# Supplementary material for: Carborane-Containing Hydroxamate MMP Ligands for the Treatment of Tumors Using Boron Neutron Capture Therapy (BNCT): Efficacy without Tumor Cell Entry
Source: MDPI journal article supplement (doi:10.3390/ijms24086973), 2023-04-09
Supplement: s1 [file s1]

## SUPPORTING INFORMATION

### Carborane-Containing Hydroxamate MMP Ligands for the Treatment of Tumors using Boron Neutron Capture Therapy (BNCT): Efficacy Without Tumor Cell Entry

Sebastian Flieger<sup>1</sup>, Mao Takagaki<sup>2</sup>, Natsuko Kondo<sup>3</sup>, Marlon R. Lutz, Jr.<sup>1</sup>, Yash Gupta<sup>4</sup>, Hiroki Ueda<sup>3</sup>, Yoshinori Sakurai<sup>3</sup>, Graham Moran<sup>1</sup>, Prakasha Kempaiah<sup>4</sup>, Narayan Hosmane<sup>5</sup>, Minoru Suzuki<sup>3</sup>, and Daniel P. Becker<sup>1\*</sup>

<sup>1</sup>Department of Chemistry and Biochemistry, Loyola University Chicago, Chicago, IL, 60660, USA

<sup>2</sup>Research Center for Nuclear Physics, Osaka University, 10-1 Mihoga-oka, Ibaraki-city, Osaka 567-0047, JAPAN

<sup>3</sup>Particle Radiation Oncology Research Center, Institute for Integrated Radiation and Nuclear Science, Kyoto University, 2-1010 Asashiro-Nishi, Kumatori, Sennan-gun, Osaka 590-0494 JAPAN

<sup>4</sup>Department of Medicine, Infectious Diseases, Mayo Clinic, Jacksonville, Florida, USA

<sup>5</sup>Department of Chemistry and Biochemistry, Northern Illinois University, DeKalb IL 60115, USA

\*Correspondence: [dbecke3@luc.edu](mailto:dbecke3@luc.edu)

#### Table of Contents

|                                                                                                                                                    |     |
|----------------------------------------------------------------------------------------------------------------------------------------------------|-----|
| 1. HPLC of Closo-carborane complex from (R)-tert-Butyl 2-(4-Methoxyphenylsulfonamido-N-(prop-2-yn-1-yl))-3-methylbutanoate <b>8</b>                | S4  |
| 2. <sup>1</sup> H NMR of Closo-carborane complex from (R)-tert-Butyl 2-(4-Methoxyphenylsulfonamido-N-(prop-2-yn-1-yl))-3-methylbutanoate <b>8</b>  | S5  |
| 3. <sup>13</sup> C NMR of Closo-carborane complex from (R)-tert-Butyl 2-(4-Methoxyphenylsulfonamido-N-(prop-2-yn-1-yl))-3-methylbutanoate <b>8</b> | S6  |
| 4. HRMS of Closo-carborane complex from (R)-tert-Butyl 2-(4-Methoxyphenylsulfonamido-N-(prop-2-yn-1-yl))-3-methylbutanoate <b>8</b>                | S7  |
| 5. HPLC of Carboxylic Acid Closo-Carborane <b>9</b>                                                                                                | S8  |
| 6. <sup>1</sup> H NMR of Carboxylic Acid Closo-Carborane <b>9</b>                                                                                  | S9  |
| 7. <sup>13</sup> C NMR of Carboxylic Acid Closo-Carborane <b>9</b>                                                                                 | S10 |
| 8. HRMS of Carboxylic Acid Closo-Carborane <b>9</b>                                                                                                | S11 |
| 9. HPLC of THP-Protected Hydroxamate Closo-Carborane <b>10</b>                                                                                     | S12 |
| 10. <sup>1</sup> H NMR of THP-Protected Hydroxamate Closo-Carborane <b>10</b>                                                                      | S13 |
| 11. <sup>13</sup> C NMR of THP-Protected Hydroxamate Closo-Carborane <b>10</b>                                                                     | S14 |

|                                                                                                                                                                                                          |        |
|----------------------------------------------------------------------------------------------------------------------------------------------------------------------------------------------------------|--------|
| 12. HRMS of THP-Protected Hydroxamate Closo-Carborane <b>10</b>                                                                                                                                          | S15-16 |
| 13. HPLC of Hydroxamic Acid Closo-Carborane <b>3</b>                                                                                                                                                     | S17    |
| 14. <sup>1</sup> H NMR of Hydroxamic Acid Closo-Carborane <b>3</b>                                                                                                                                       | S18    |
| 15. <sup>13</sup> C NMR of Hydroxamic Acid Closo-Carborane <b>3</b>                                                                                                                                      | S19    |
| 16. HRMS of Hydroxamic Acid Closo-Carborane <b>3</b>                                                                                                                                                     | S20-21 |
| 17. HPLC of Methyl ( <i>R</i> )-2-((4-methoxy- <i>N</i> -(pyridine-3-ylmethyl) phenyl) sulfonamido) pent-4-ynoate <b>(14)</b>                                                                            | S22    |
| 18. <sup>1</sup> H NMR of Methyl ( <i>R</i> )-2-((4-methoxy- <i>N</i> -(pyridine-3-ylmethyl) phenyl) sulfonamido) pent-4-ynoate <b>(14)</b>                                                              | S23    |
| 19. <sup>13</sup> C NMR of Methyl ( <i>R</i> )-2-((4-methoxy- <i>N</i> -(pyridine-3-ylmethyl) phenyl) sulfonamido) pent-4-ynoate <b>(14)</b>                                                             | S24    |
| 20. HRMS of Methyl ( <i>R</i> )-2-((4-methoxy- <i>N</i> -(pyridine-3-ylmethyl) phenyl) sulfonamido) pent-4-ynoate <b>(14)</b>                                                                            | S25-26 |
| 21. HPLC of ( <i>R</i> )-2-((4-methoxy- <i>N</i> -(pyridin-3-ylmethyl)phenyl)sulfonamido)pent-4-ynoic acid <b>(15)</b>                                                                                   | S27    |
| 22. <sup>1</sup> H NMR of ( <i>R</i> )-2-((4-methoxy- <i>N</i> -(pyridin-3-ylmethyl)phenyl)sulfonamido)pent-4-ynoic acid <b>(15)</b>                                                                     | S28    |
| 23. <sup>13</sup> C NMR of ( <i>R</i> )-2-((4-methoxy- <i>N</i> -(pyridin-3-ylmethyl)phenyl)sulfonamido)pent-4-ynoic acid <b>(15)</b>                                                                    | S29    |
| 24. HRMS of ( <i>R</i> )-2-((4-methoxy- <i>N</i> -(pyridin-3-ylmethyl)phenyl)sulfonamido)pent-4-ynoic acid <b>(15)</b>                                                                                   | S30-31 |
| 25. HPLC of 4-methoxy- <i>N</i> -((2 <i>R</i> )-1-oxo-1-(((tetrahydro-2 <i>H</i> -pyran-2-yl)oxy)-l2-azaneyl)pent-4-yn-2-yl)- <i>N</i> -(pyridin-3-ylmethyl)benzenesulfonamide <b>(16)</b>               | S32    |
| 26. <sup>1</sup> H NMR of 4-methoxy- <i>N</i> -((2 <i>R</i> )-1-oxo-1-(((tetrahydro-2 <i>H</i> -pyran-2-yl)oxy)-l2-azaneyl)pent-4-yn-2-yl)- <i>N</i> -(pyridin-3-ylmethyl)benzenesulfonamide <b>(16)</b> | S33    |

|                                                                                                                                                                         |        |
|-------------------------------------------------------------------------------------------------------------------------------------------------------------------------|--------|
| 27. <sup>13</sup> C NMR of 4-methoxy-N-((2R)-1-oxo-1-(((tetrahydro-2H-pyran-2-yl)oxy)-12-azaneyl)pent-4-yn-2-yl)-N-(pyridin-3-ylmethyl)benzenesulfonamide ( <b>16</b> ) | S34    |
| 28. HRMS of 4-methoxy-N-((2R)-1-oxo-1-(((tetrahydro-2H-pyran-2-yl)oxy)-12-azaneyl)pent-4-yn-2-yl)-N-(pyridin-3-ylmethyl)benzenesulfonamide ( <b>16</b> )                | S35-36 |
| 29. HPLC of THP-protected 1,4-Click Isomer <b>18</b>                                                                                                                    | S37    |
| 30. <sup>1</sup> H NMR of THP-protected 1,4-Click Isomer <b>18</b>                                                                                                      | S38    |
| 31. <sup>13</sup> C NMR of THP-protected 1,4-Click Isomer <b>18</b>                                                                                                     | S39    |
| 32. HRMS of THP-protected 1,4-Click Isomer <b>18</b>                                                                                                                    | S40-41 |
| 33. HPLC of Hydroxamic Acid 1,4-triazole <b>4</b>                                                                                                                       | S42    |
| 34. <sup>1</sup> H NMR of Hydroxamic Acid 1,4-triazole <b>4</b>                                                                                                         | S43    |
| 35. <sup>13</sup> C NMR of Hydroxamic Acid 1,4-triazole <b>4</b>                                                                                                        | S44    |
| 36. HRMS of Hydroxamic Acid 1,4-triazole <b>4</b>                                                                                                                       | S45-46 |
| 37. Docking Figure <b>S1a</b>                                                                                                                                           | S47    |
| 38. Docking Figure <b>S1b</b>                                                                                                                                           | S48    |
| 39. Docking Figure <b>S2a</b>                                                                                                                                           | S49    |
| 40. Docking Figure <b>S2b</b>                                                                                                                                           | S50    |
| 41. Docking PDB Files                                                                                                                                                   | S51    |
| 42. Cytotoxicity of Compound <b>3</b> (SF-4-6A)                                                                                                                         | S52-53 |
| 43. Drug Water Solubility Raw Data (Figures S3-S6)                                                                                                                      | S54-61 |
| 44. Figure S7a/b. Survival fraction in U87 MG cells and in SCC7 cells                                                                                                   | S62    |
| 45. Figure S8. Boron concentrations in SCC7 cells and U87 cells by ICP-OES                                                                                              | S63    |

HPLC of Closo-carborane complex from (R)-tert-Butyl 2-(4-Methoxyphenylsulfonamido-N-(prop-2-yn-1-yl))-3-methylbutanoate **8**.

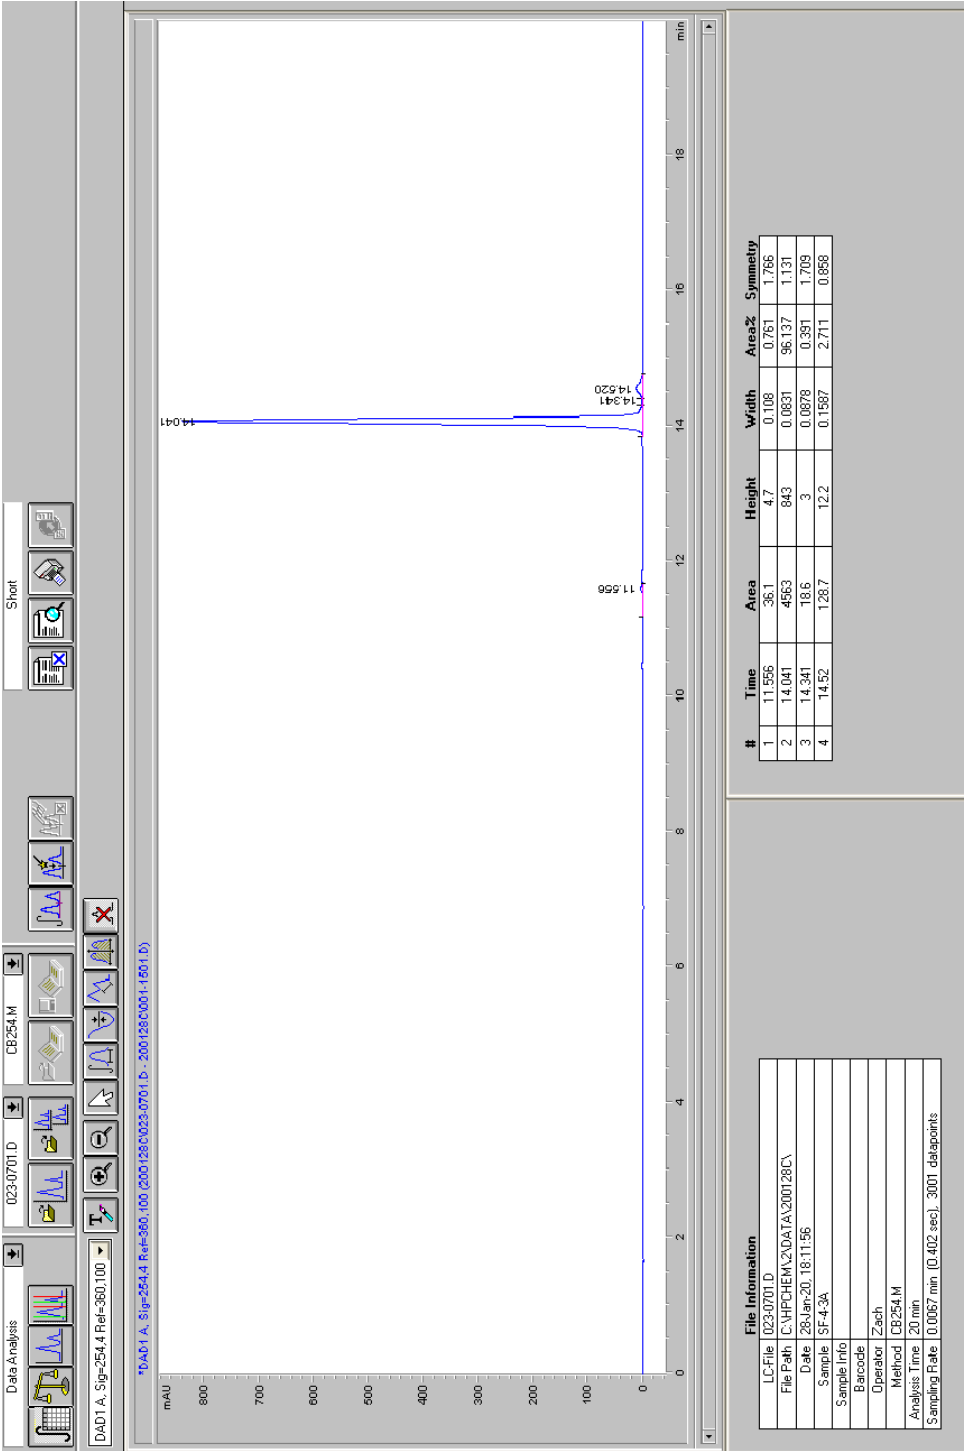

$^1\text{H}$  NMR of Closo-carborane complex from (R)-tert-Butyl 2-(4-Methoxyphenylsulfonamido-N-(prop-2-yn-1-yl))-3-methylbutanoate **8**.

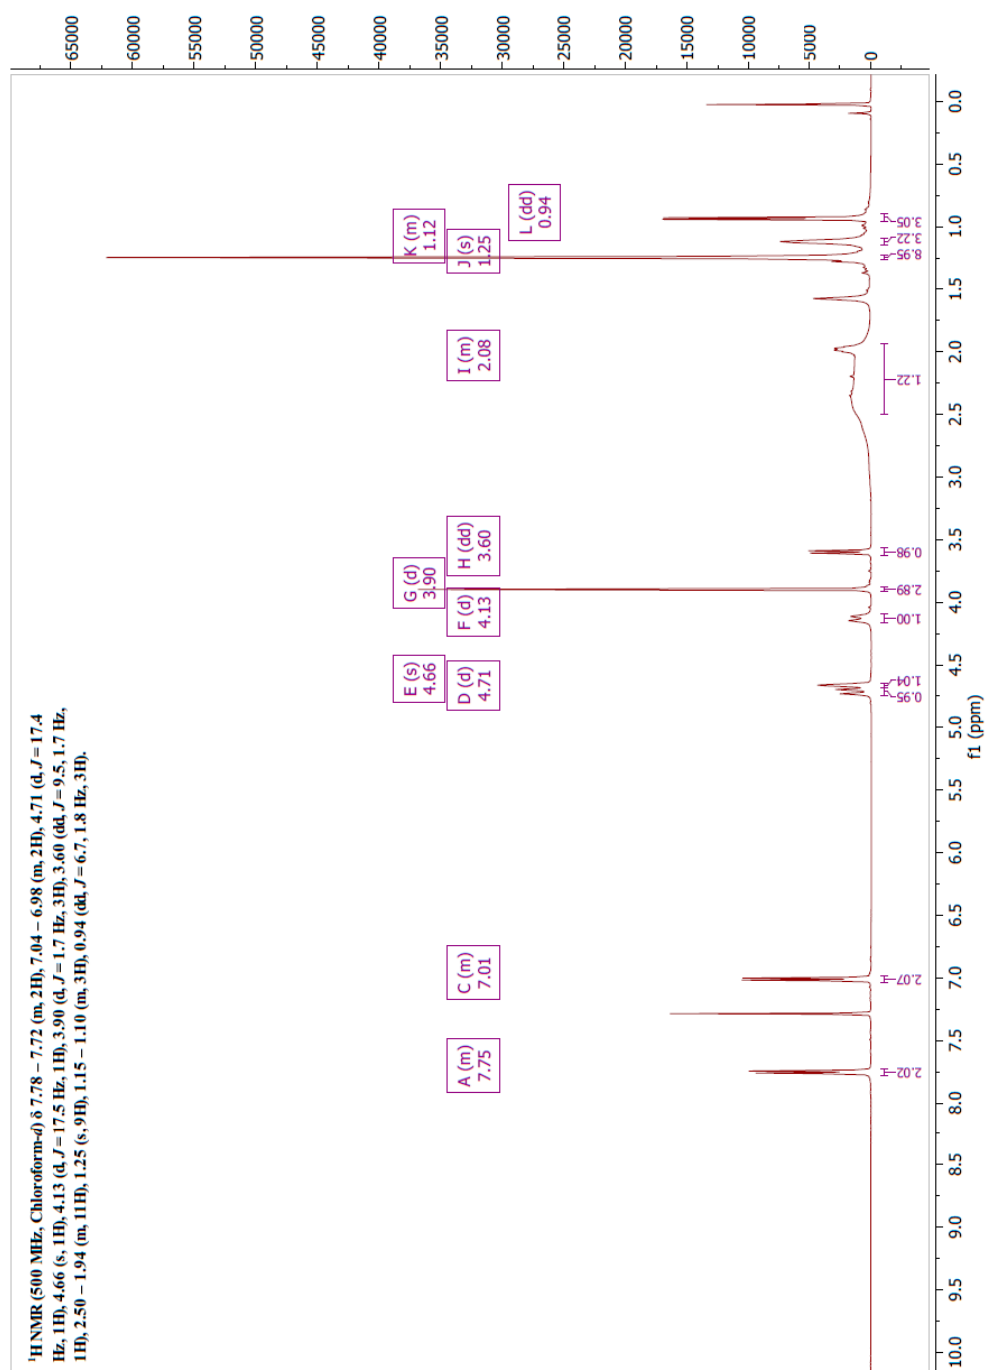

$^{13}\text{C}$  NMR of Closo-carborane complex from (R)-tert-Butyl 2-(4-Methoxyphenylsulfonamido-N-(prop-2-yn-1-yl))-3-methylbutanoate **8**.

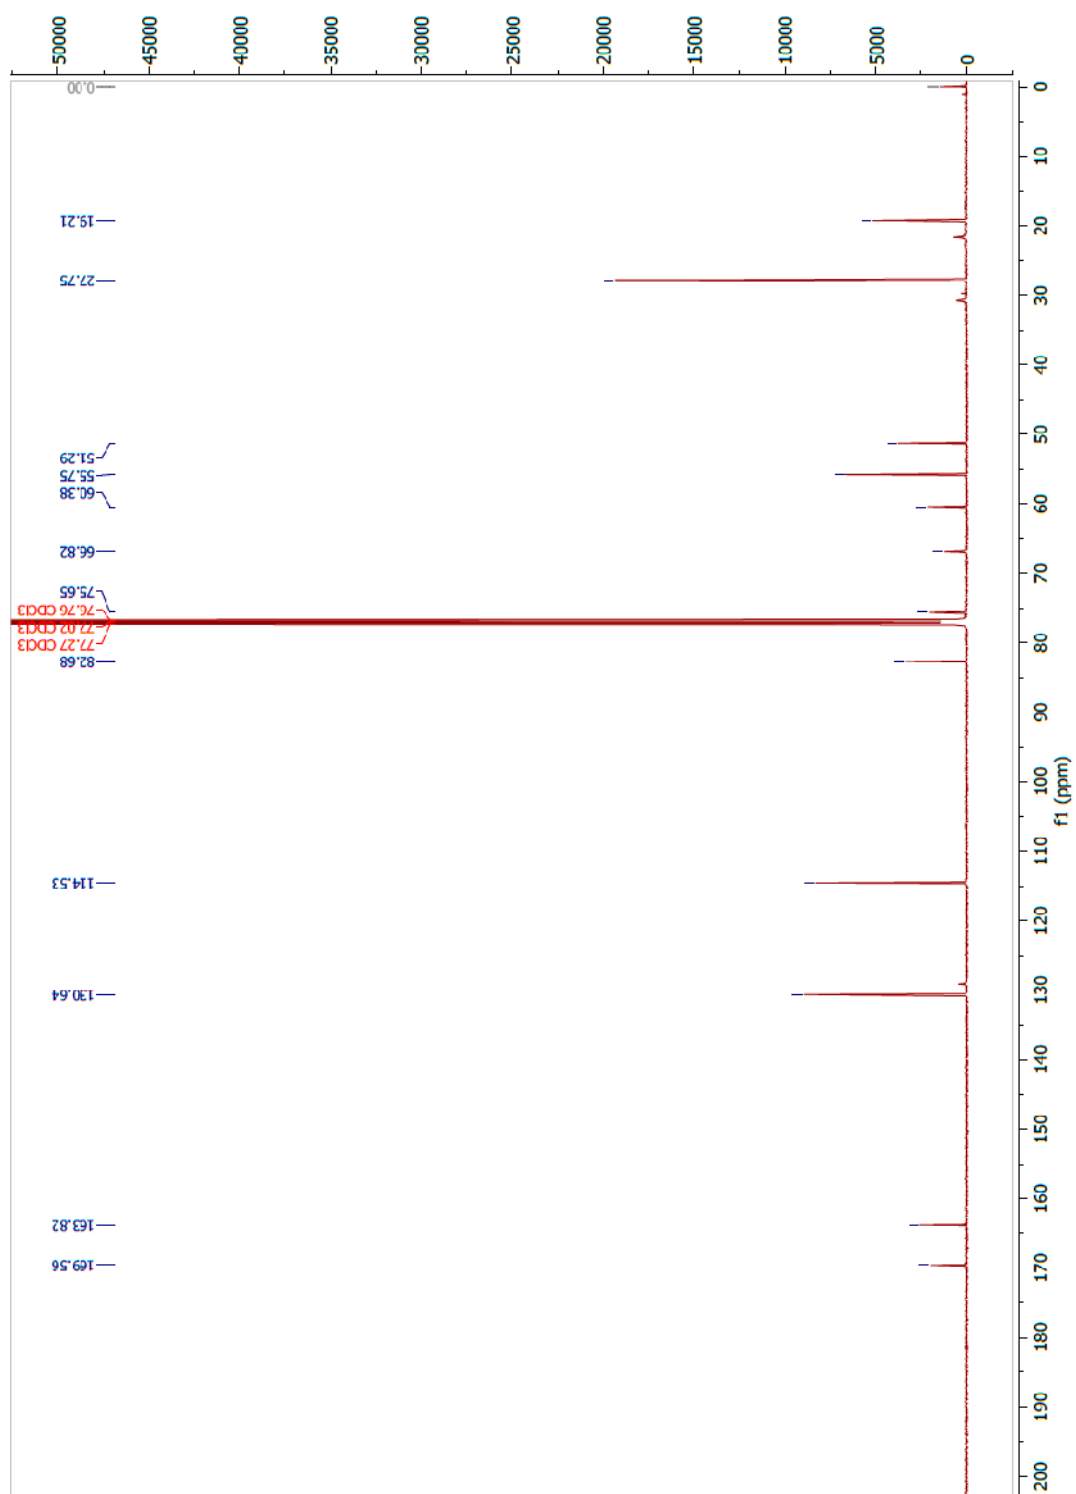

HRMS of Closo-carborane complex from (R)-tert-Butyl 2-(4-Methoxyphenylsulfonamido-N-(prop-2-yn-1-yl))-3-methylbutanoate **8**.

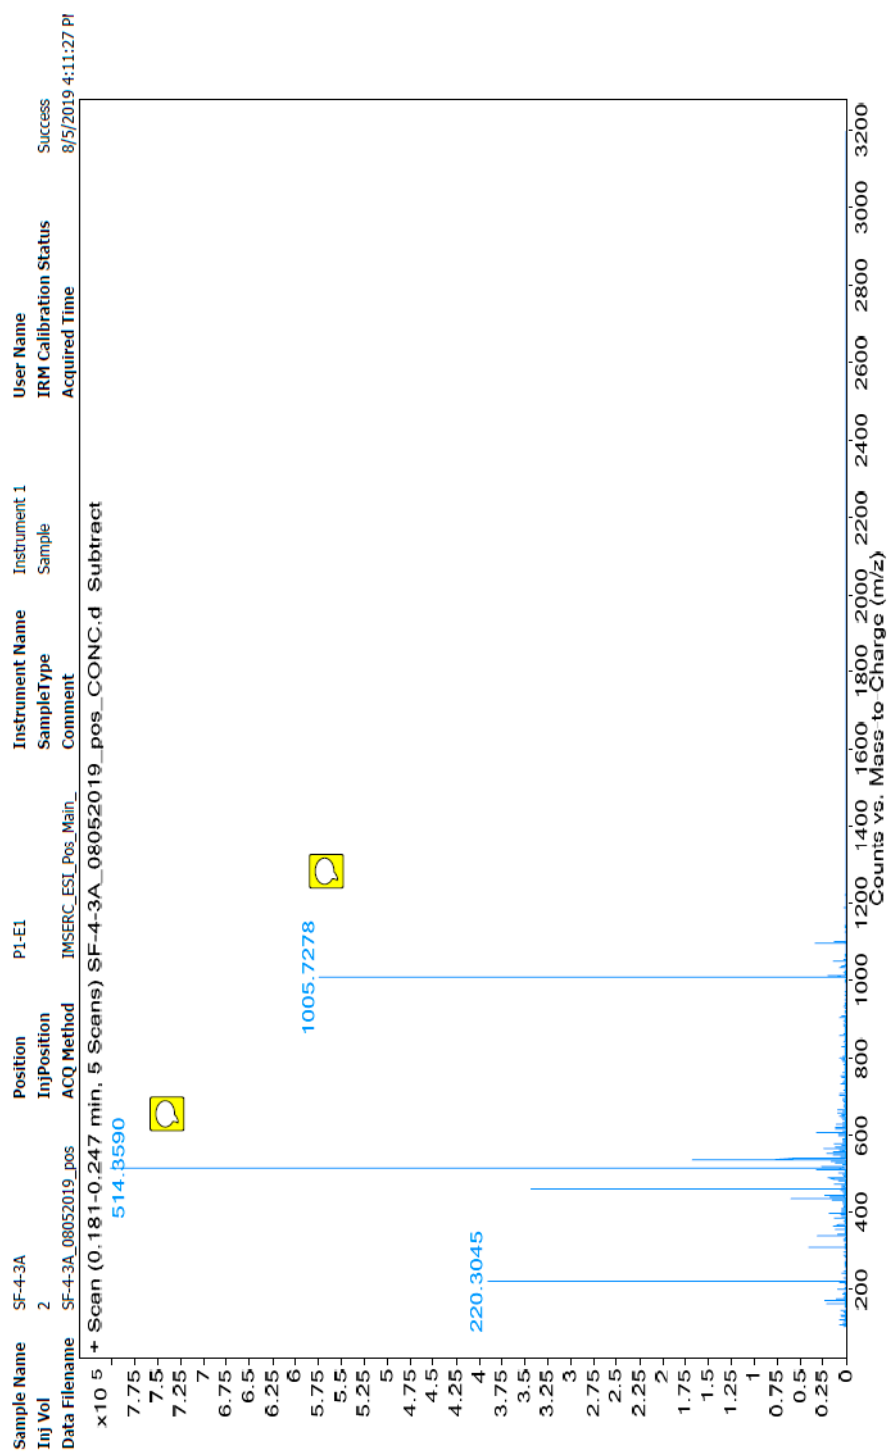

| # | Time   | Area   | Height | Width  | Area%  | Symmetry |
|---|--------|--------|--------|--------|--------|----------|
| 1 | 6.977  | 28     | 4.1    | 0.1039 | 0.370  | 0.908    |
| 2 | 12.539 | 7310.3 | 1429.3 | 0.1231 | 96.610 | 1.183    |
| 3 | 12.958 | 38.5   | 4.5    | 0.1231 | 0.522  | 0.954    |
| 4 | 13.208 | 117.3  | 6.3    | 0.1294 | 1.946  | 0.951    |
| 5 | 14.040 | 42.4   | 6.9    | 0.092  | 0.561  | 1.14     |



<sup>1</sup>H NMR of Carboxylic Acid Closo-Carborane **9**.

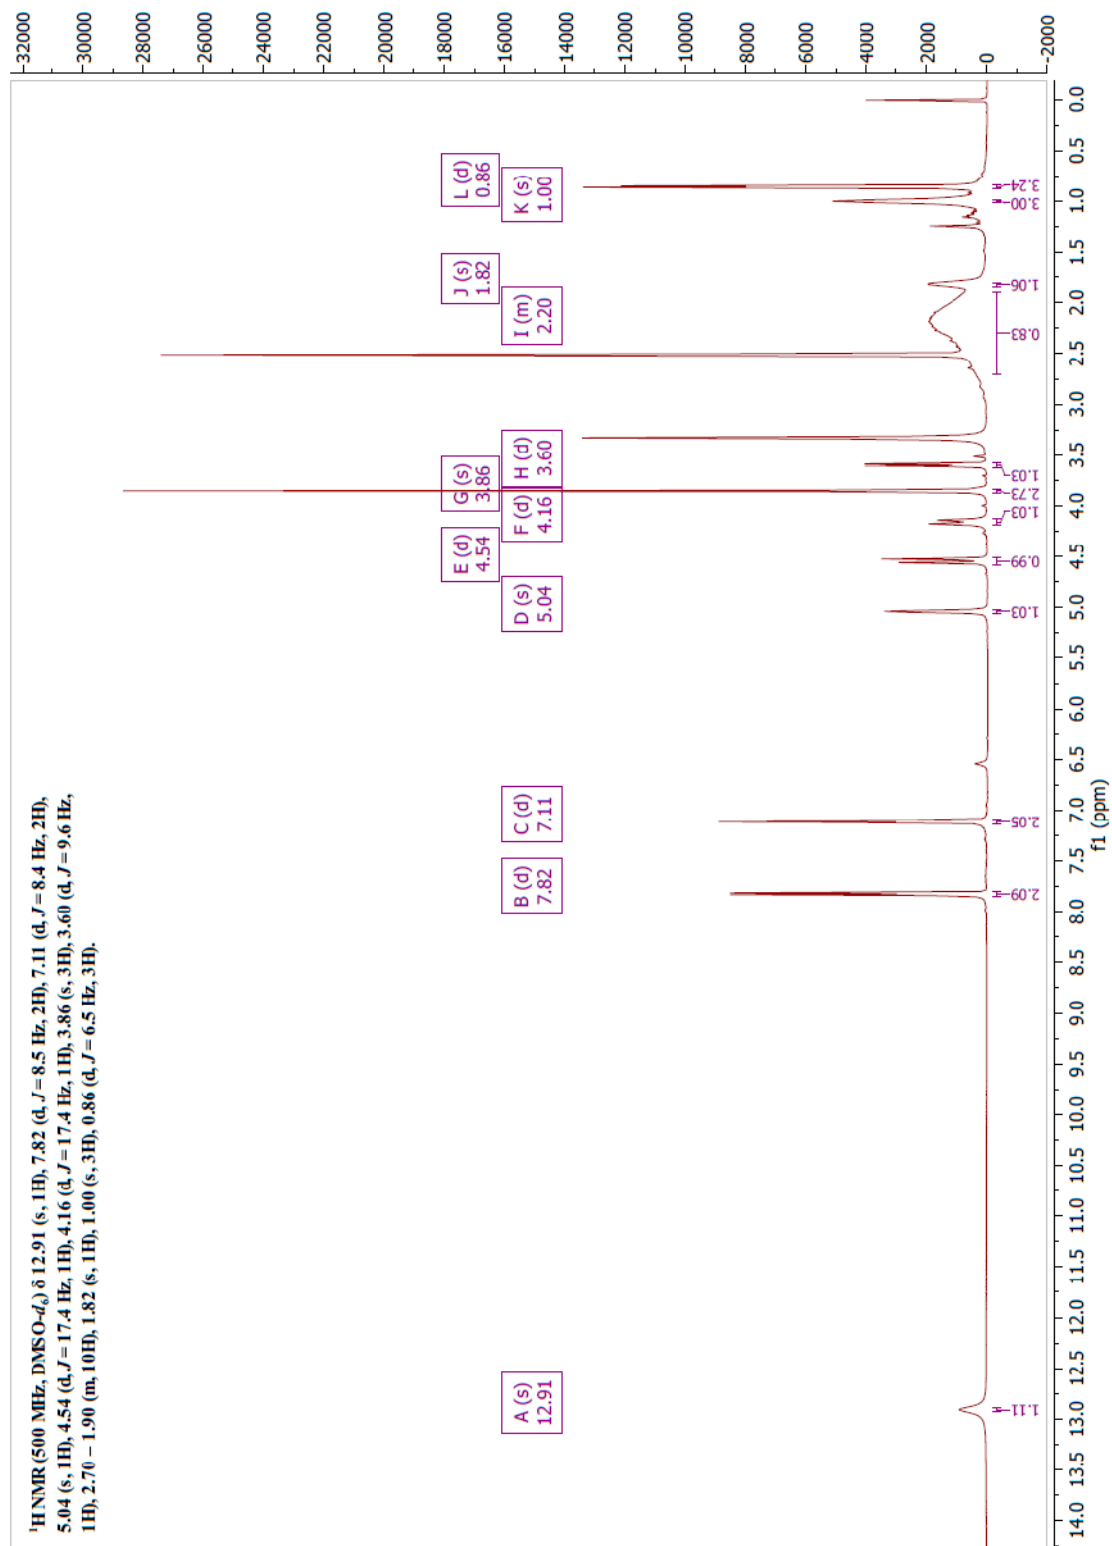

$^{13}\text{C}$  NMR of Carboxylic Acid Closo-Carborane **9**.

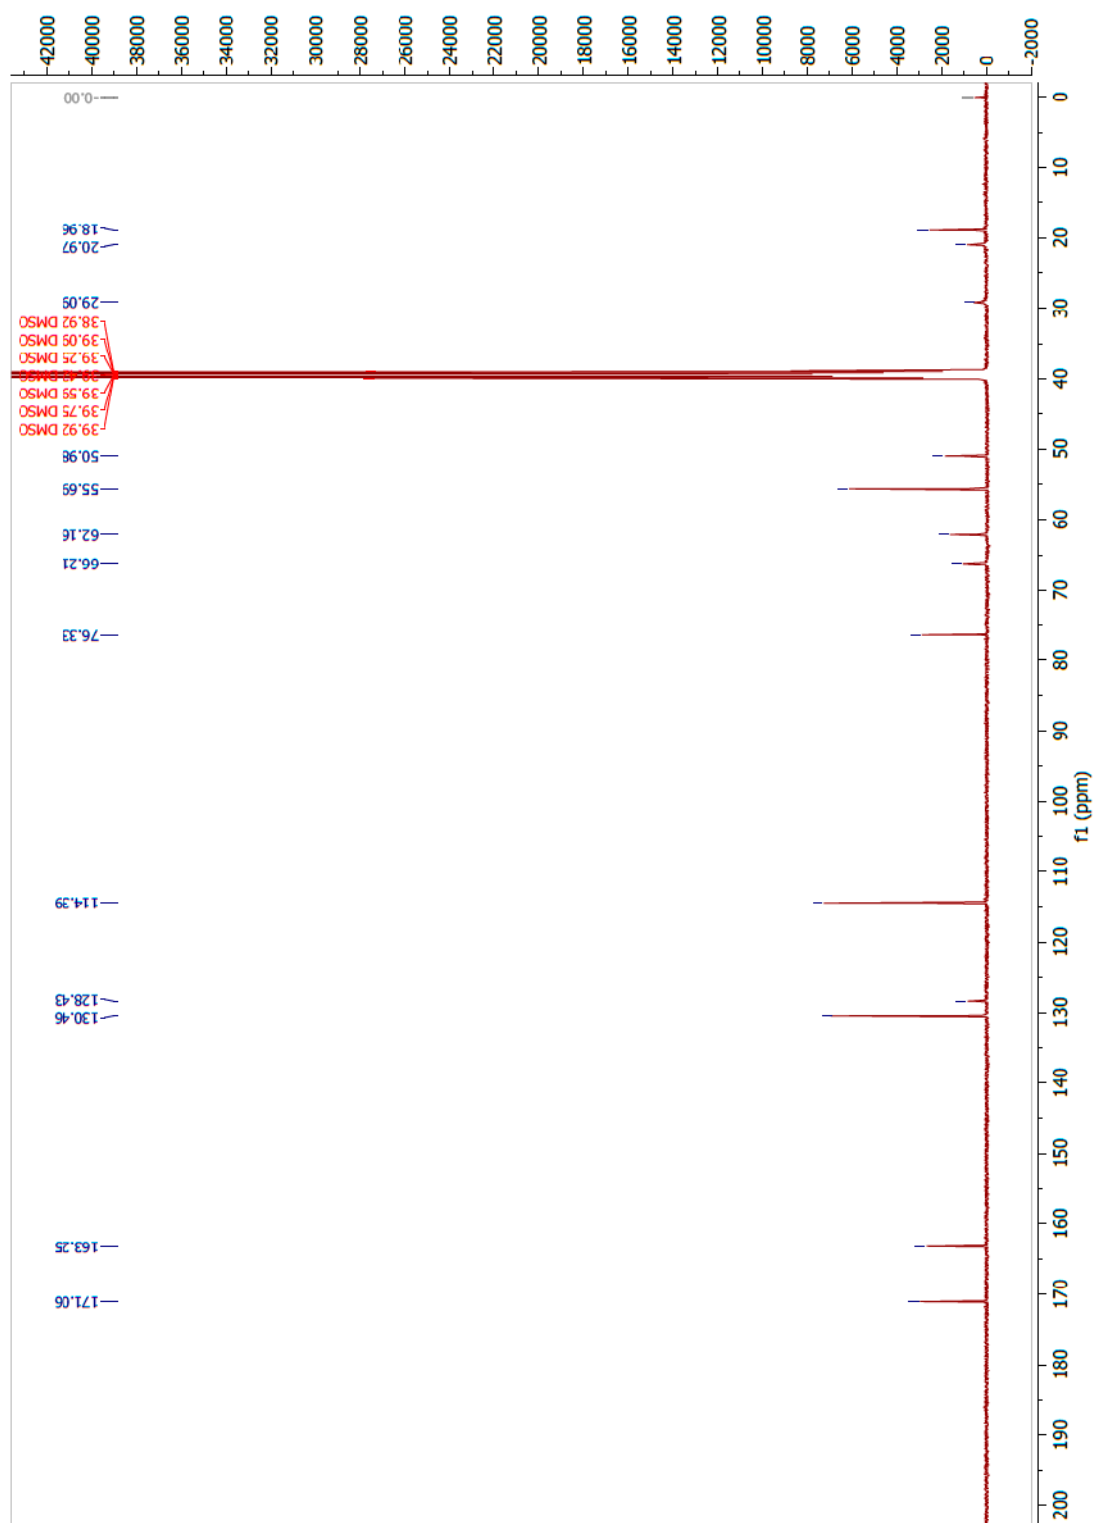

HRMS of Carboxylic Acid Closo-Carborane 9.

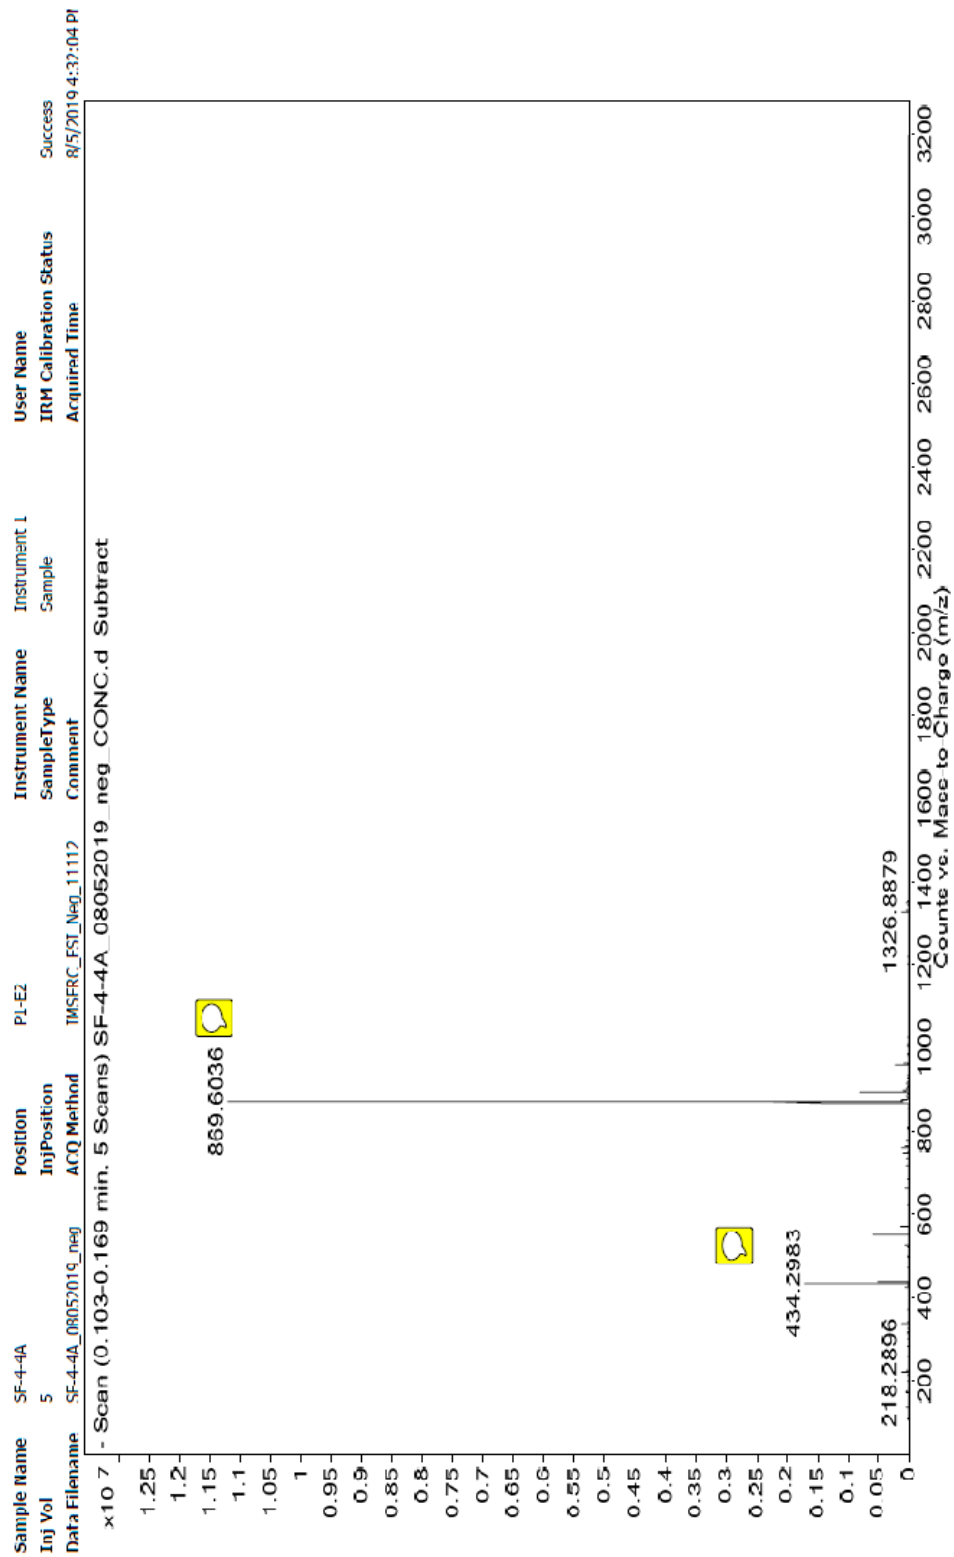

HPLC of THP-Protected Hydroxamate Closo-Carborane **10**.

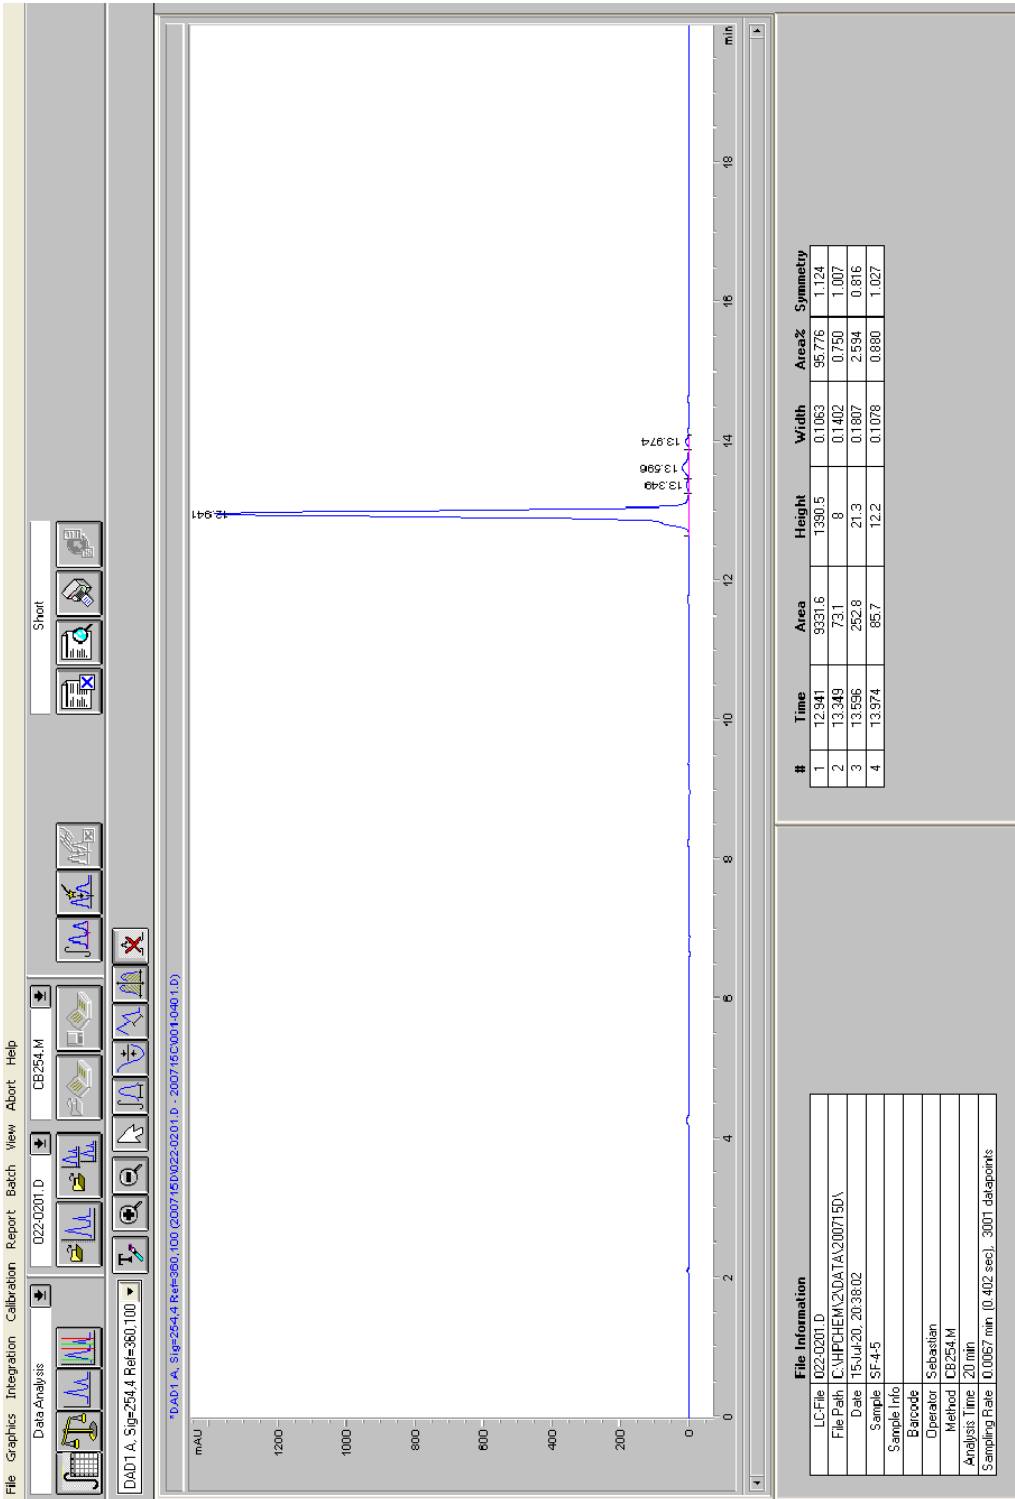

$^1\text{H}$  NMR of THP-Protected Hydroxamate Closo-Carborane **10**.

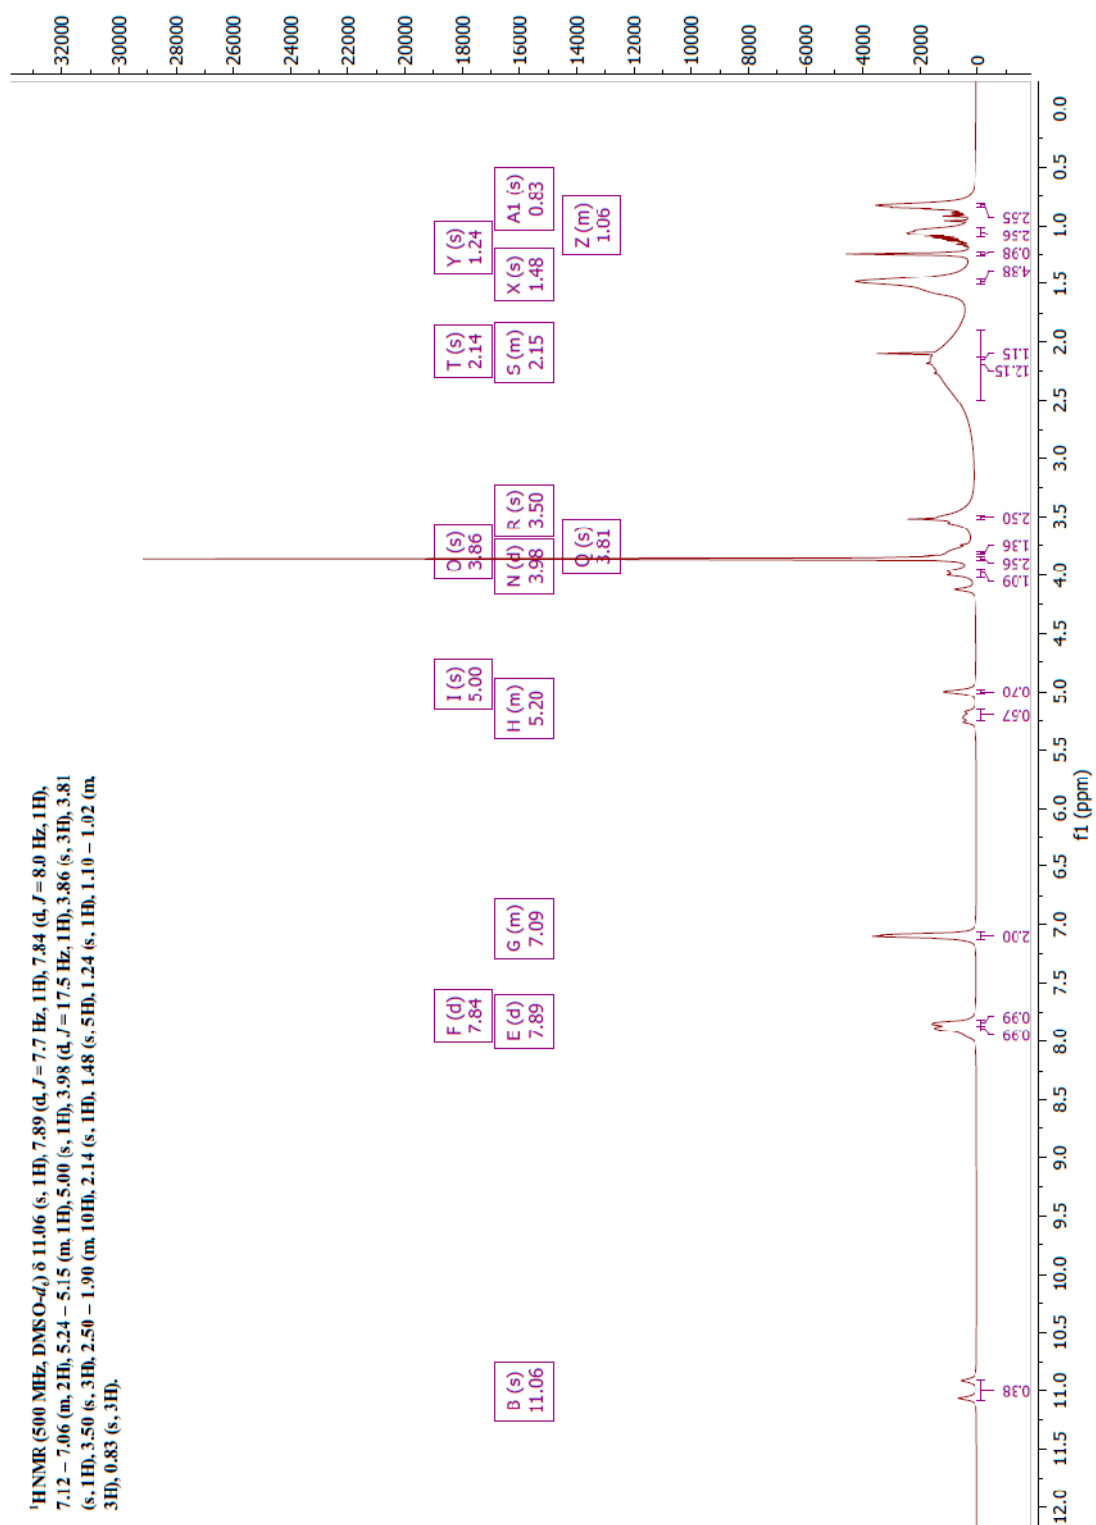

$^{13}\text{C}$  NMR of THP-Protected Hydroxamate Closo-Carborane **10**.

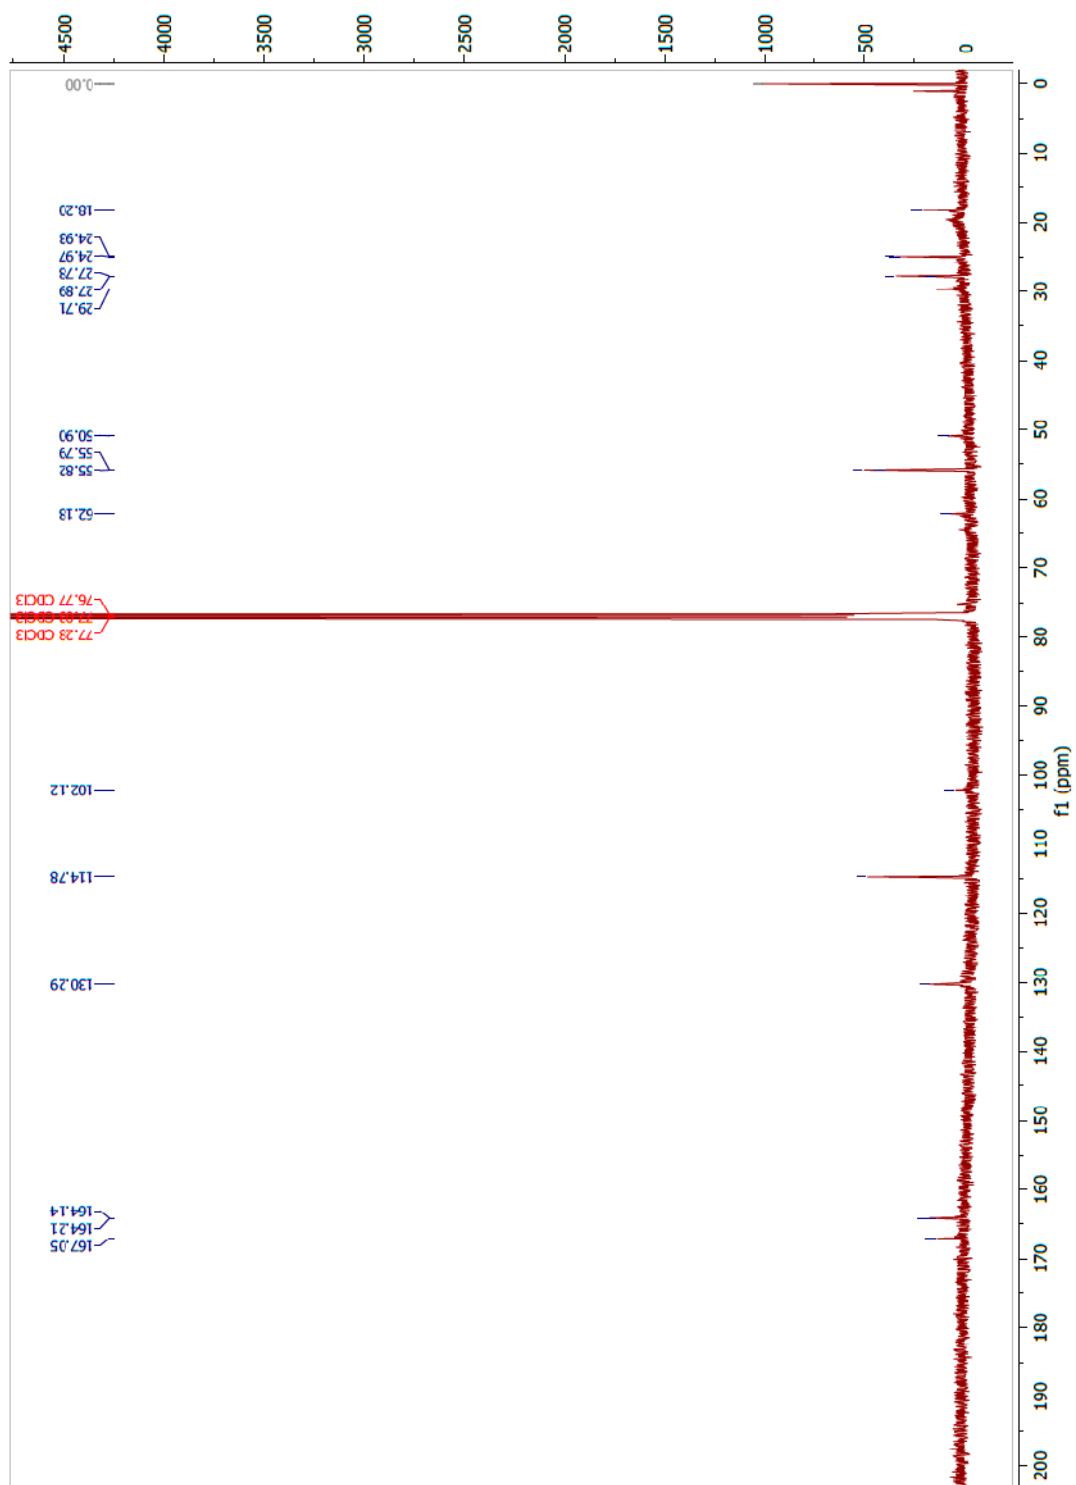

HRMS of THP-Protected Hydroxamate Closo-Carborane **10**.

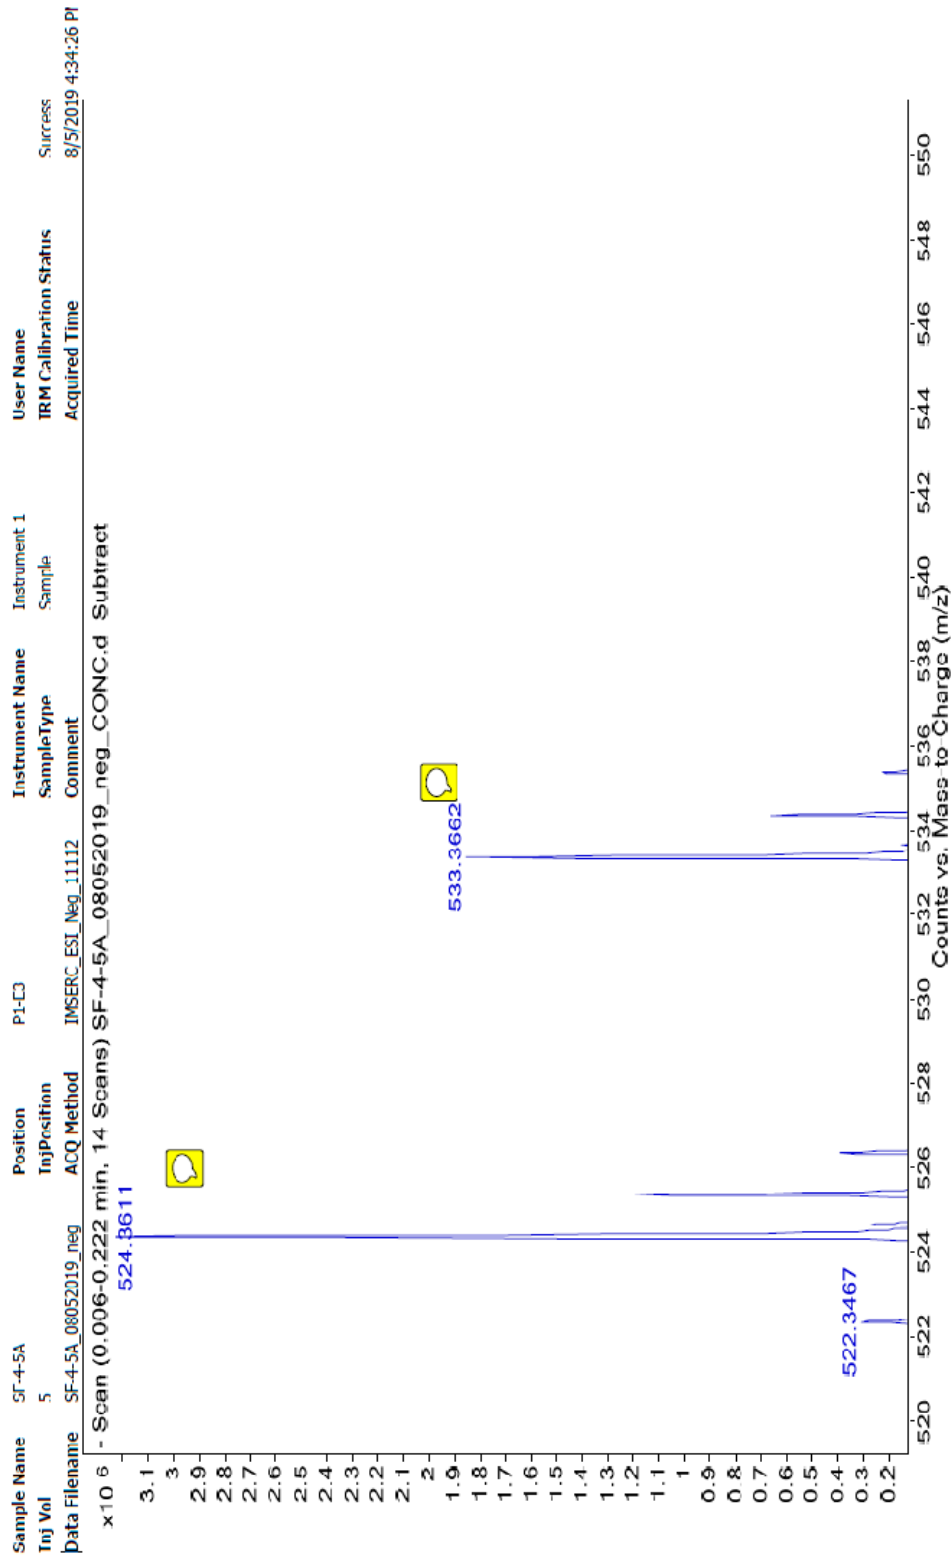

|                      |                      |                    |                      |                        |              |                               |                     |
|----------------------|----------------------|--------------------|----------------------|------------------------|--------------|-------------------------------|---------------------|
| <b>Sample Name</b>   | SF-4-5A              | <b>Position</b>    | P1-E3                | <b>Instrument Name</b> | Instrument 1 | <b>User Name</b>              |                     |
| <b>Inj Vol</b>       | 5                    | <b>InjPosition</b> |                      | <b>SampleType</b>      | Sample       | <b>IRM Calibration Status</b> | Success             |
| <b>Data Filename</b> | SF-4-5A_08052019_neg | <b>ACQ Method</b>  | IMSERC_ESI_Neg_11112 | <b>Comment</b>         |              | <b>Acquired Time</b>          | 8/5/2019 4:34:26 PM |

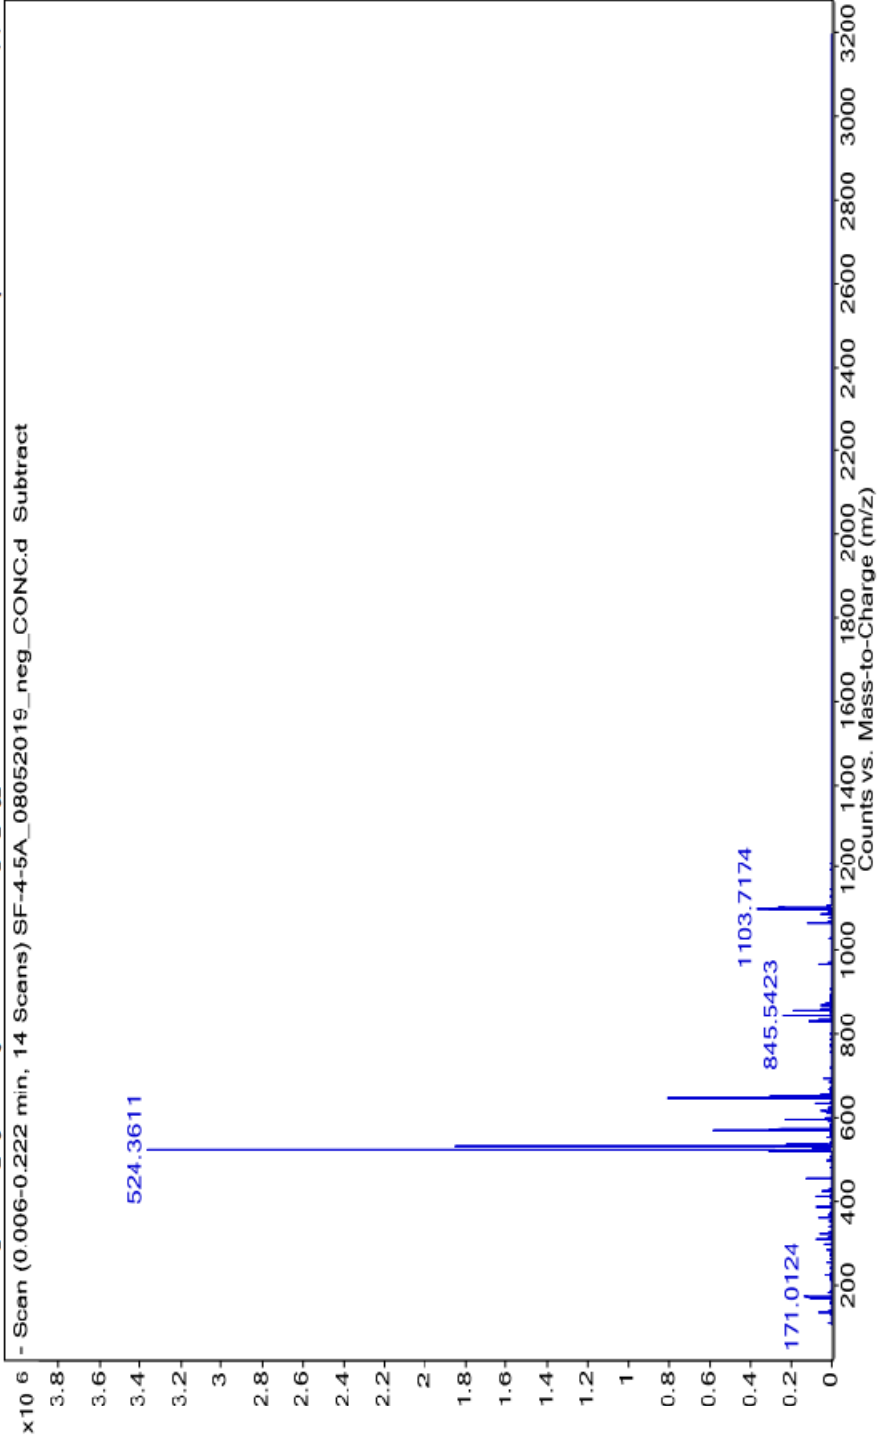



HPLC of Hydroxamic Acid Closo-Carborane 3.

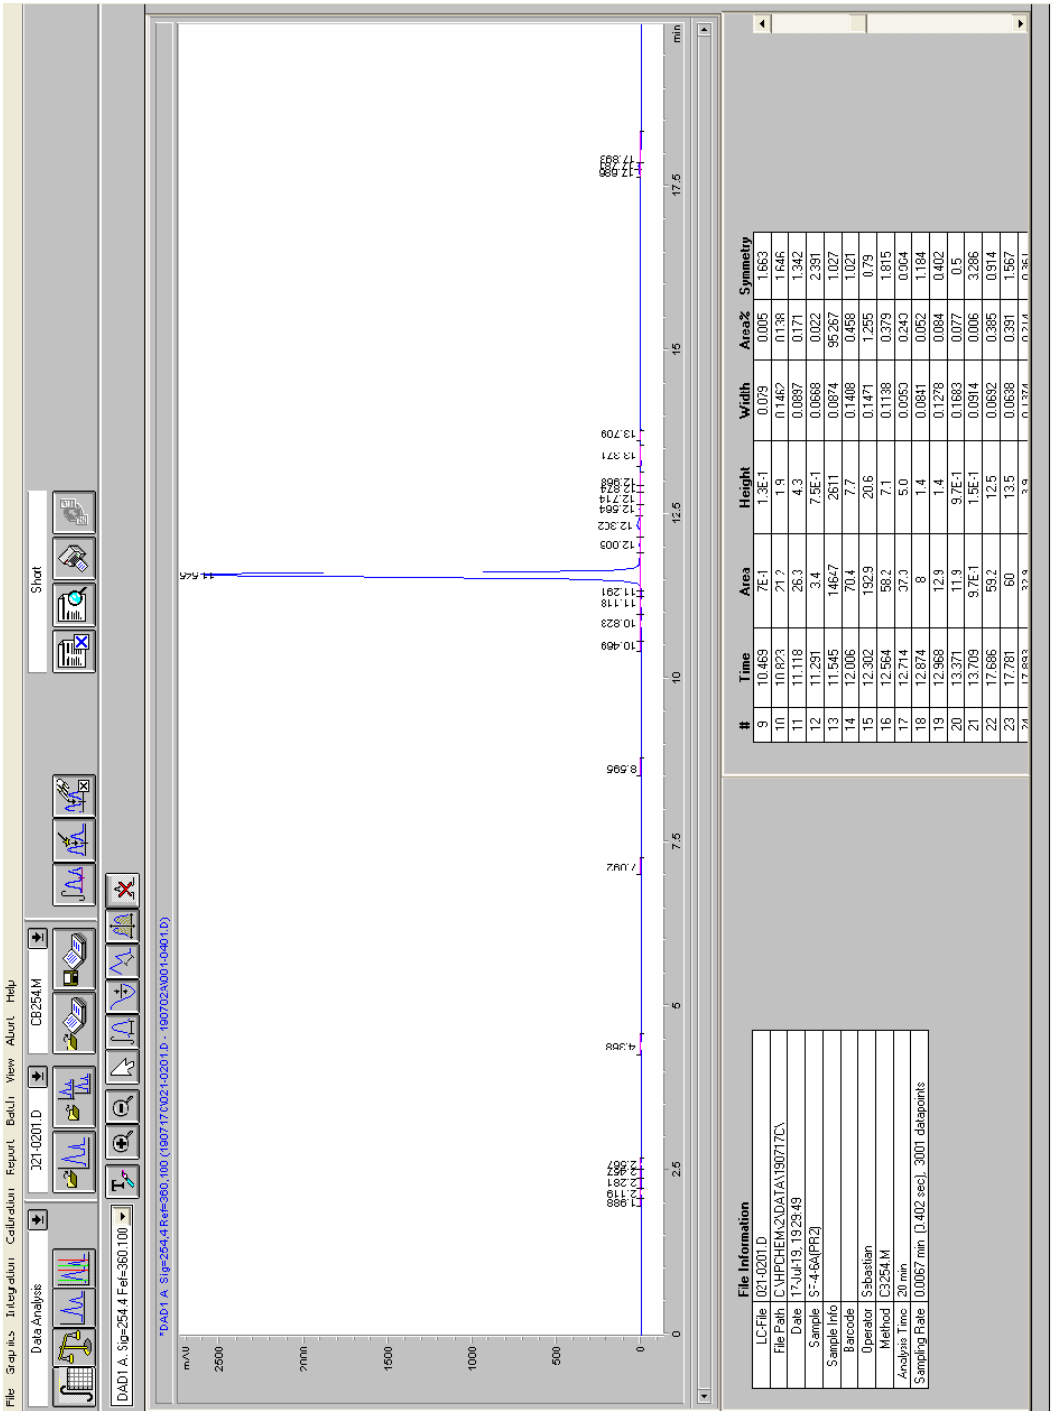

<sup>1</sup>H NMR of Hydroxamic Acid Closo-Carborane **3**.

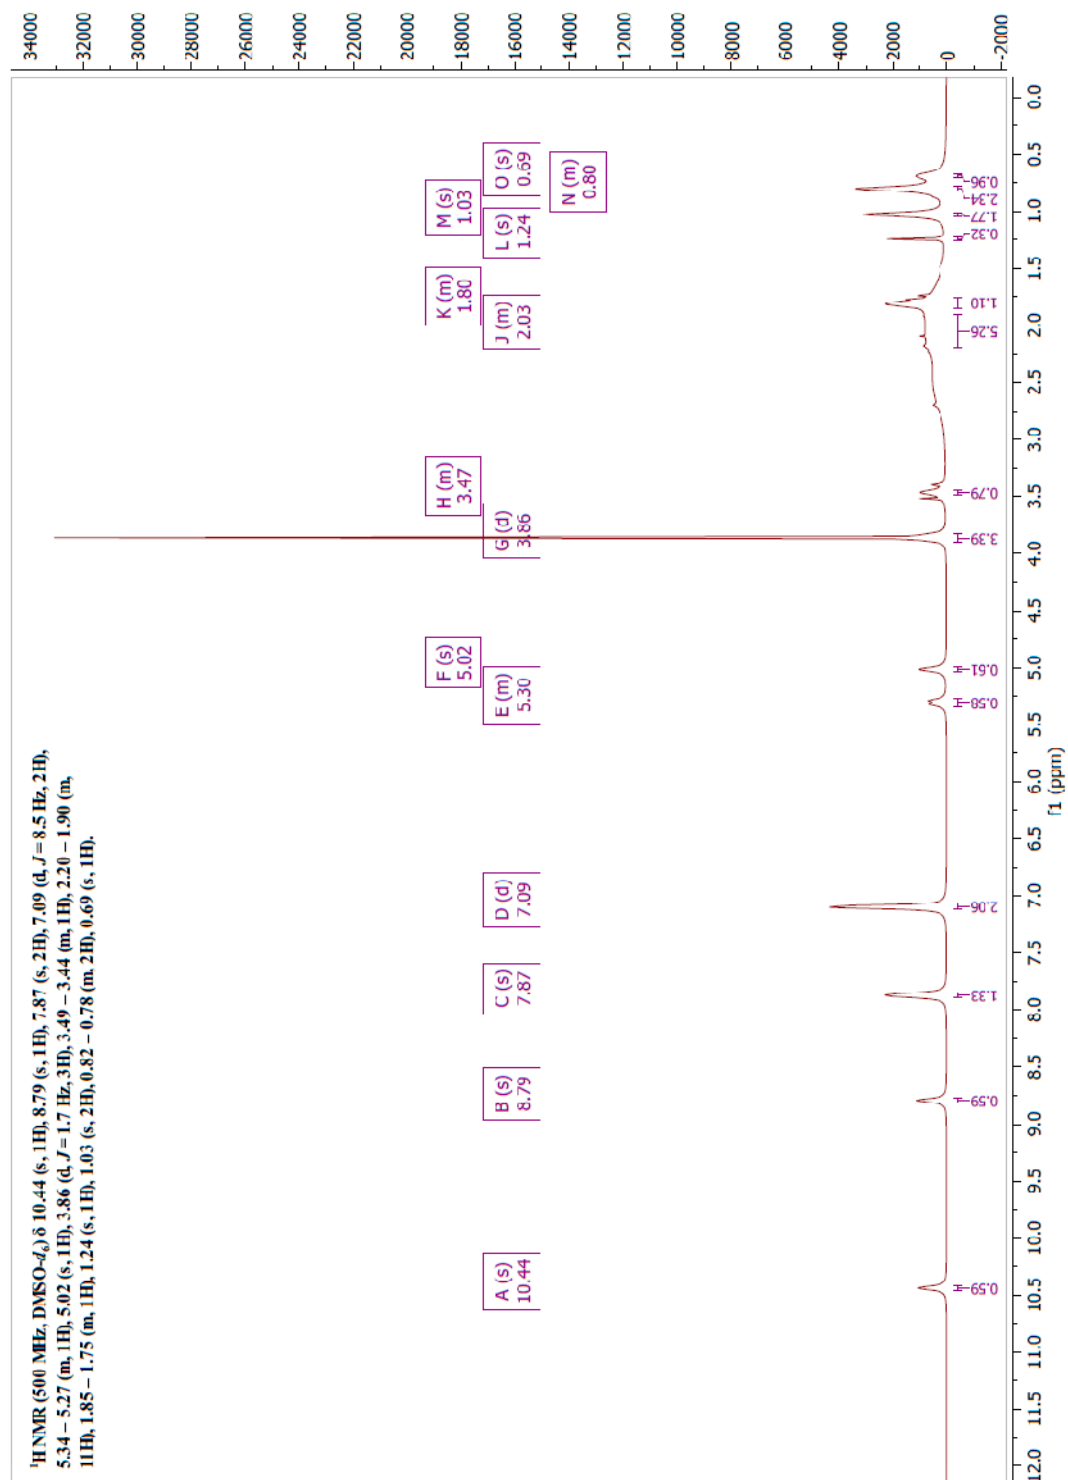

$^{13}\text{C}$  NMR of Hydroxamic Acid Closo-Carborane **3**.

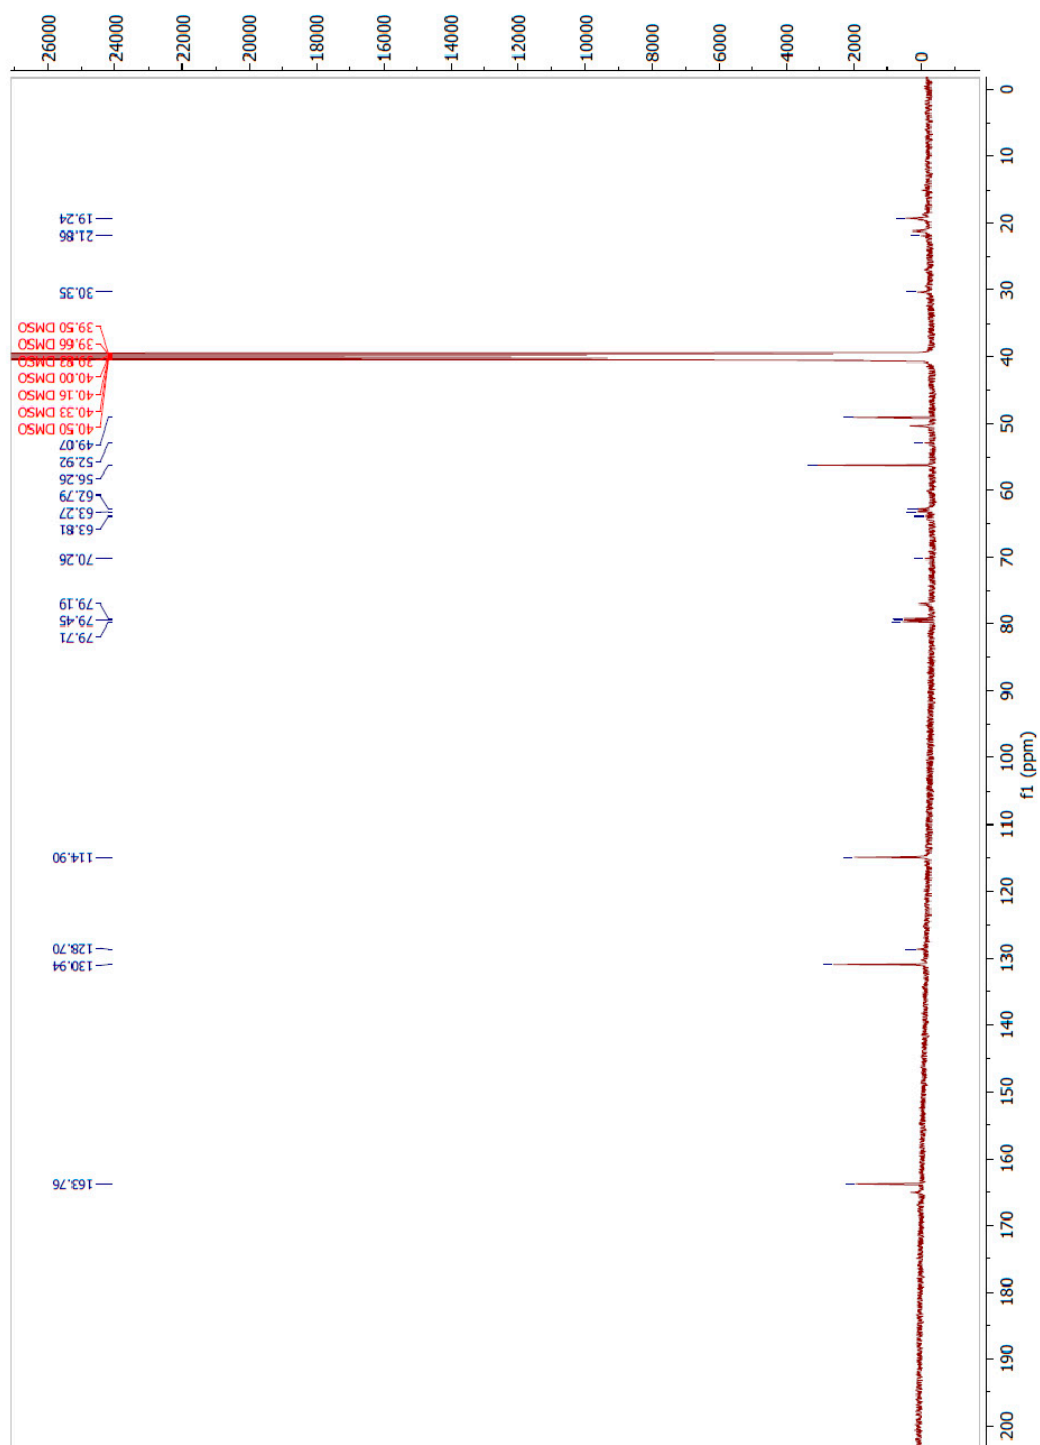

HRMS of Hydroxamic Acid Closo-Carborane **3**.

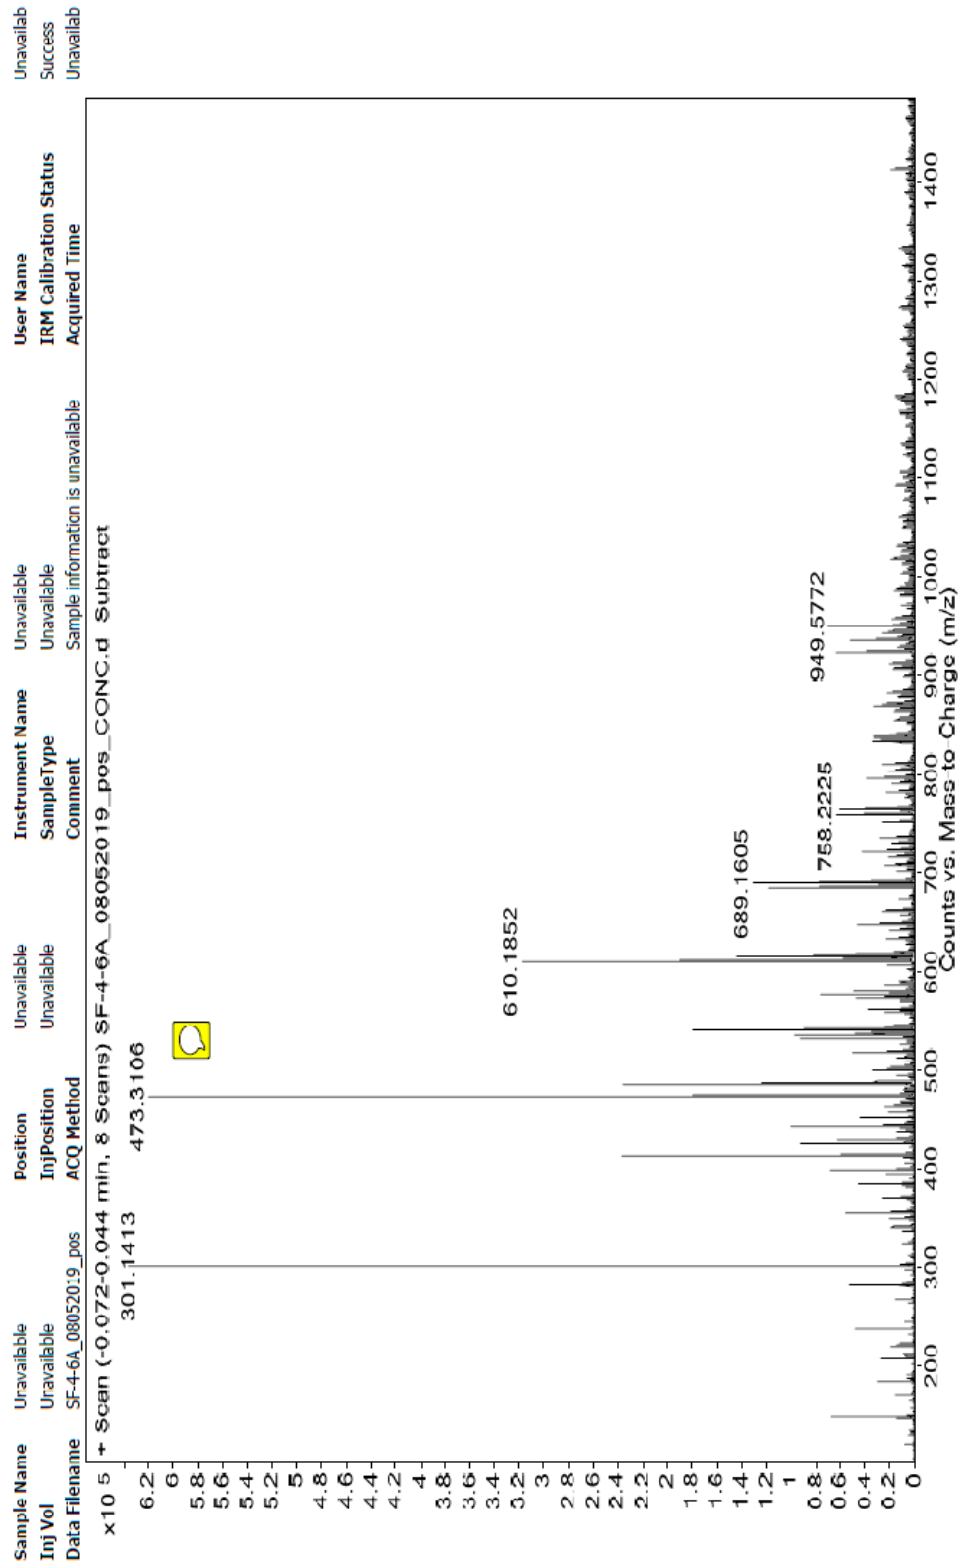

Sample Name Inj Vol Data Filename x10 5  
Unavailab  
Unavailab  
SF-4-6A\_08052019\_pos  
+ Scan (-0.072-0.044 min, 8 Scans)  
Position InjPosition ACQ Method  
Unavailab  
Unavailab  
SF-4-6A\_08052019\_pos\_CONC.d  
Instrument Name SampleType Comment  
Unavailab  
Unavailab  
Sample information is unavailable  
User Name  
IRM Calibration Status  
Acquired Time  
Unavailab  
Success  
Unavailab

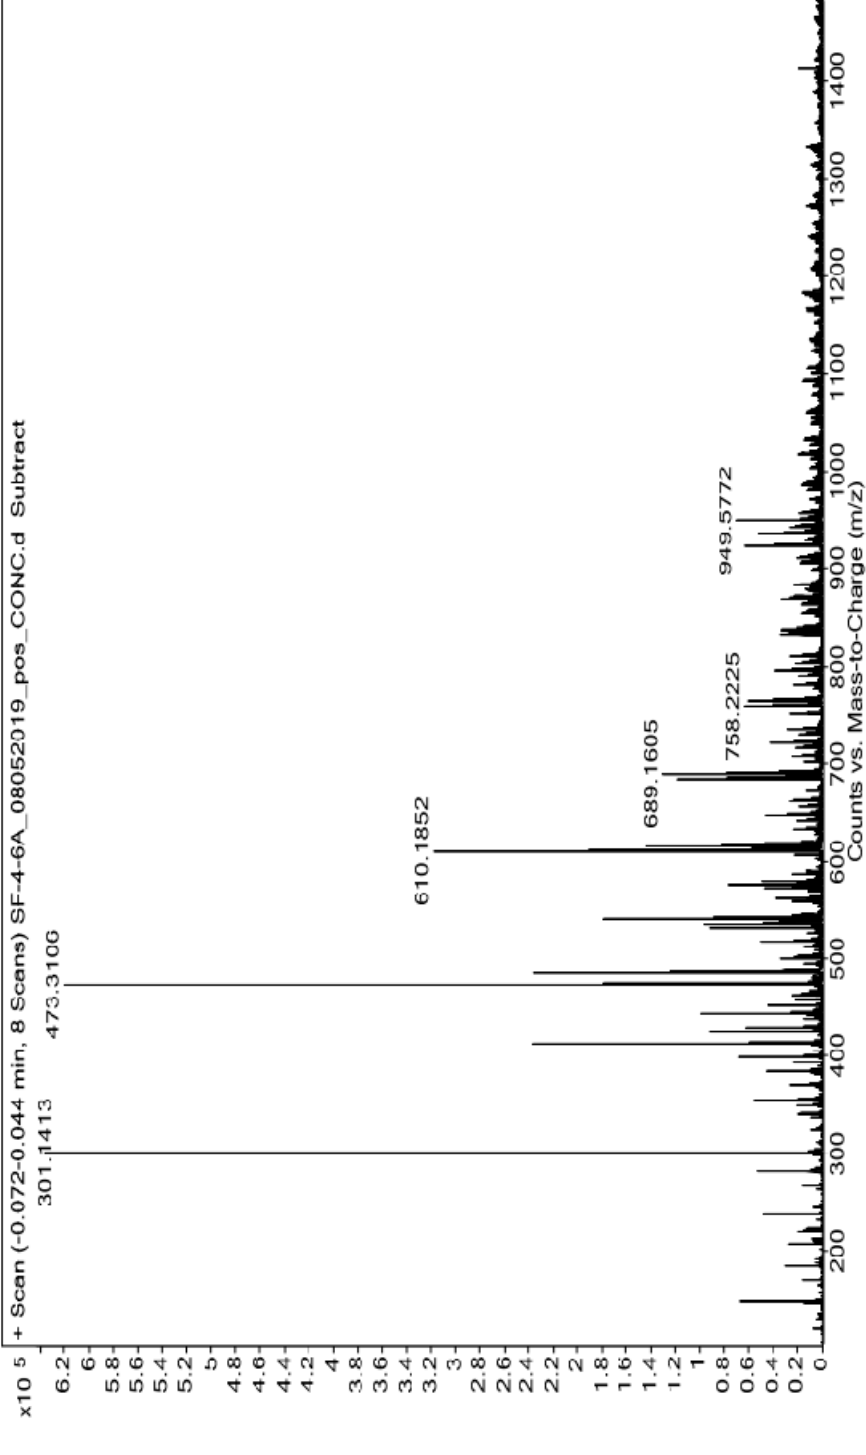

HPLC of Methyl (R)-2-((4-methoxy-N-(pyridine-3-ylmethyl) phenyl) sulfonamido) pent-4-ynoate (14).

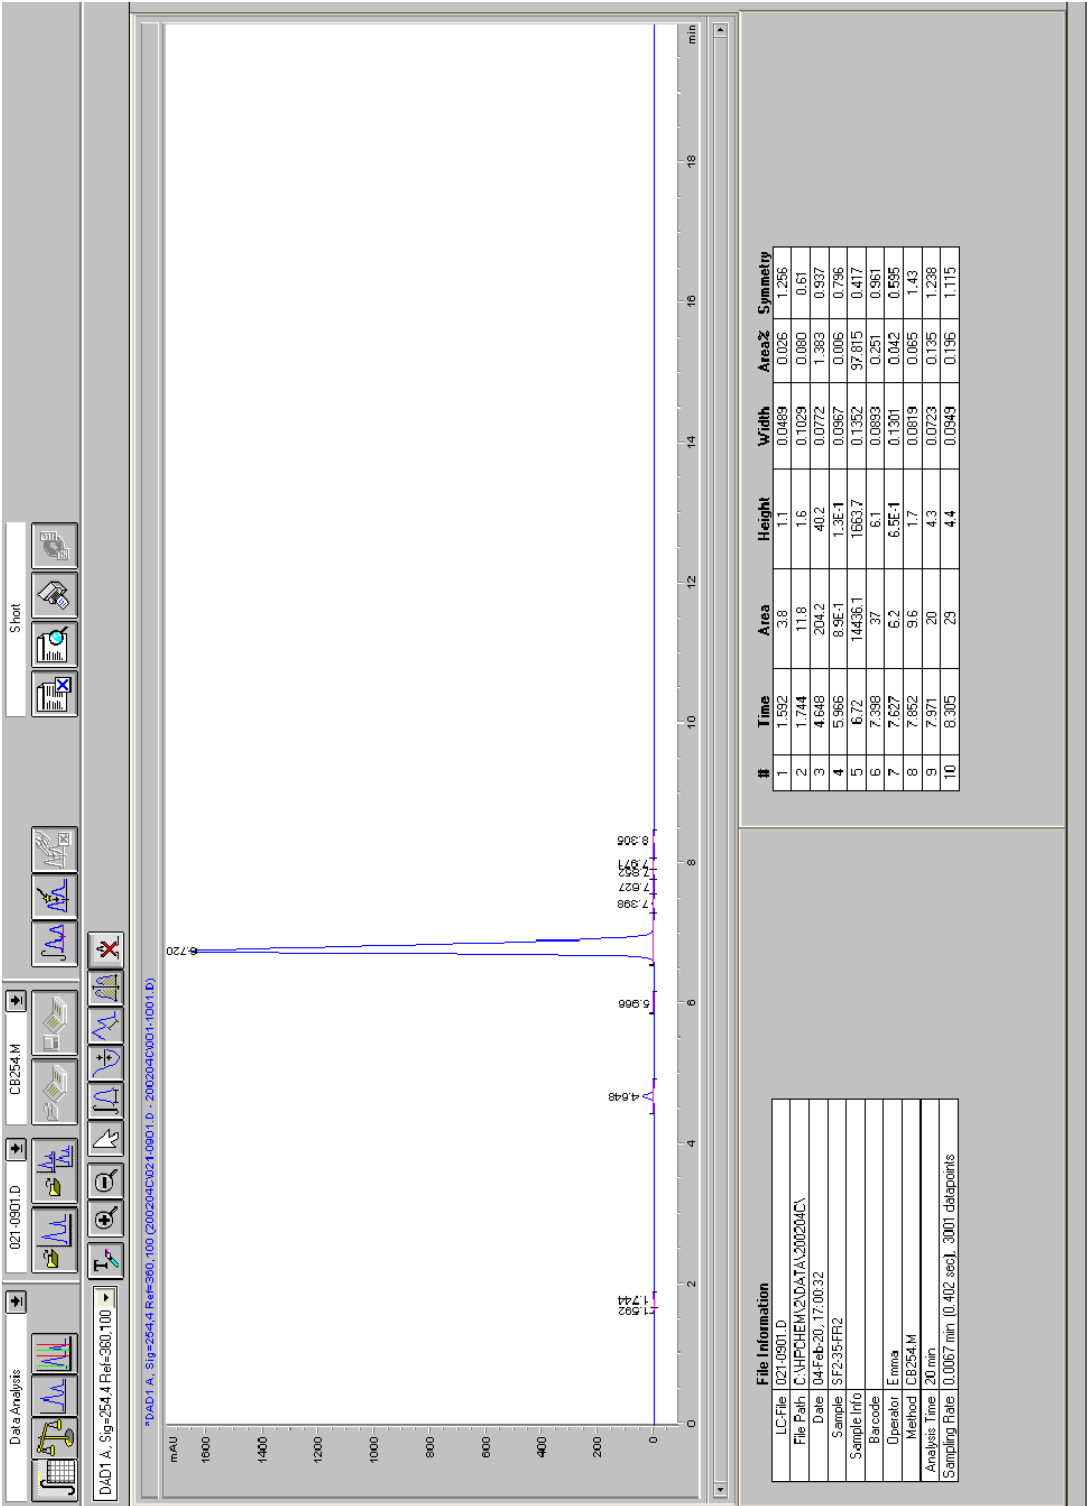

$^1\text{H}$  NMR of Methyl (*R*)-2-((4-methoxy-*N*-(pyridine-3-ylmethyl) phenyl) sulfonamido) pent-4-ynoate (**14**).

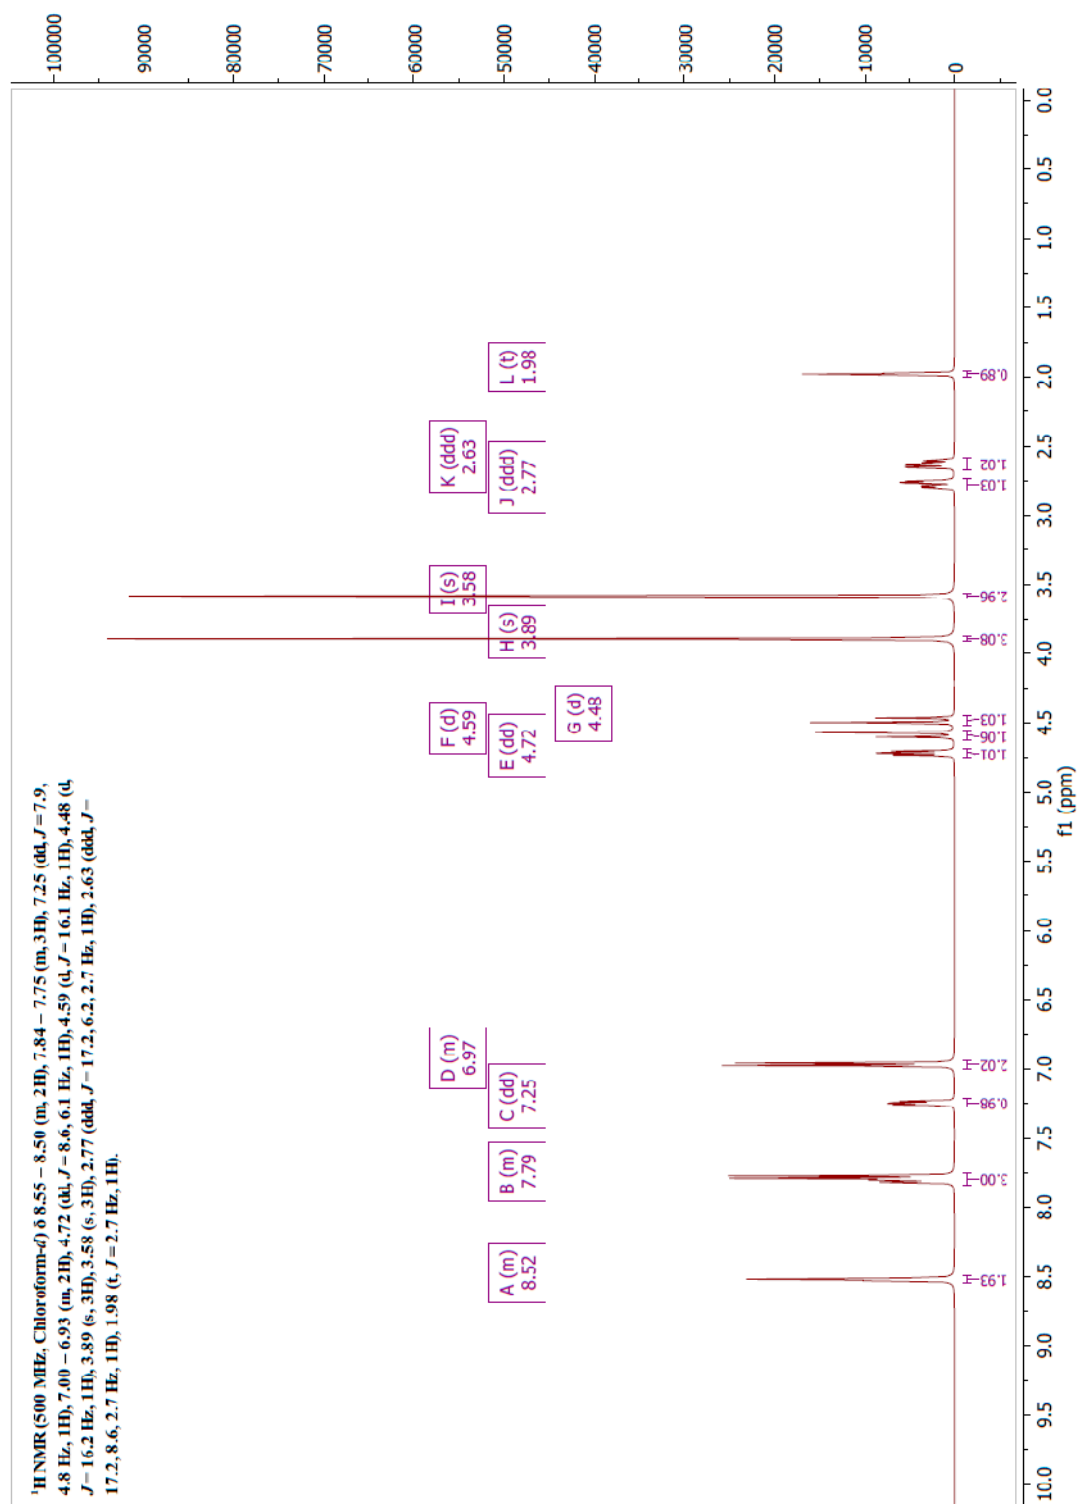

$^{13}\text{C}$  NMR of Methyl (*R*)-2-((4-methoxy-*N*-(pyridine-3-ylmethyl) phenyl) sulfonamido) pent-4-ynoate

(14).

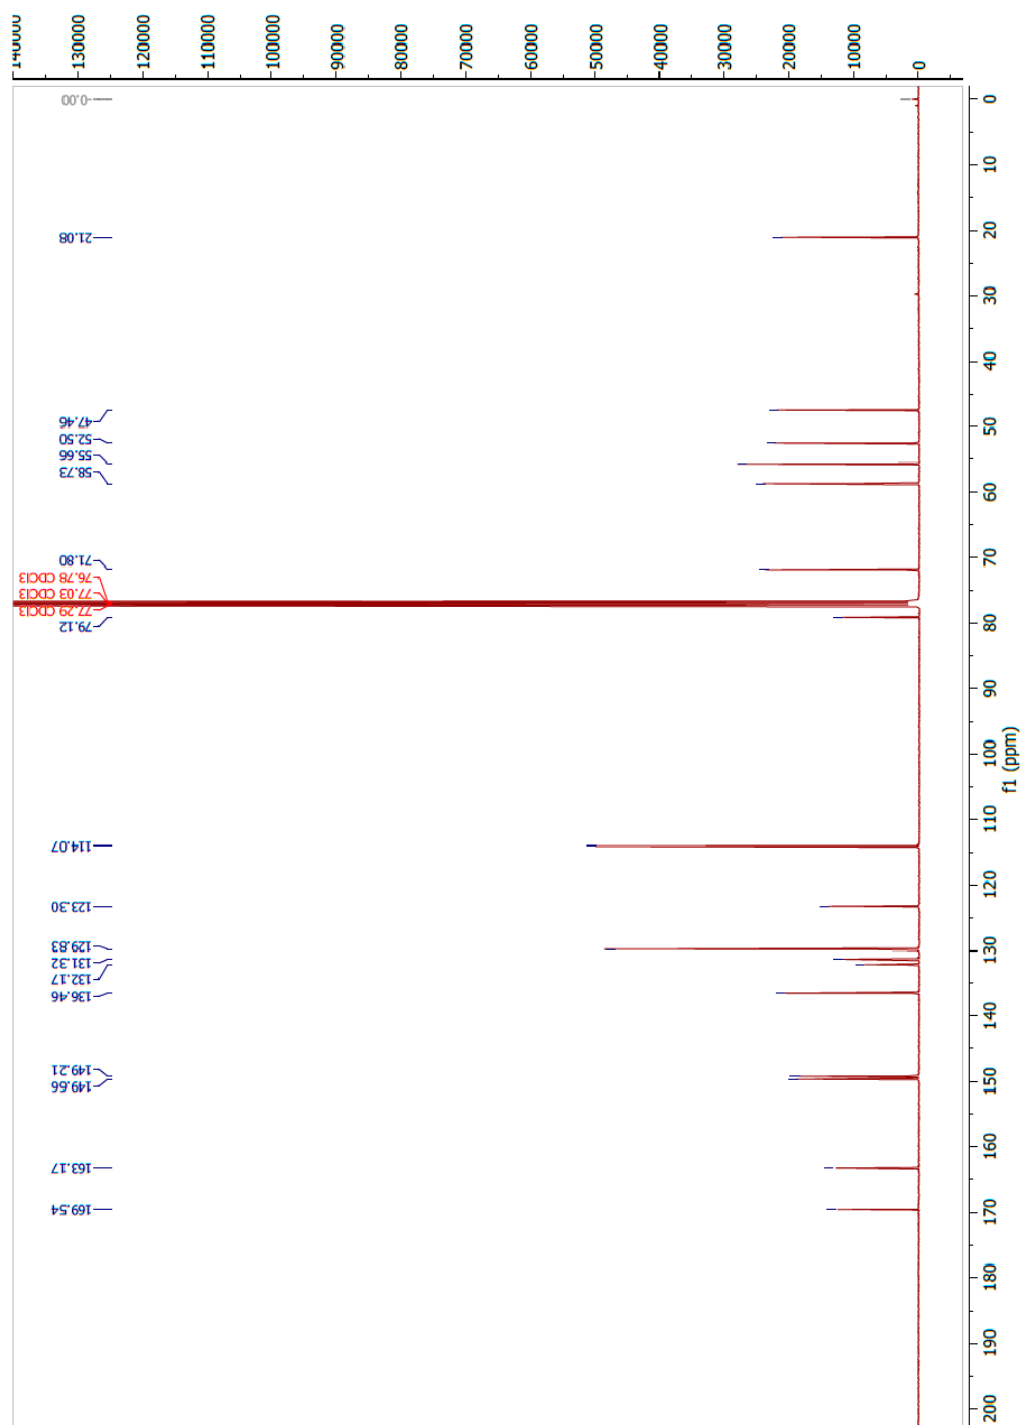



HRMS of Methyl (*R*)-2-((4-methoxy-*N*-(pyridine-3-ylmethyl) phenyl) sulfonamido) pent-4-ynoate (**14**).

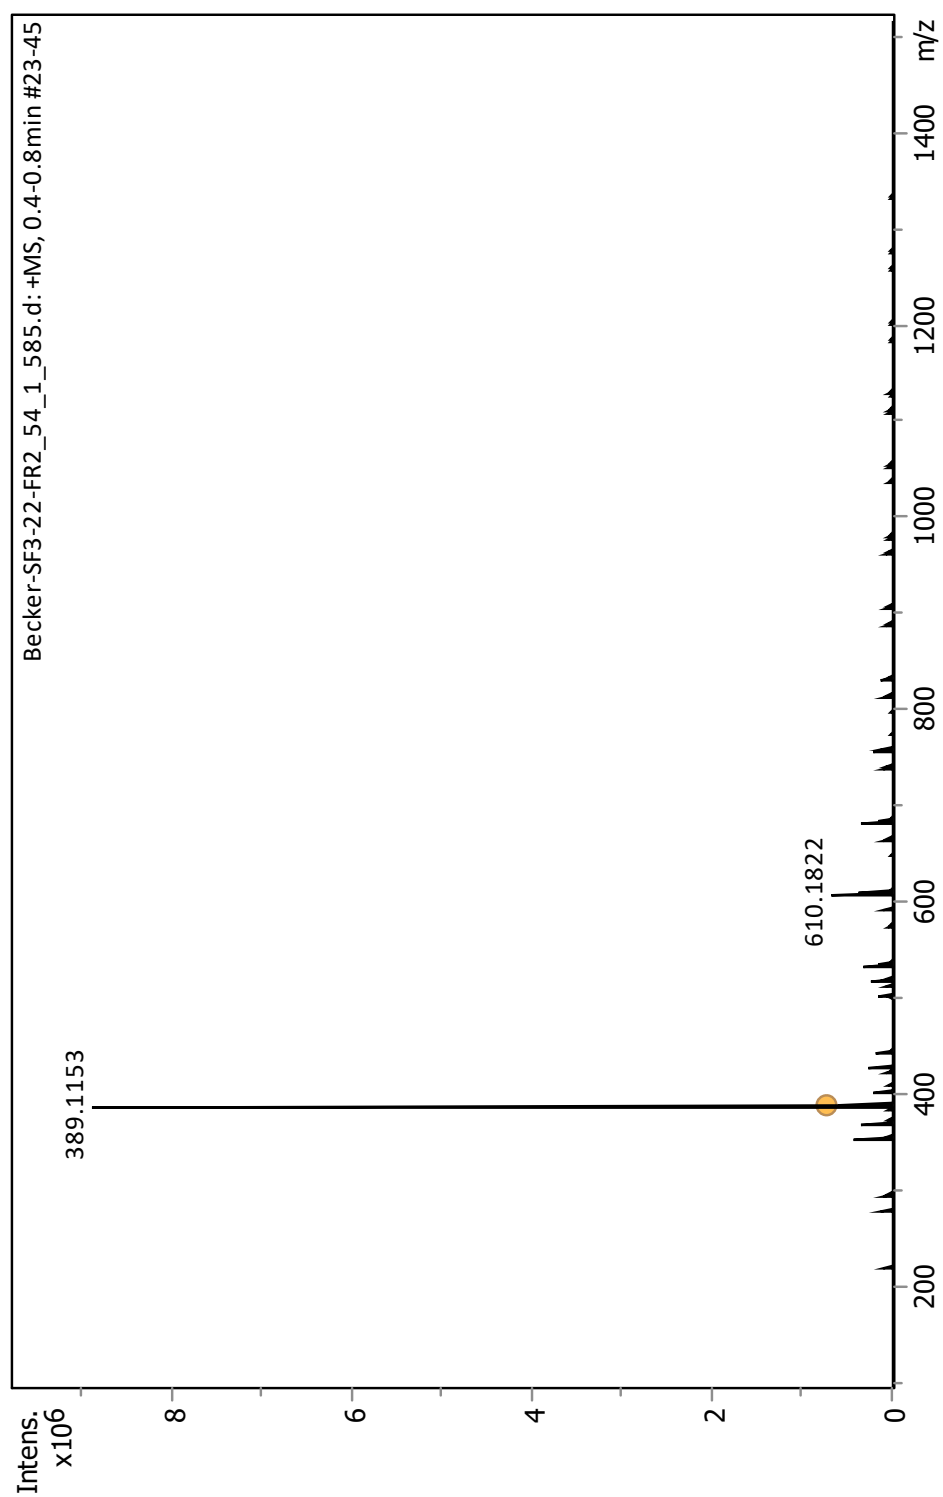

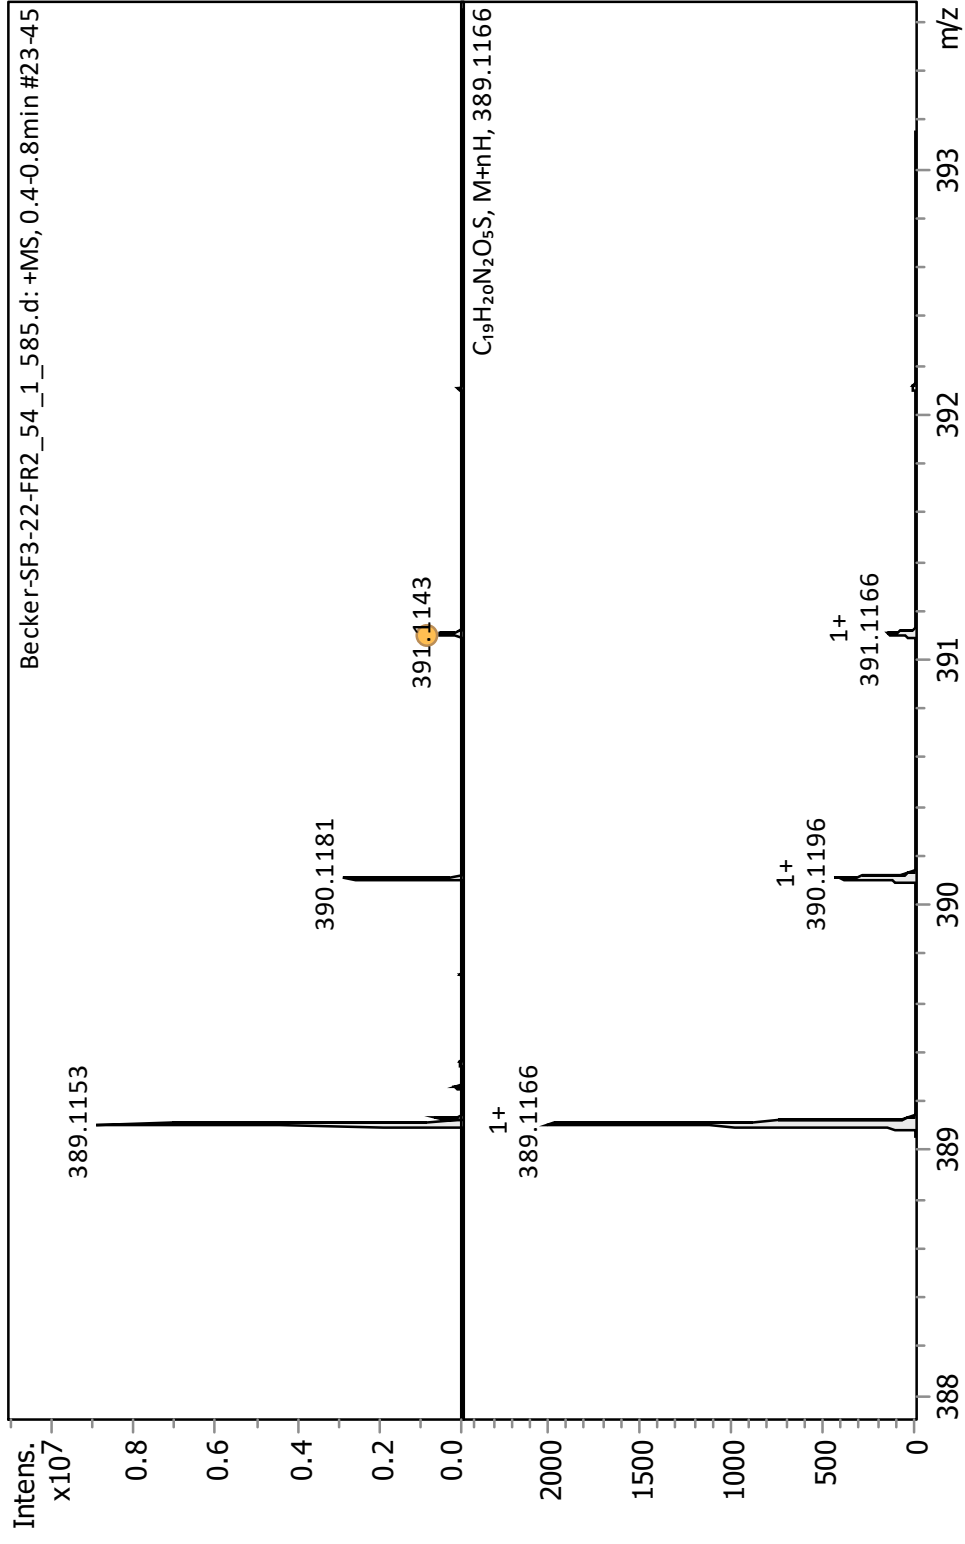

HPLC of (R)-2-((4-methoxy-N-(pyridin-3-ylmethyl)phenyl)sulfonamido)pent-4-ynoic acid (**15**).

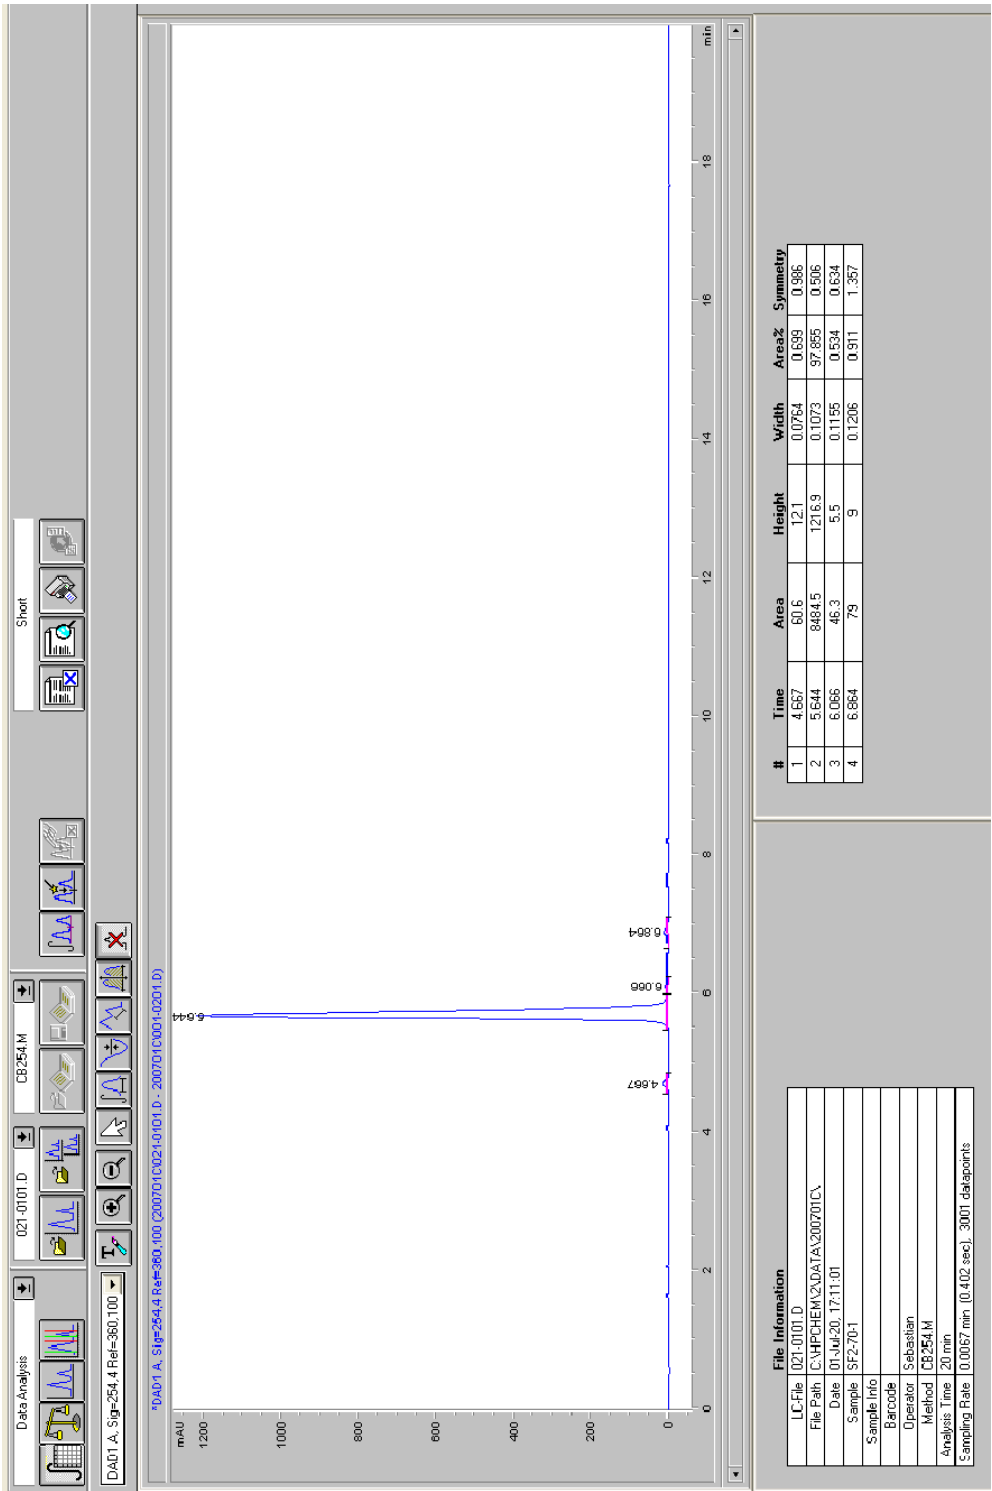

$^1\text{H}$  NMR of (R)-2-((4-methoxy-N-(pyridin-3-ylmethyl)phenyl)sulfonamido)pent-4-ynoic acid (**15**).

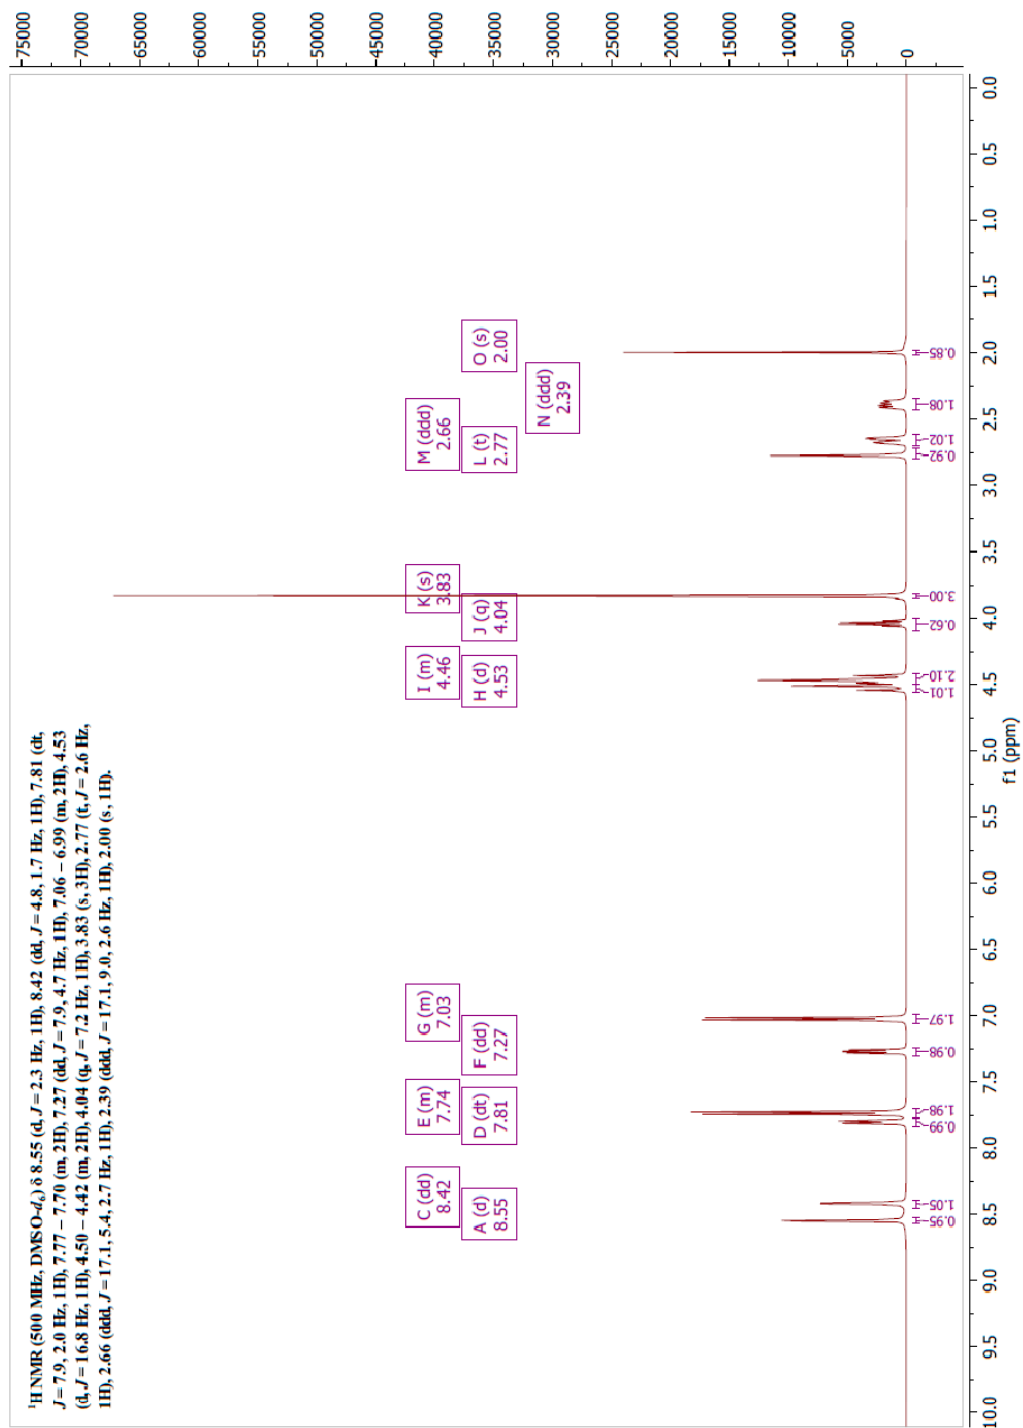

$^{13}\text{C}$  NMR of (R)-2-((4-methoxy-N-(pyridin-3-ylmethyl)phenyl)sulfonamido)pent-4-ynoic acid (**15**).

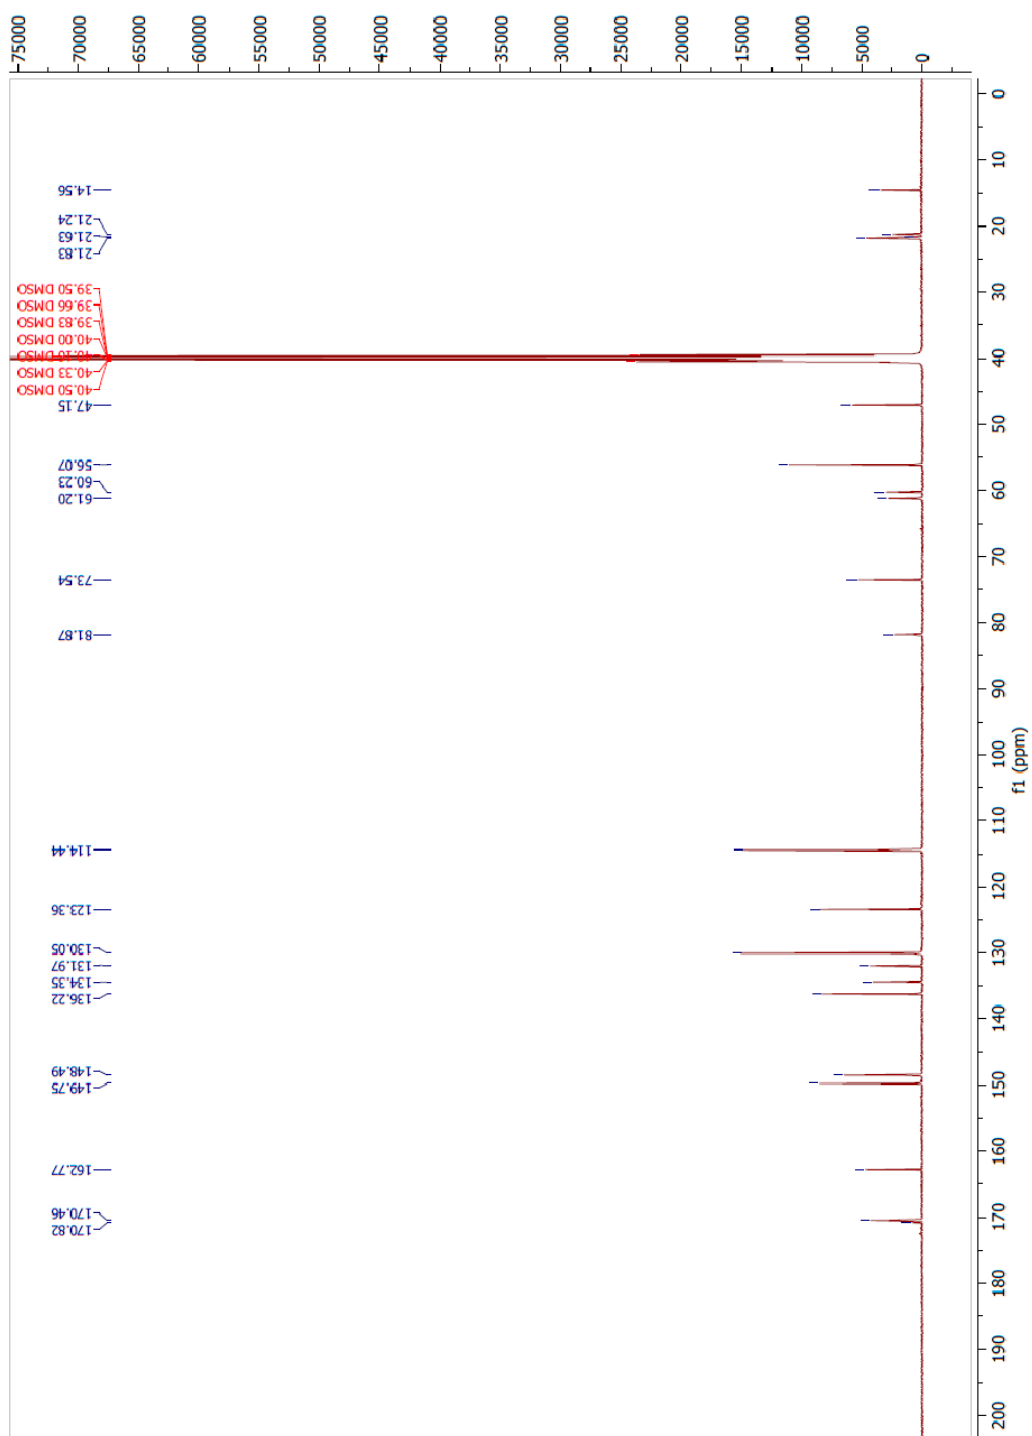

HRMS of (R)-2-((4-methoxy-N-(pyridin-3-ylmethyl)phenyl)sulfonamido)pent-4-ynoic acid (**15**).

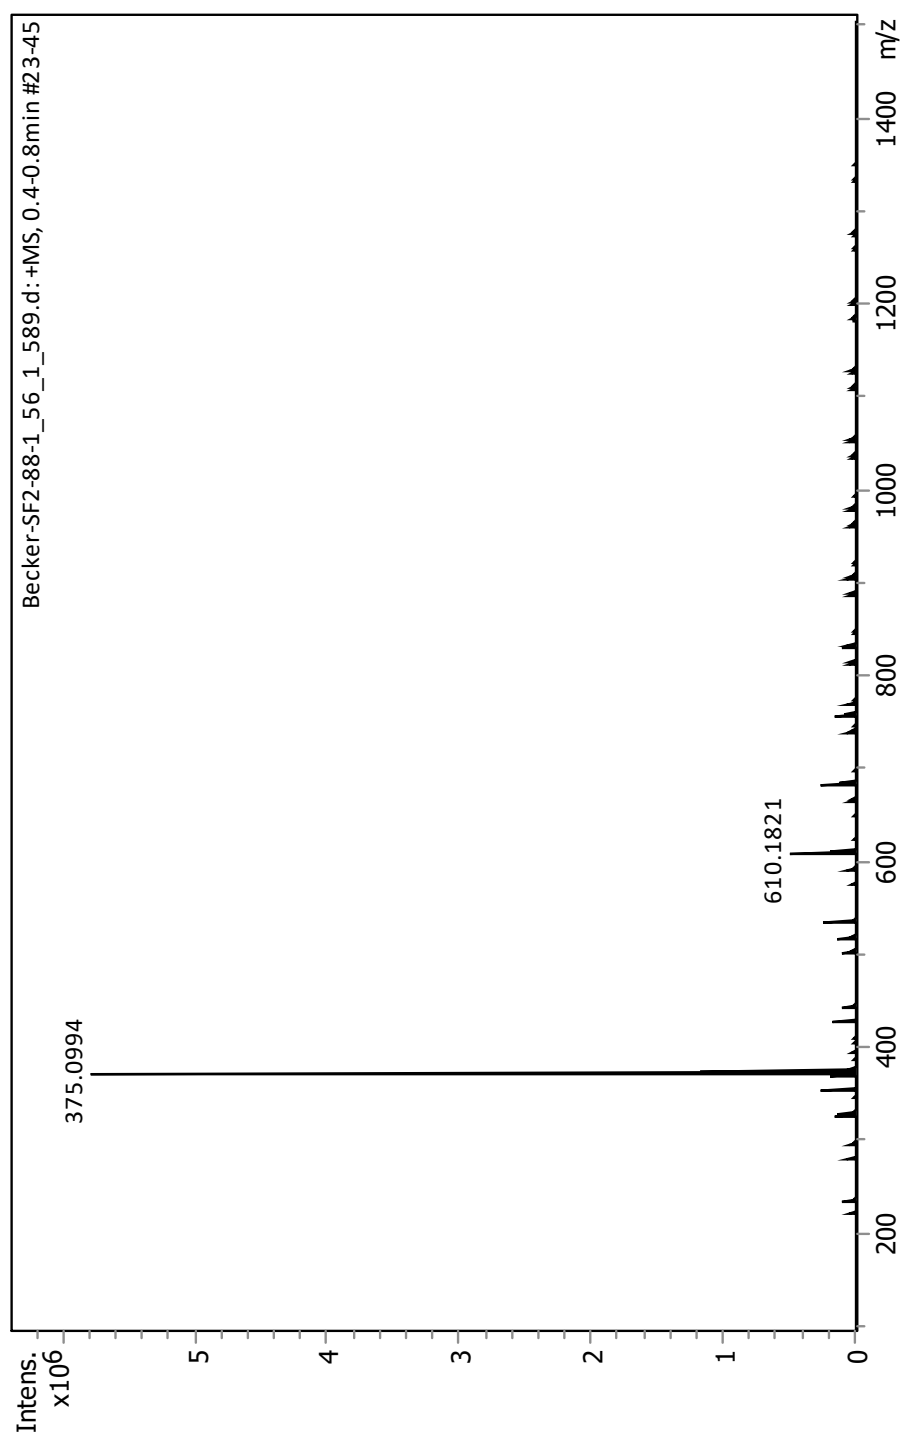

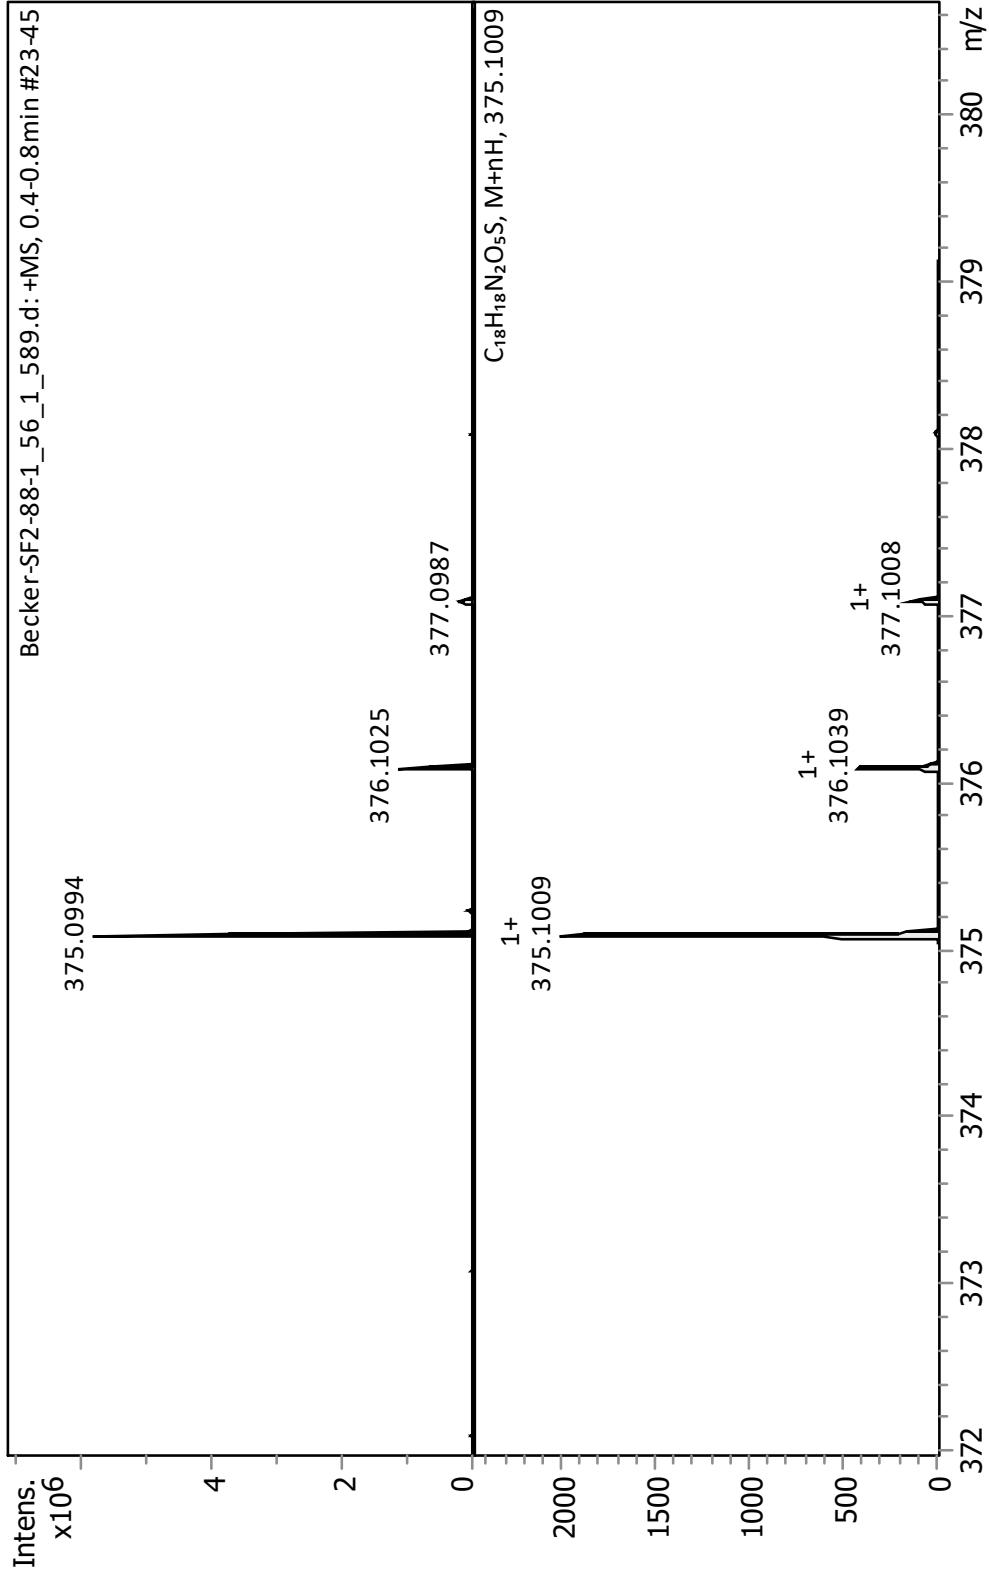

HPLC of 4-methoxy-N-((2R)-1-oxo-1-(((tetrahydro-2H-pyran-2-yl)oxy)-l2-azaneyl)pent-4-yn-2-yl)-N-(pyridin-3-ylmethyl)benzenesulfonamide (**16**).

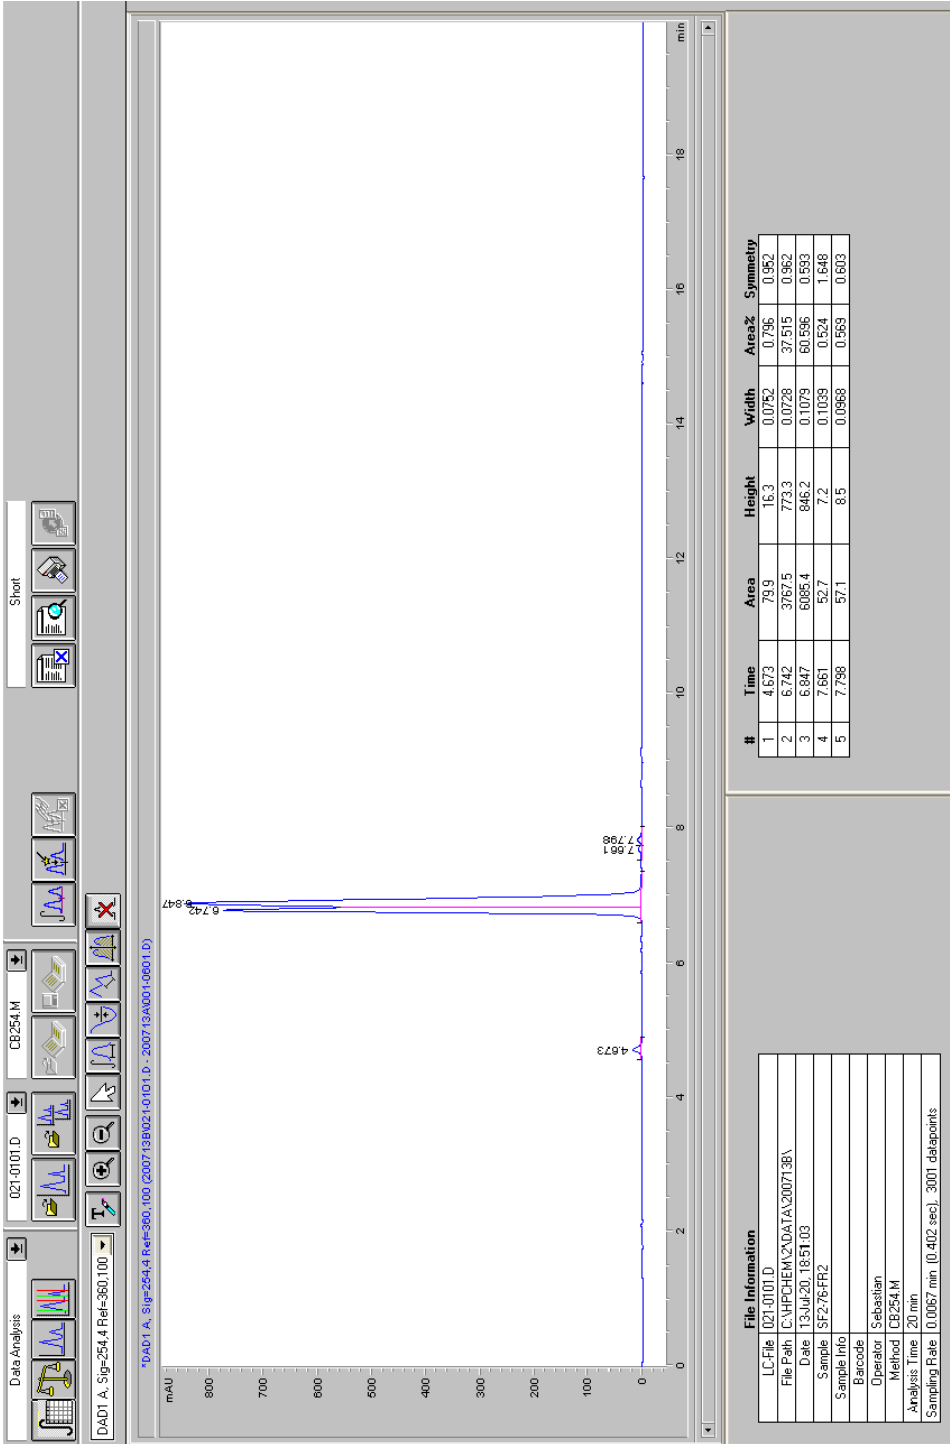



$^1\text{H}$  NMR of 4-methoxy-N-((2R)-1-oxo-1-(((tetrahydro-2H-pyran-2-yl)oxy)-l2-azaneyl)pent-4-yn-2-yl)-N-(pyridin-3-ylmethyl)benzenesulfonamide (**16**).

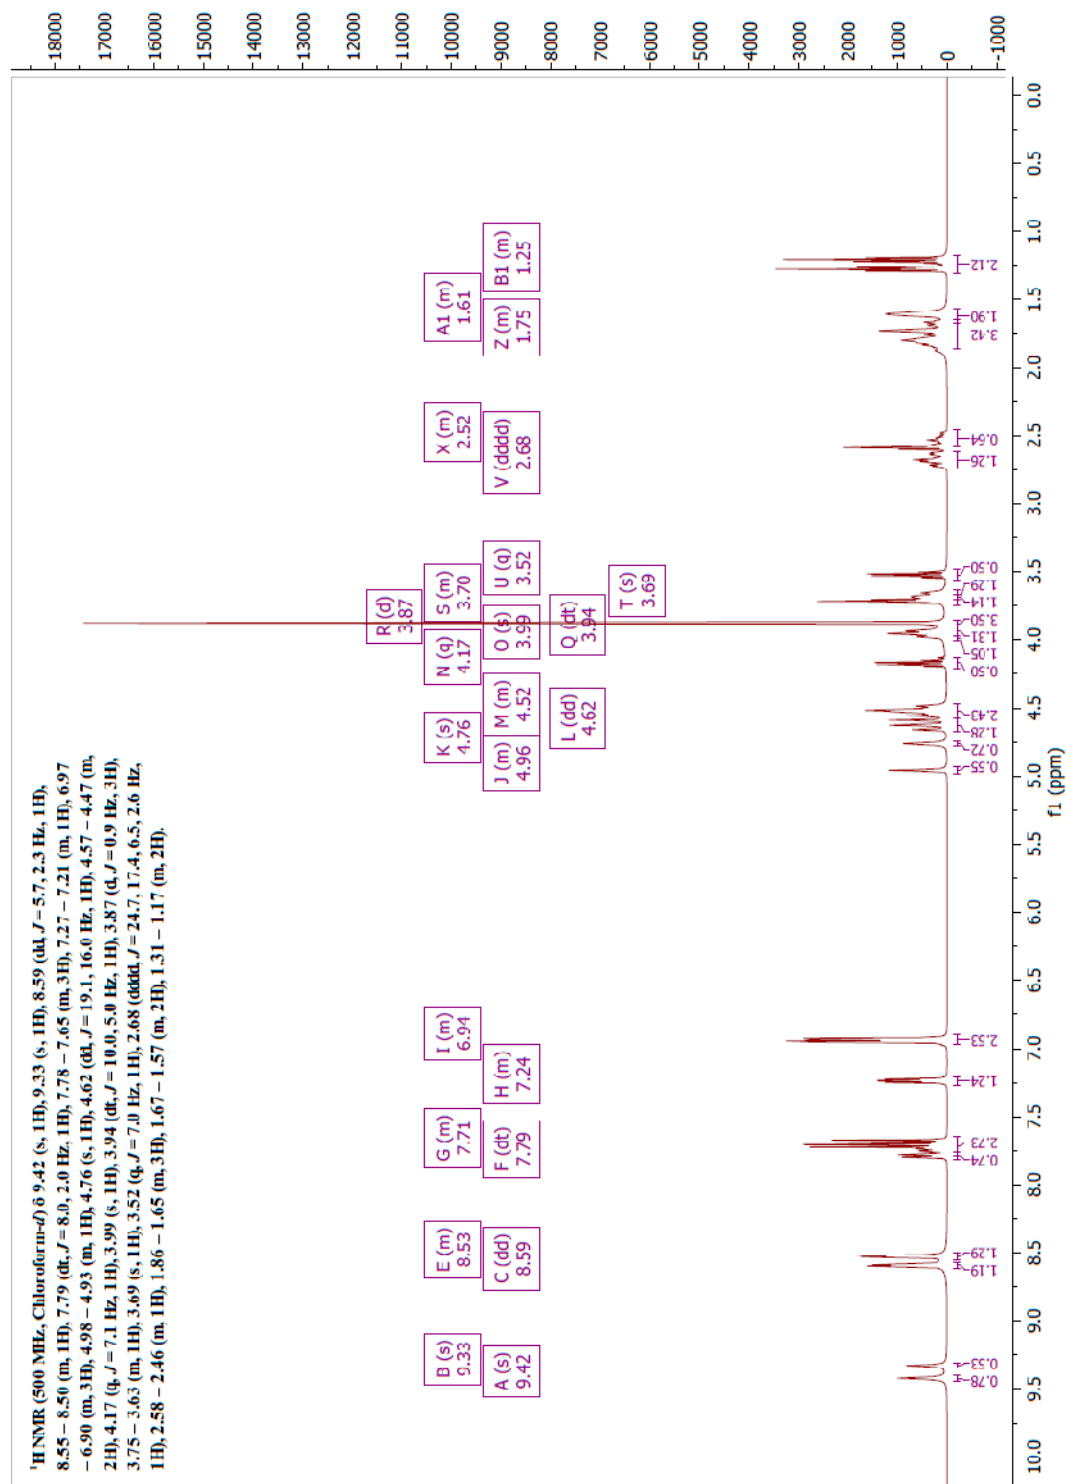

$^{13}\text{C}$  NMR of 4-methoxy-N-((2R)-1-oxo-1-(((tetrahydro-2H-pyran-2-yl)oxy)-12-azaneyl)pent-4-yn-2-yl)-N-(pyridin-3-ylmethyl)benzenesulfonamide (**16**).

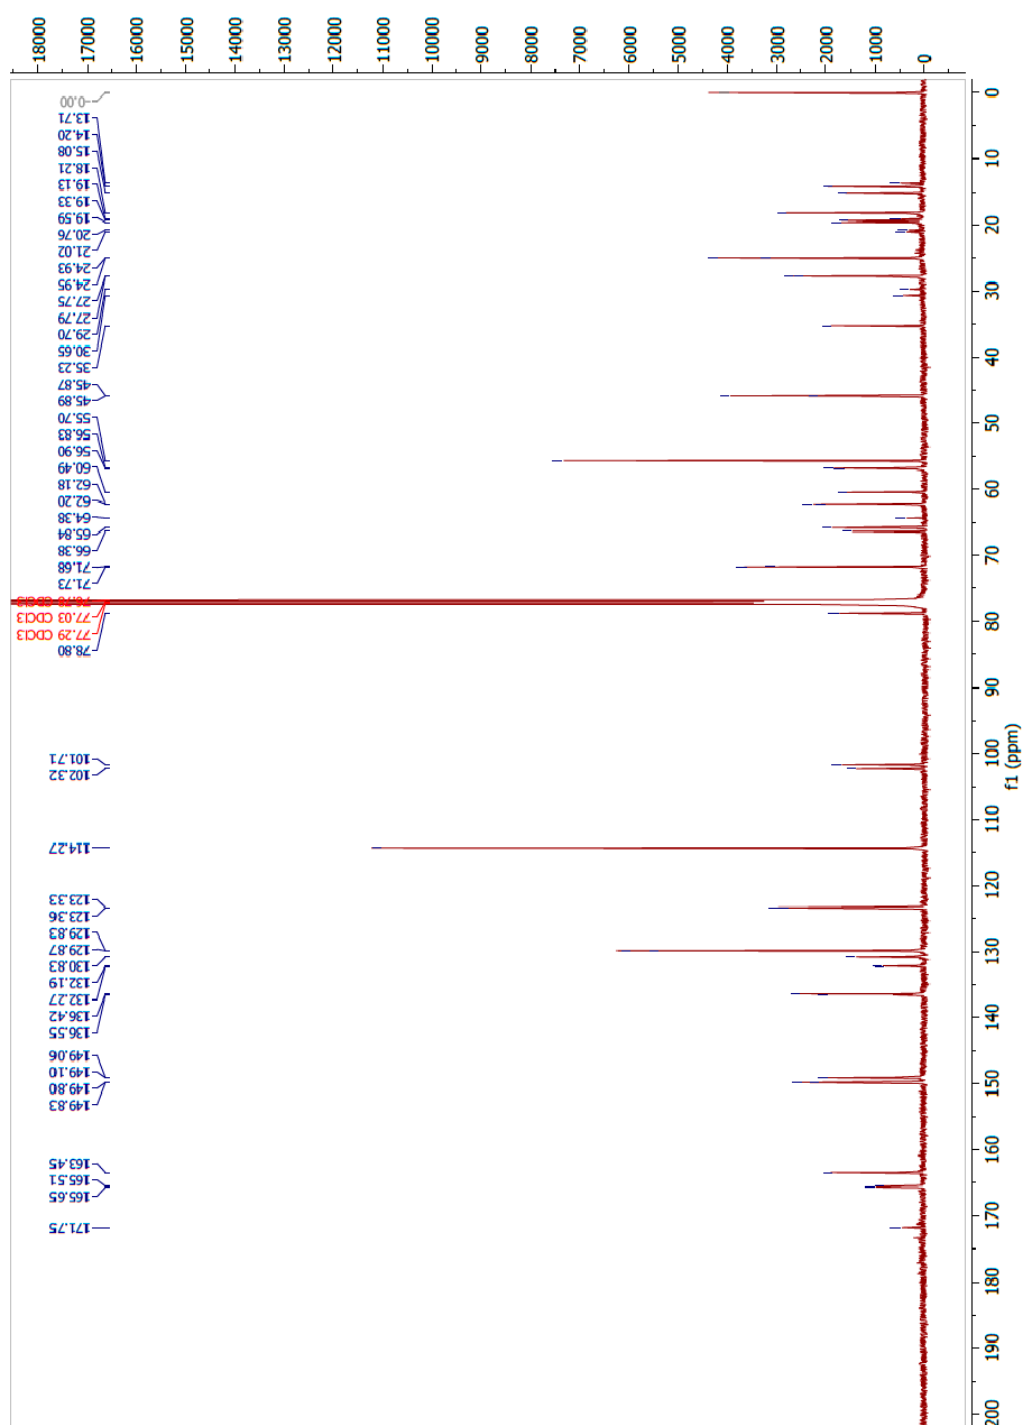

HRMS of 4-methoxy-N-((2R)-1-oxo-1-(((tetrahydro-2H-pyran-2-yl)oxy)-12-azanyl)pent-4-yn-2-yl)-N-(pyridin-3-ylmethyl)benzenesulfonamide (**16**).

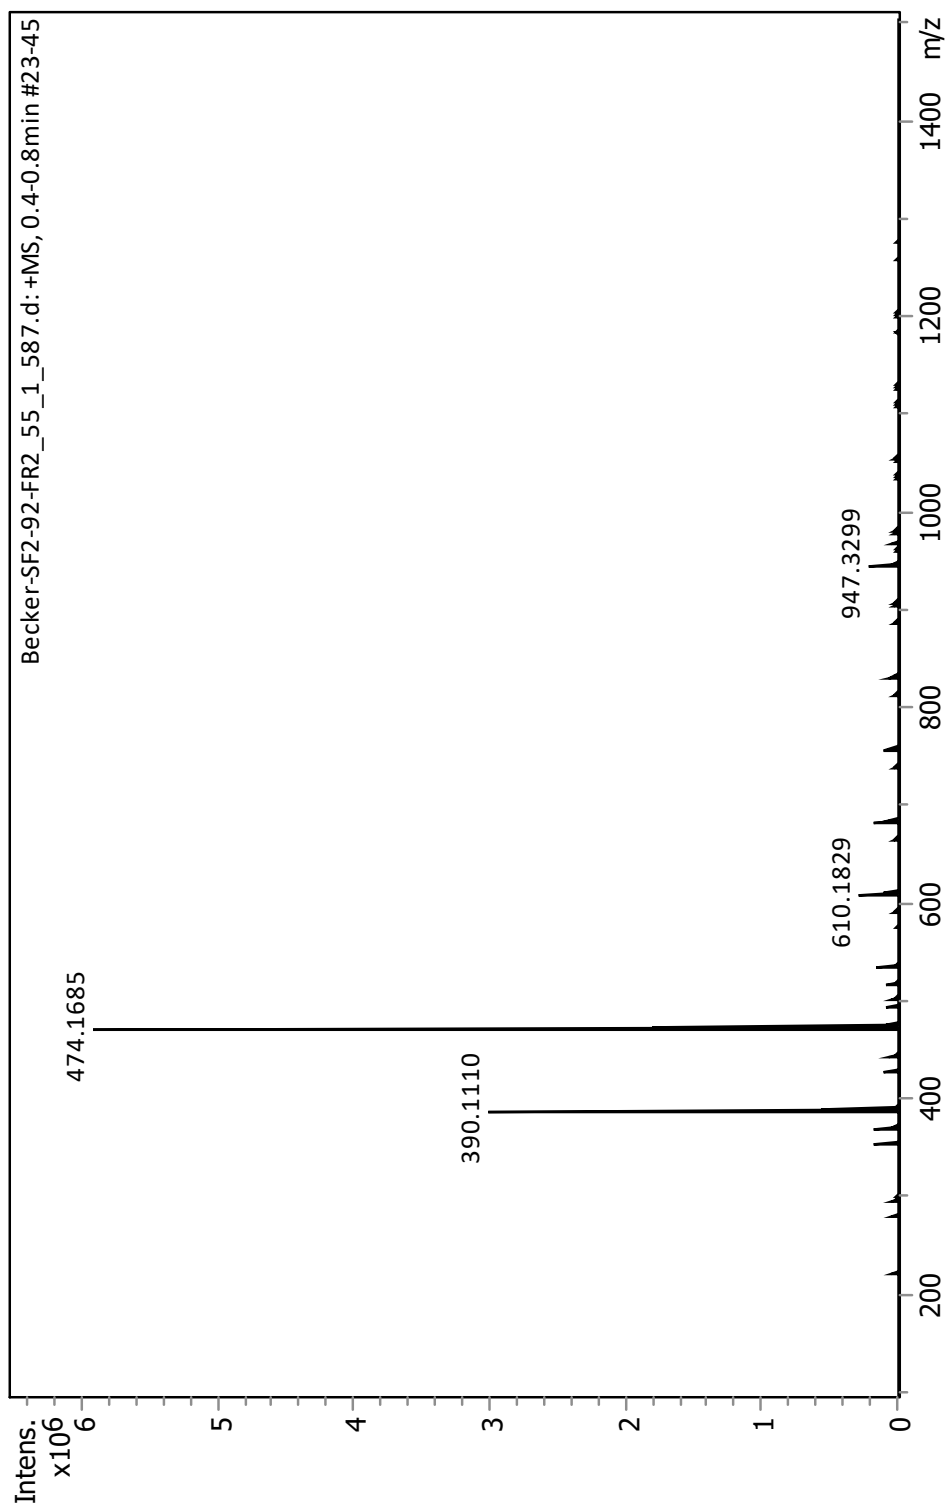

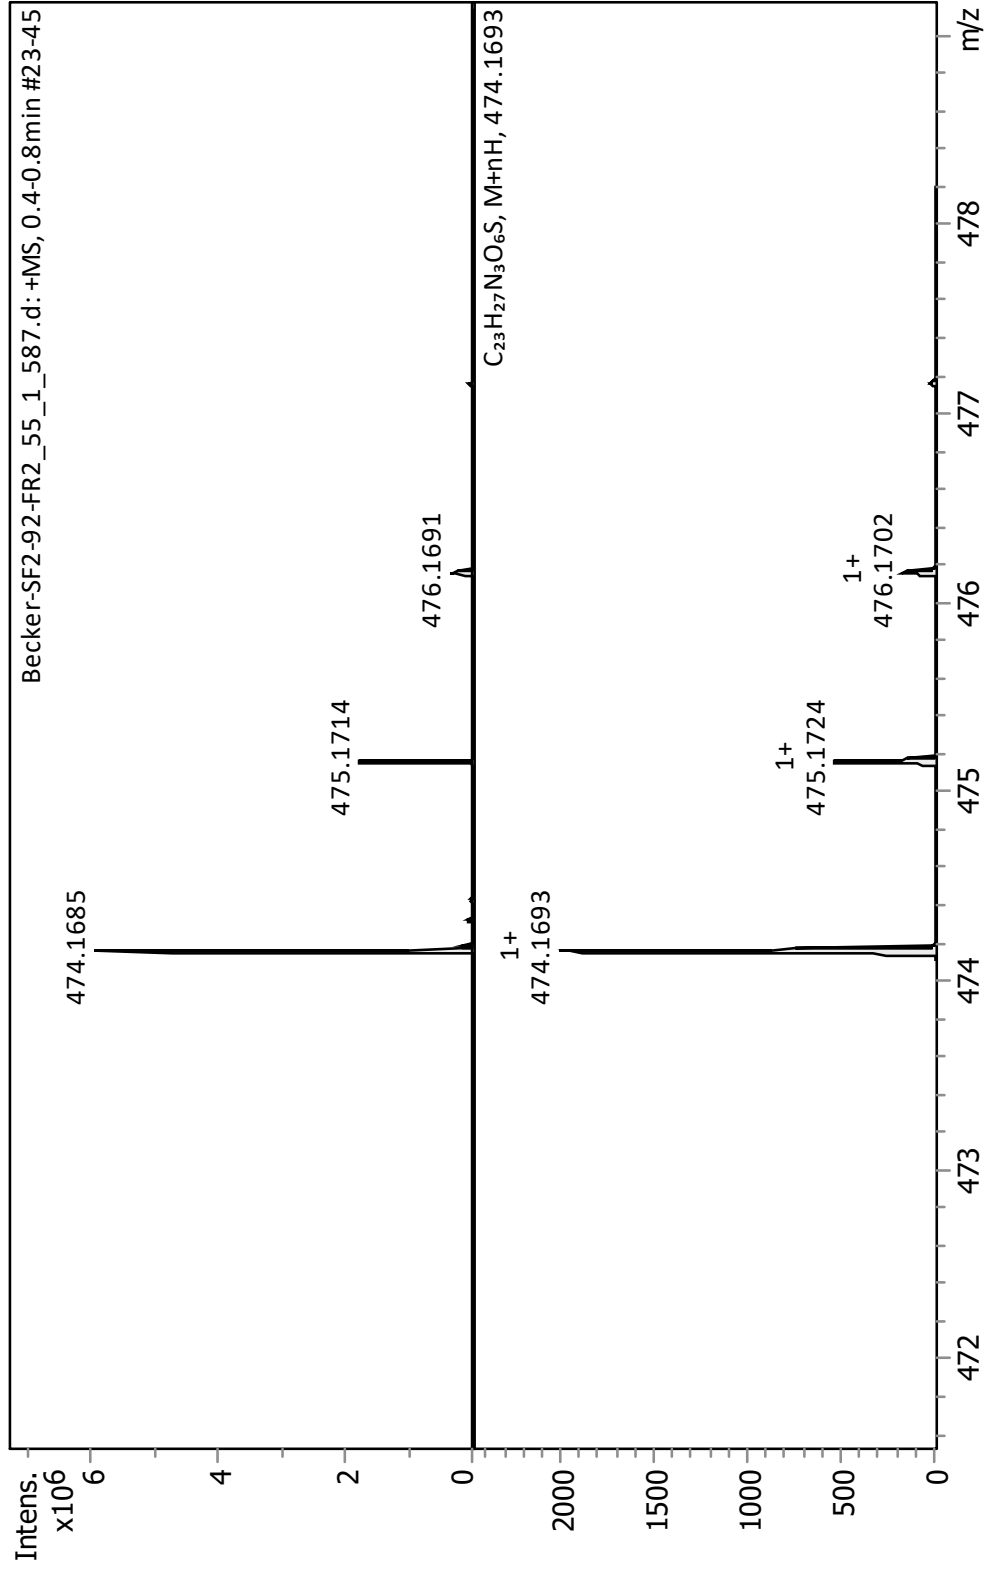

HPLC of THP-protected 1,4-Click Isomer **18**.

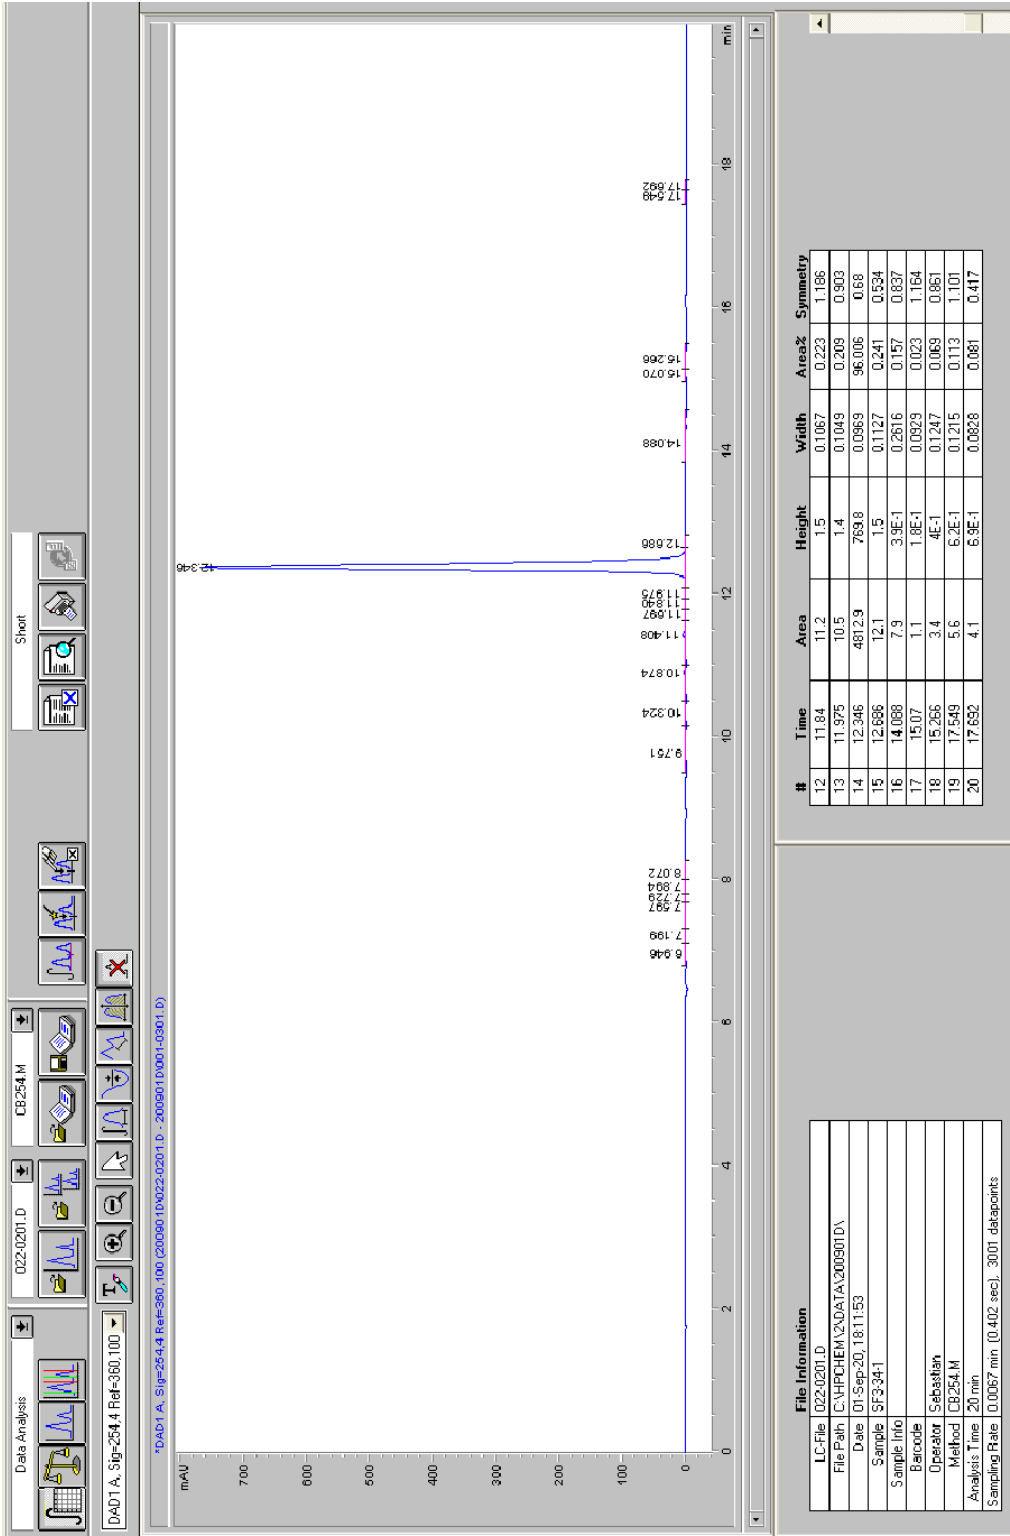

$^1\text{H}$  NMR of THP-protected 1,4-Click Isomer **18**.

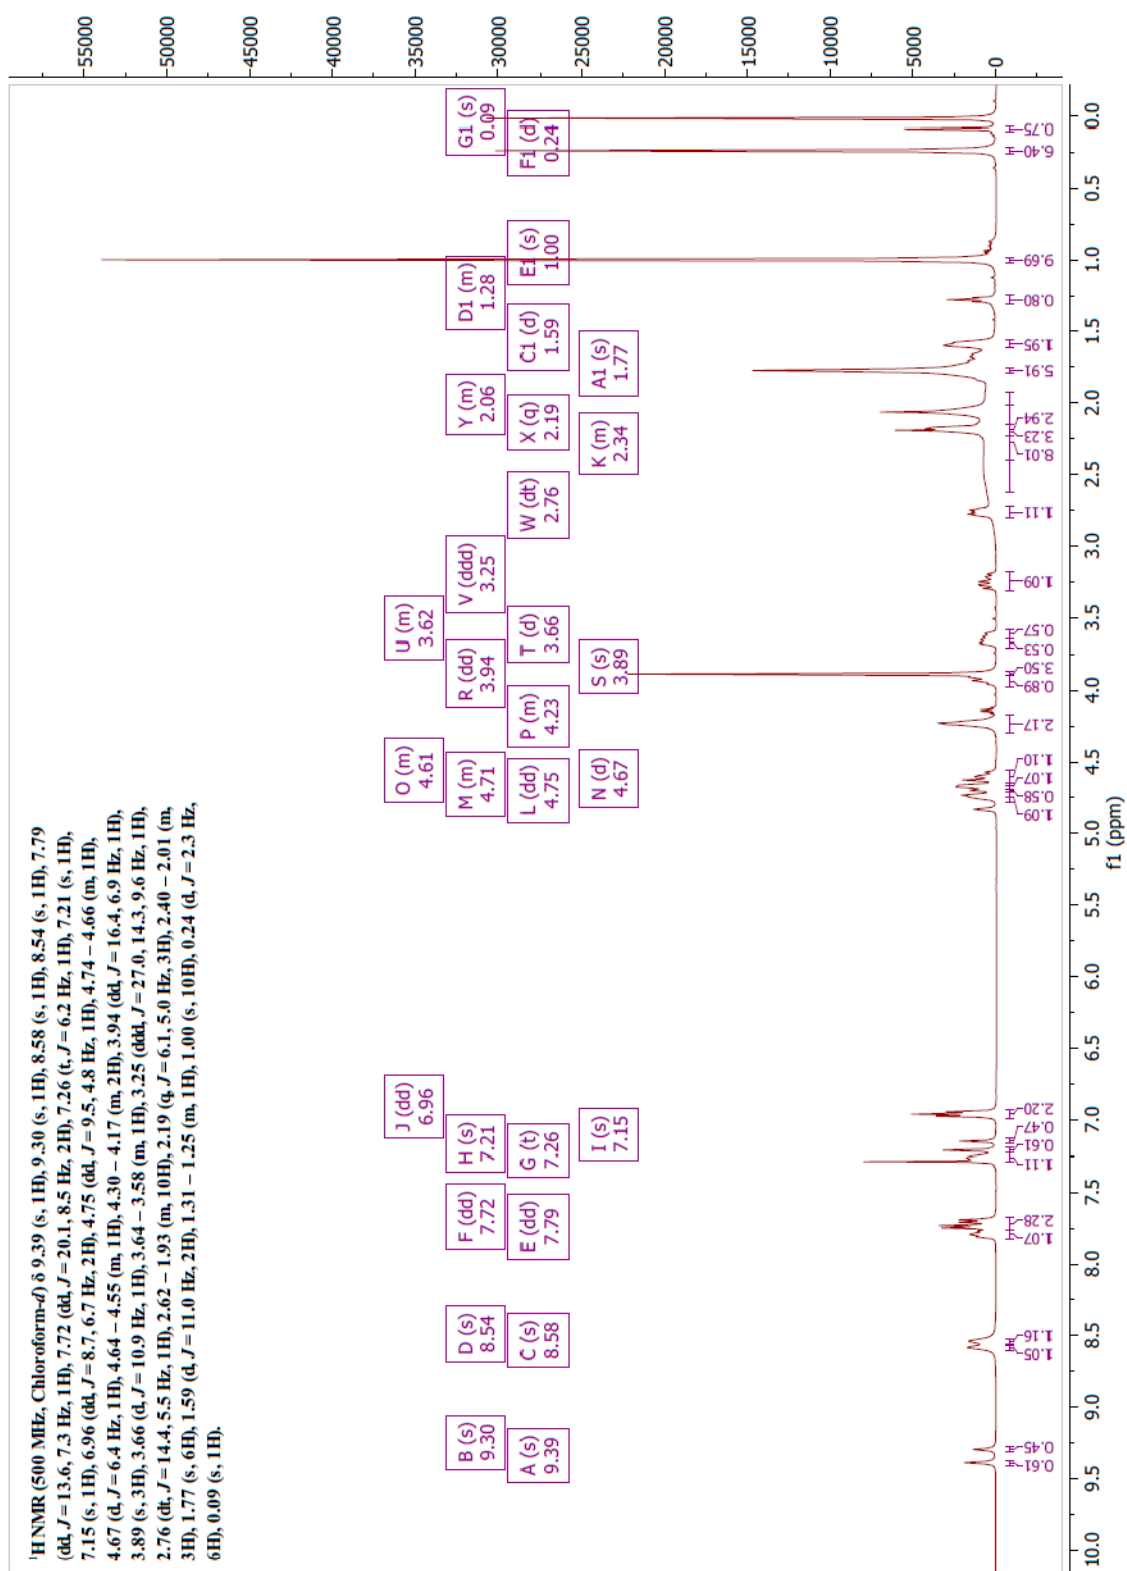

$^{13}\text{C}$  NMR of THP-protected 1,4-Click Isomer **18**.

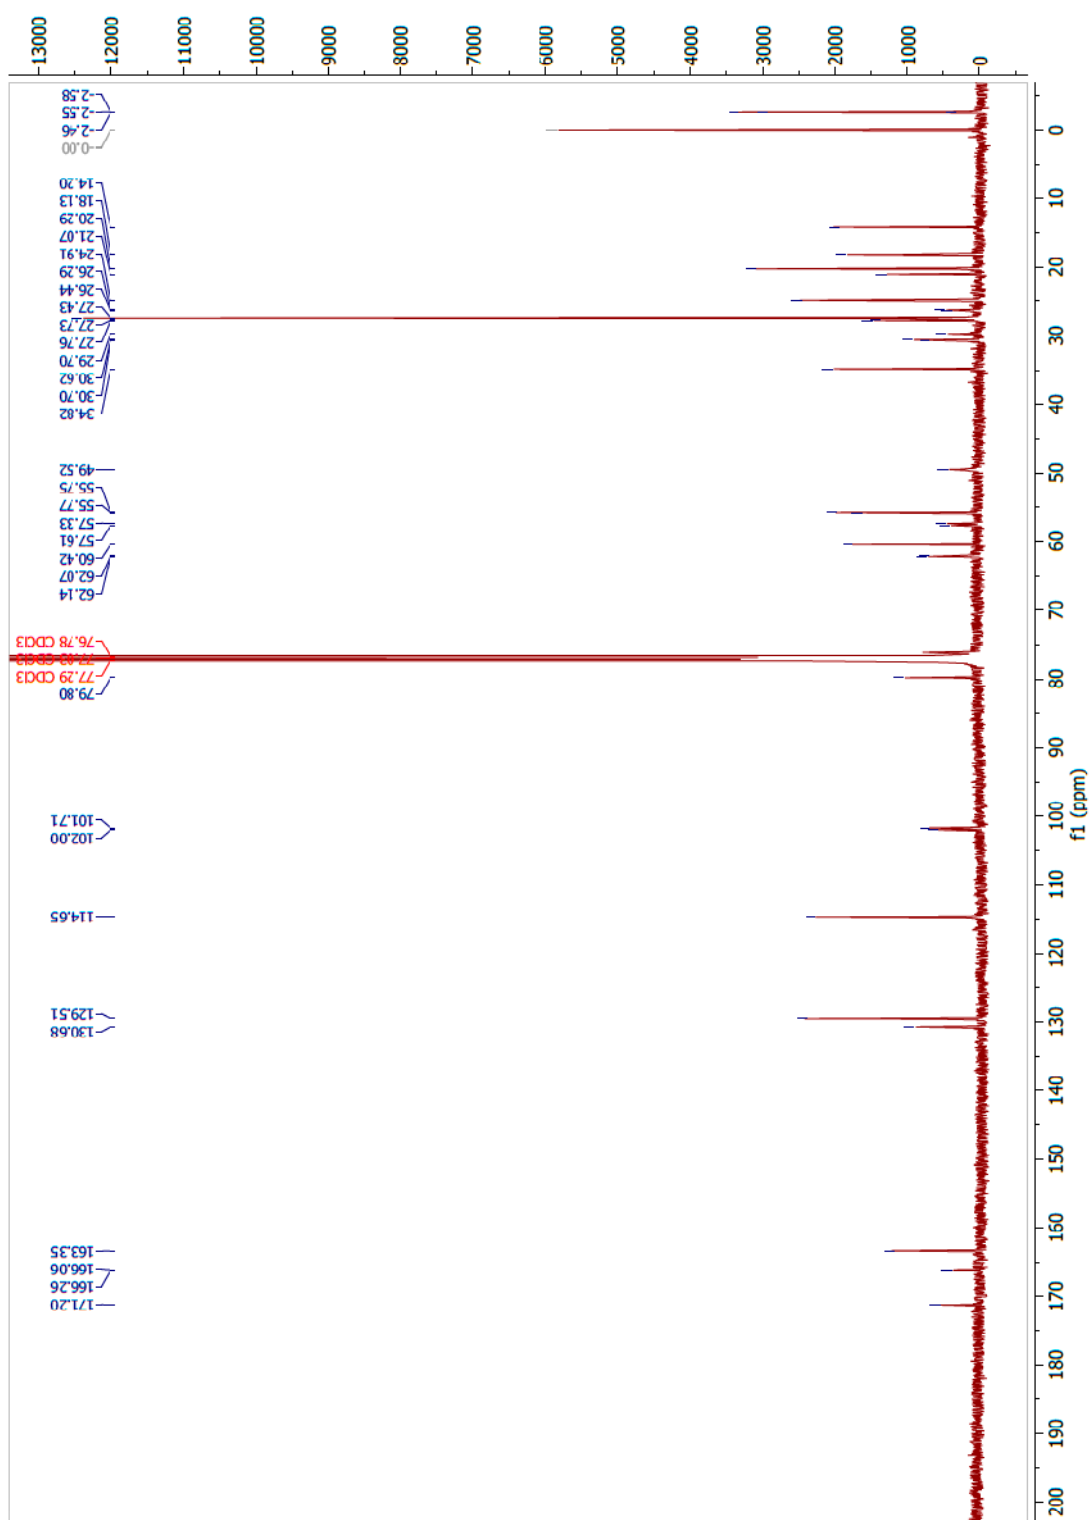

HRMS of THP-protected 1,4-Click Isomer **18**.

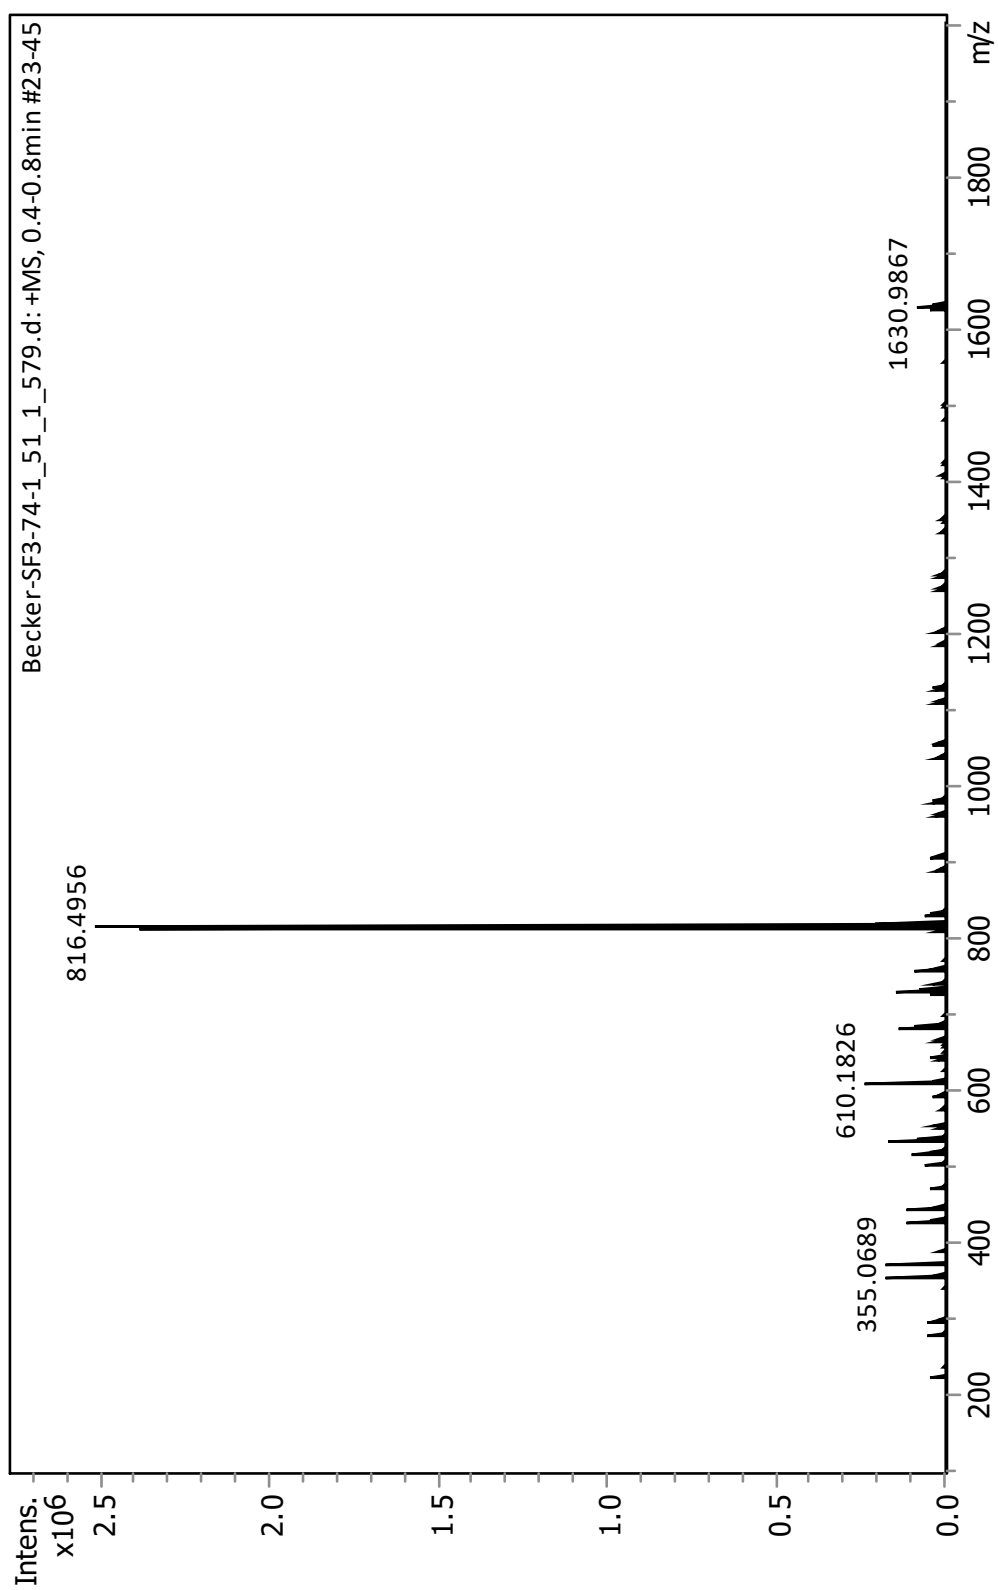



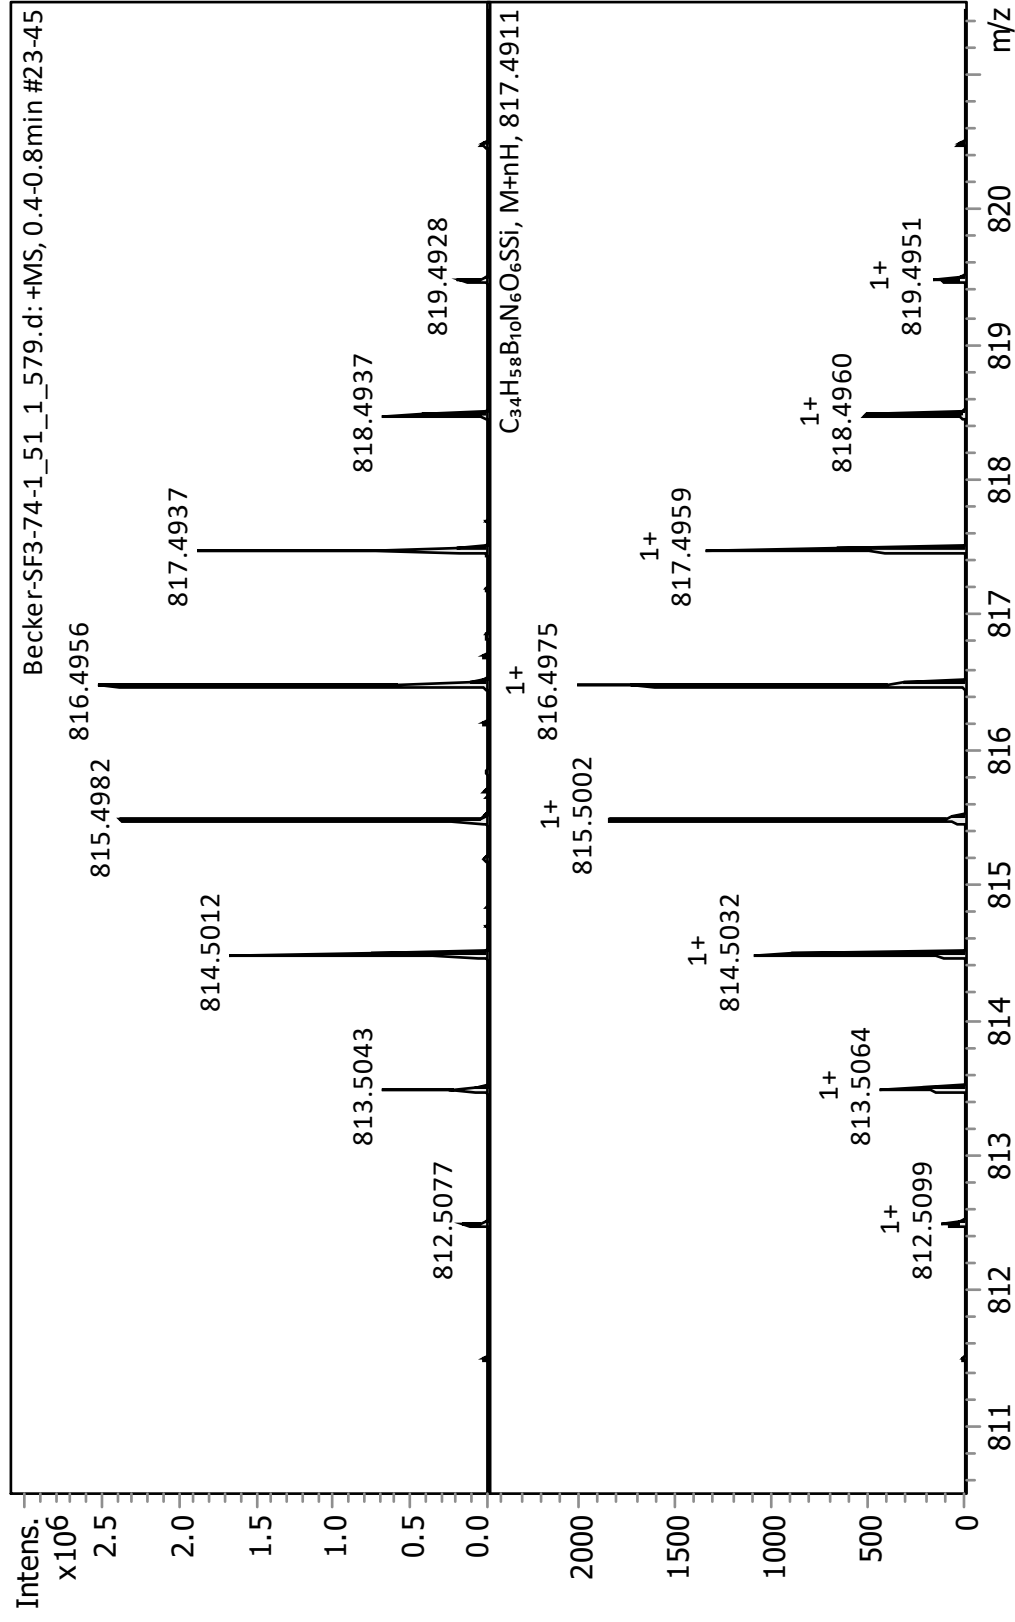

HPLC of Hydroxamic Acid 1,4-triazole 4.

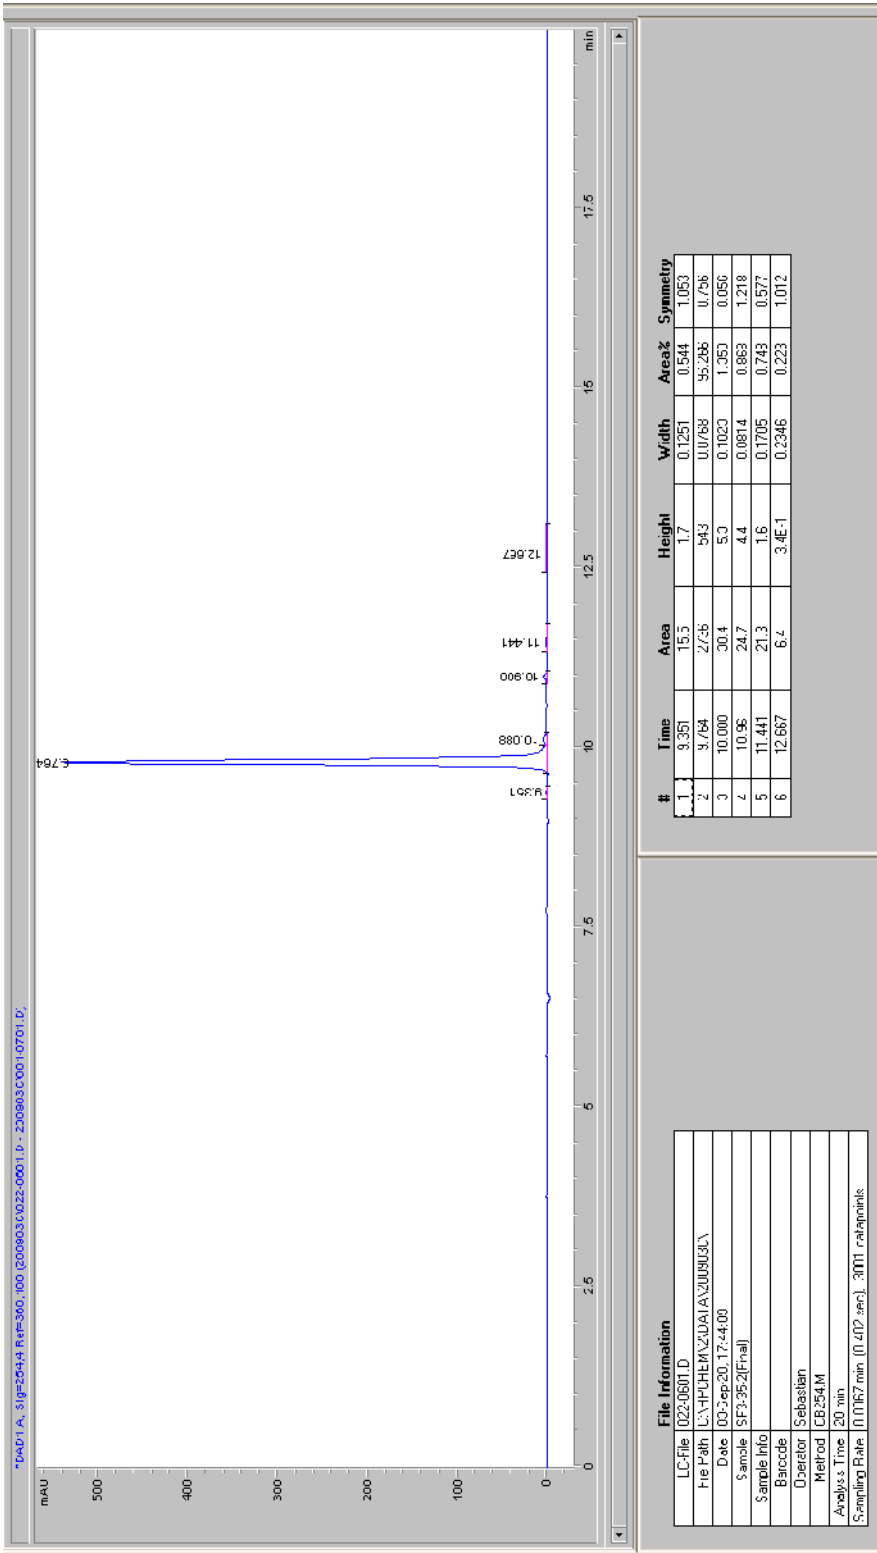

<sup>1</sup>H NMR of Hydroxamic Acid 1,4-triazole 4.

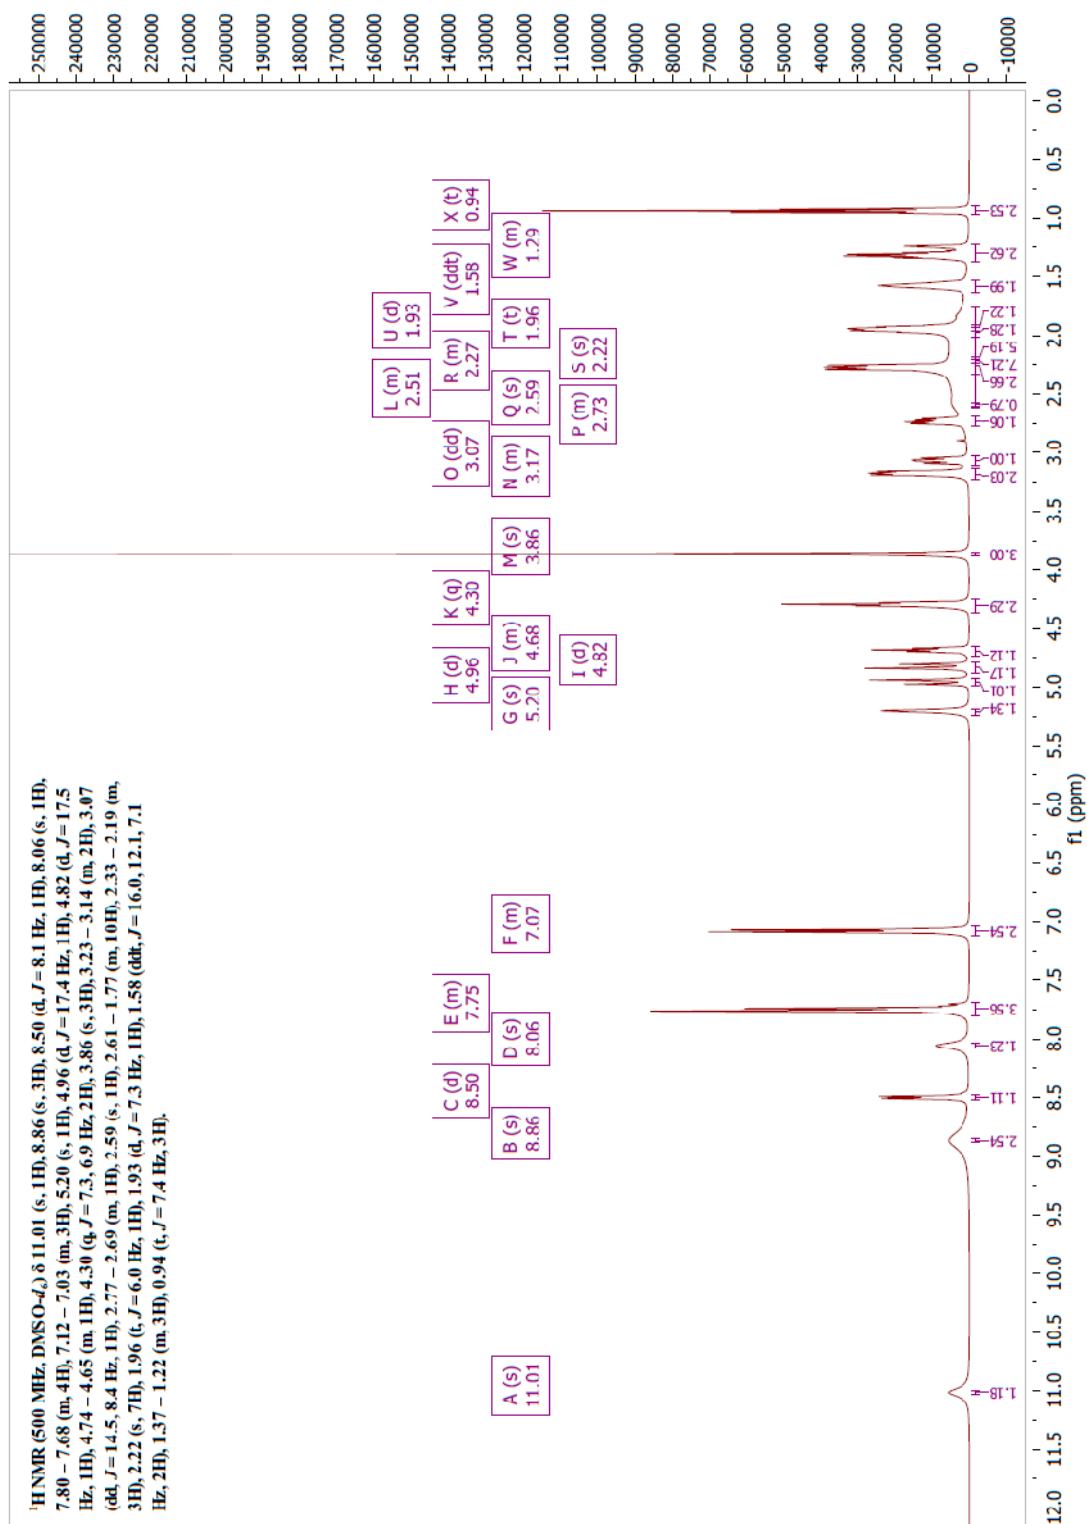

$^{13}\text{C}$  NMR of Hydroxamic Acid 1,4-triazole **4**.

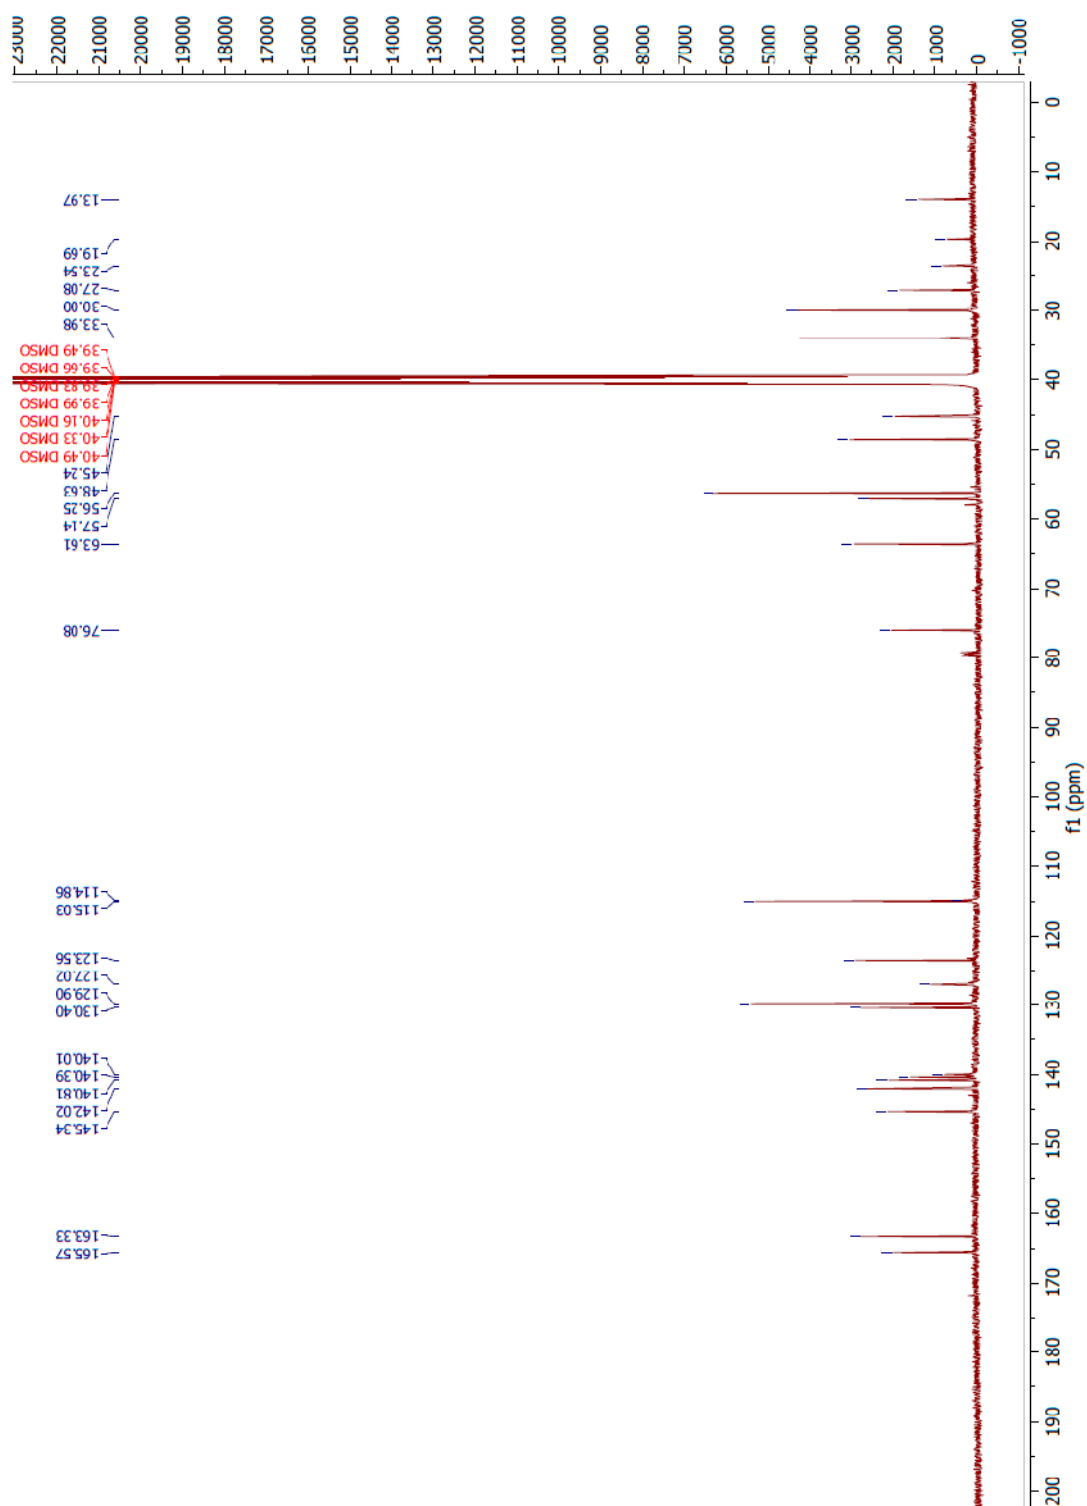

HRMS of Hydroxamic Acid 1,4-triazole **4**.

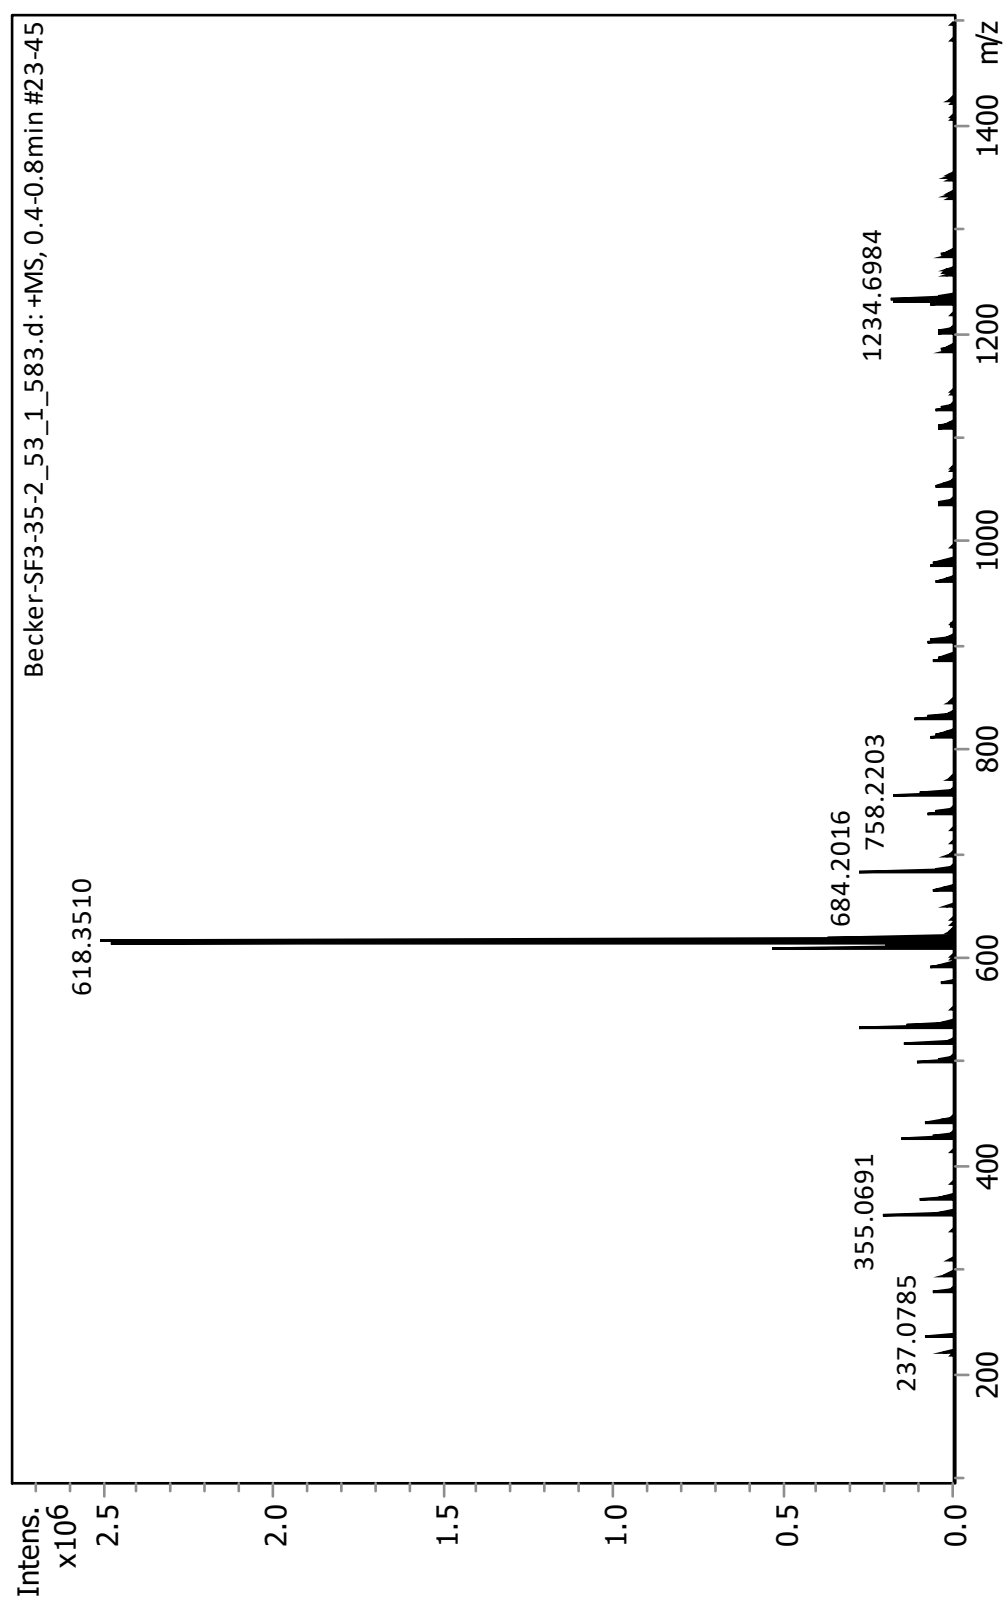

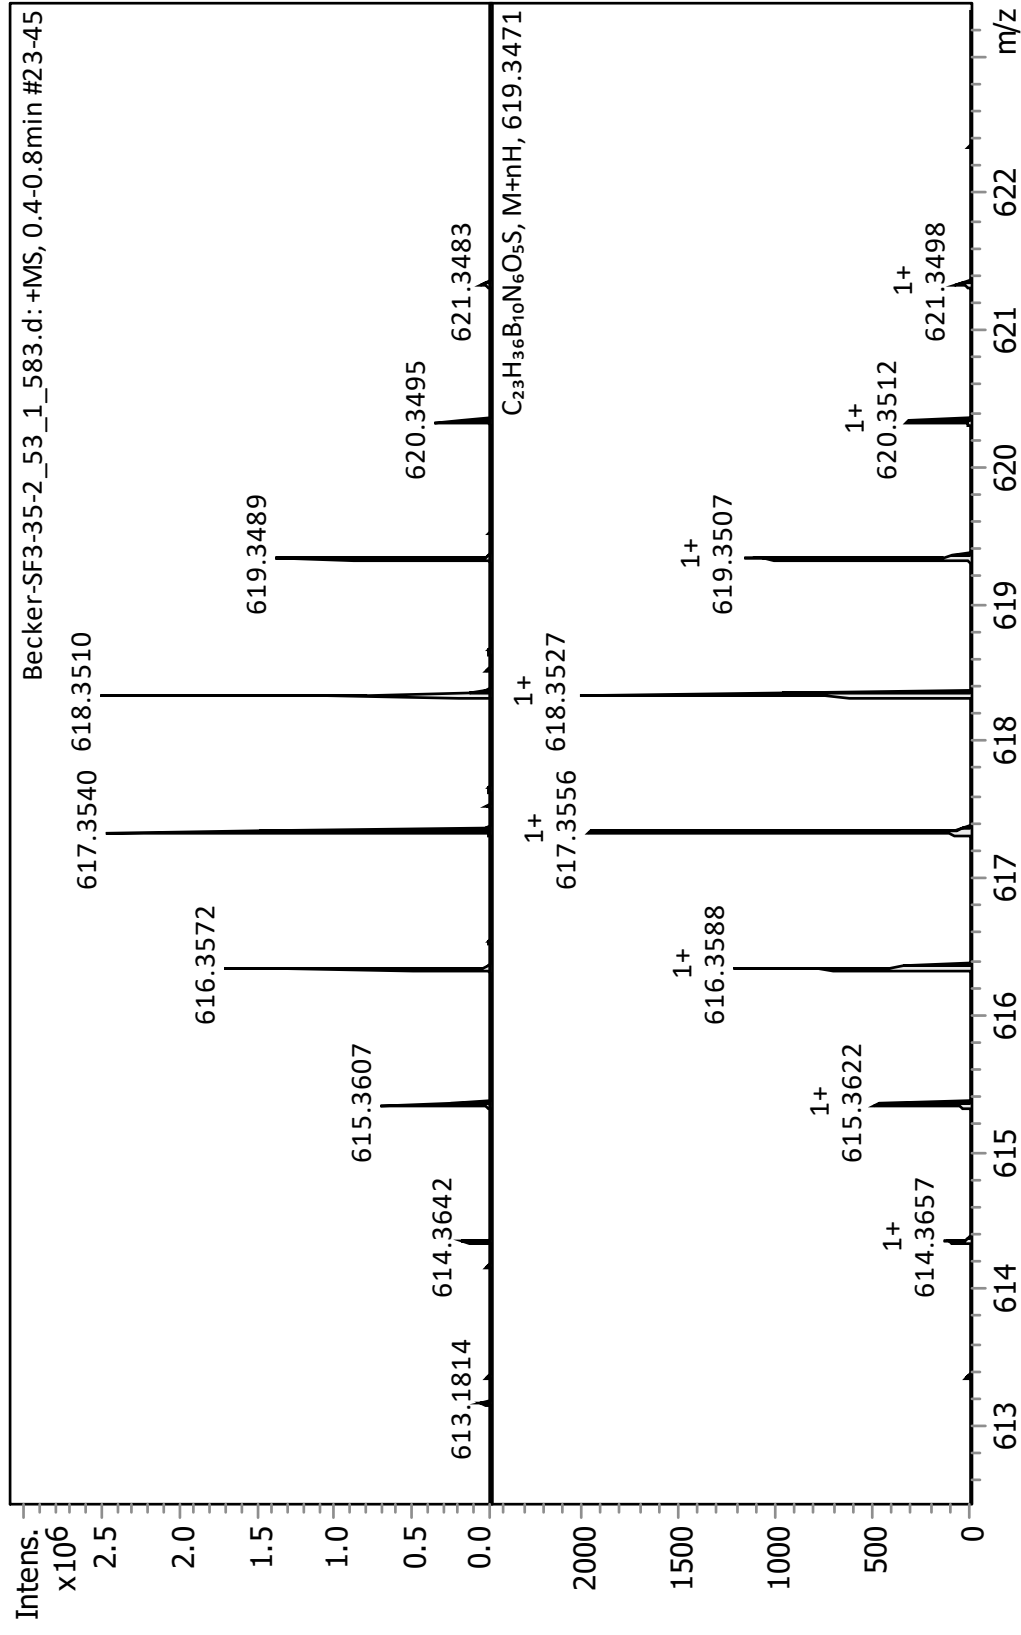

**Figure S1a.** Superposition of BNCT Agent **20** and SC-74020 compound **19** in 1HOV (MMP-2).

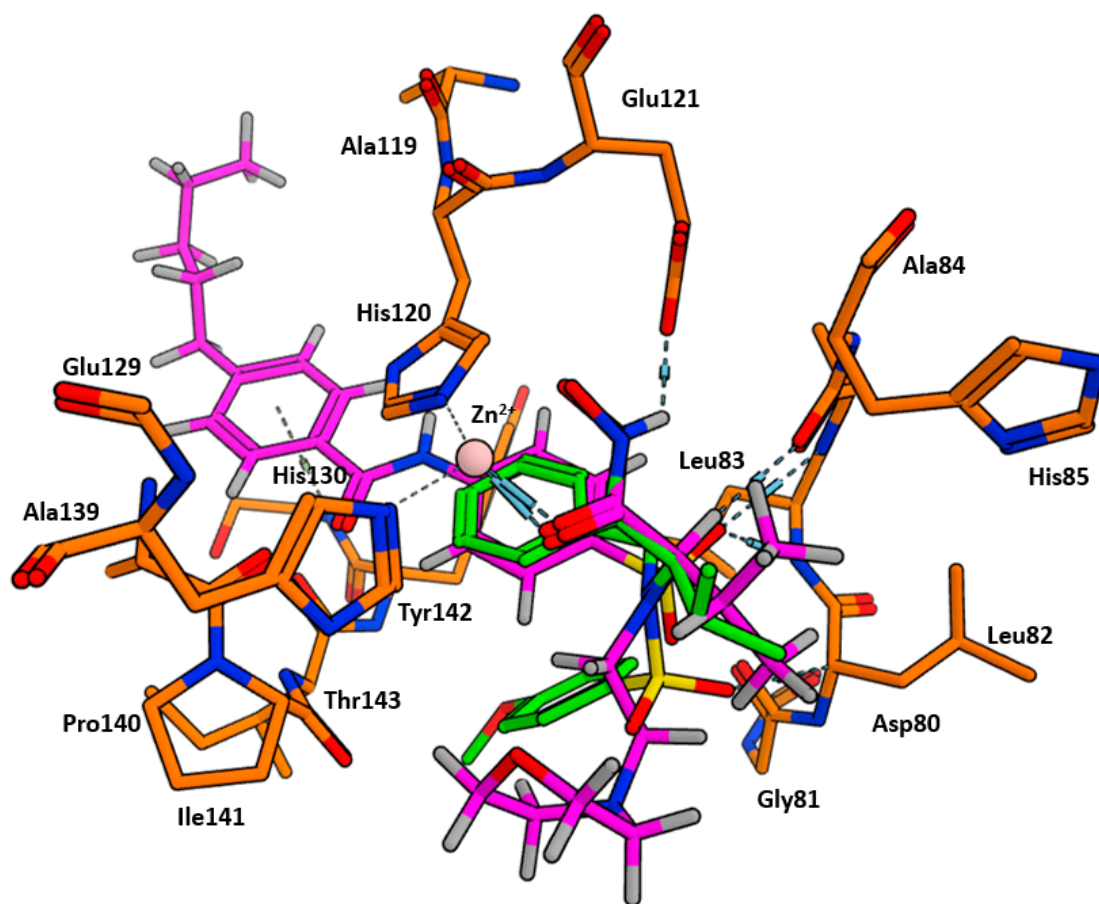

**Figure S1b.** Ligand interactions of 1HOV (MMP-2) with the bound ligand, BNCT Agent **20**, and  $\text{Zn}^{2+}$ .

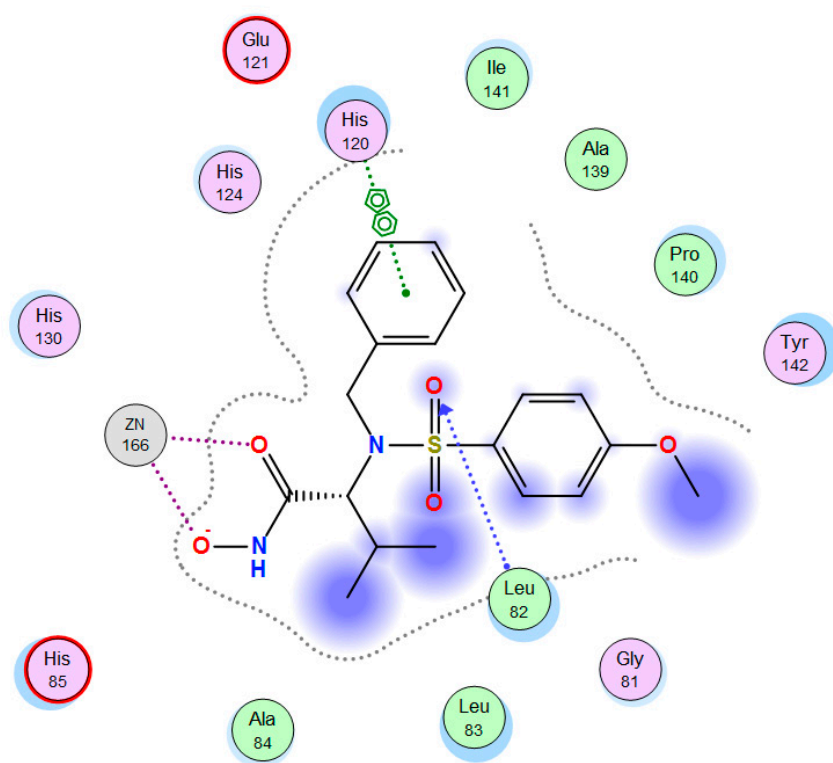



**Figure S2a.** Superposition of 1,4-click isomer **21** and SC-74020 compound **19** in 1HOV (MMP-2).

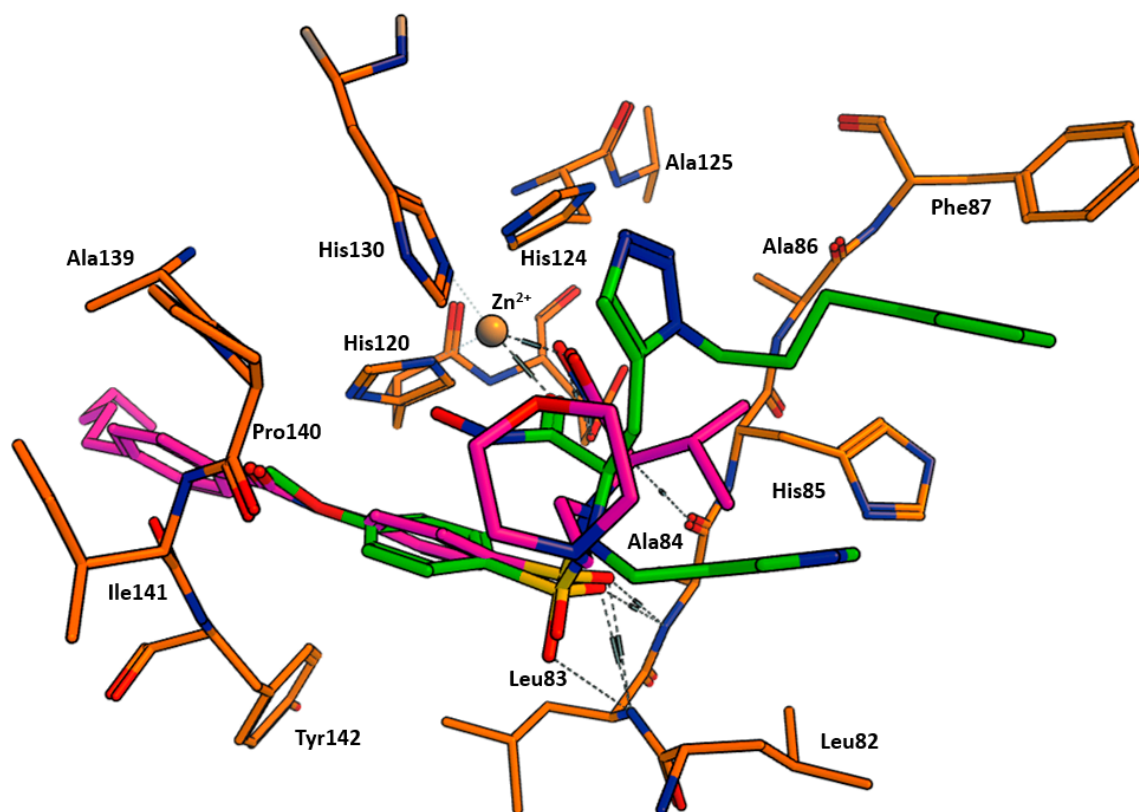

**Figure S2b.** Ligand interactions of 1HOV (MMP-2) with the bound ligand, 1,4-click isomer **21**, and Zn<sup>2+</sup>.

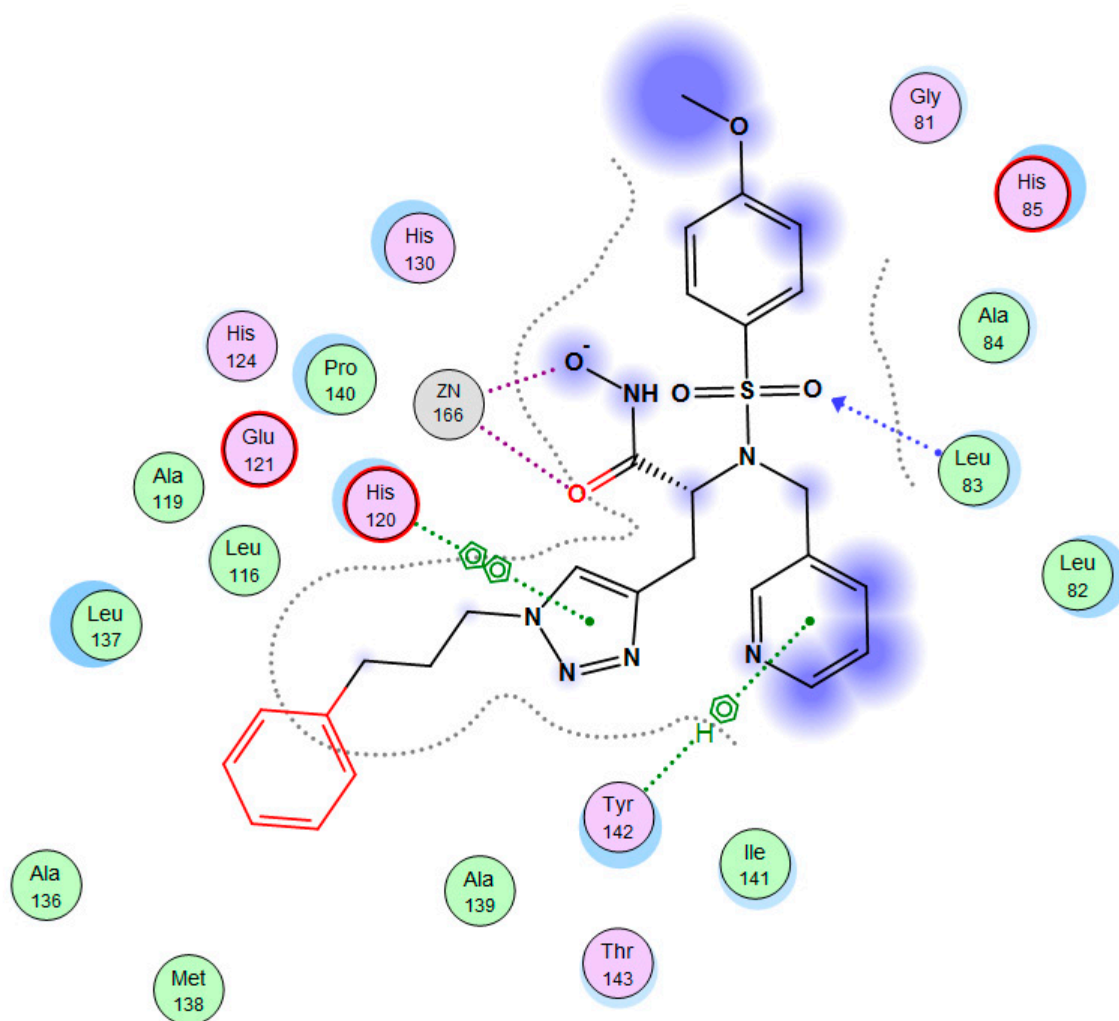

PDB coordinates for docked compounds are available

- **PDB of BNCT Agent 20 Docked in 1HOV.pdb**
- **PDB of BNCT Agent 20 and SC-74020 compound 19 Docked in 1HOV.pdb**
- **PDB of 1,4-Click Isomer 21 Docked in 1HOV.pdb**
- **PDB of 1,4-Click Isomer 21 and SC-74020 compound 19 Docked in 1HOV.pdb**

Compound **3** (SF-4-6A), carborane conjugated MMP inhibitor

Our standardized experimental methods are online at the following URL,

[https://1458ab30-7501-42df-8c2e-ff59d20cecb7.filesusr.com/ugd/ddd07a\\_cbe194d92fd14397a5db1690d68a185c.pdf](https://1458ab30-7501-42df-8c2e-ff59d20cecb7.filesusr.com/ugd/ddd07a_cbe194d92fd14397a5db1690d68a185c.pdf), which appears on the subsequent pages of this Supplemental Information packet.

The minimum requirement for our screening protocol of Boron compound samples (B-coms) for BNCT is water (and/or DMSO)-soluble 30 mg for first look screening of experiments 1, 2 and 3. Whole serial steps are as follows. Compound **3** (SF-4-6A), was eliminated from further screening at step 2 due to its toxicity.

1. Solubility in a physiological condition
2. Cell toxicity; IC<sub>50</sub>
3. Cellular BNCT (in-vitro BNCT)
4. Bio-distribution study (neutron induced boron autoradiography)
5. Animal BNCT (in-vivo BNCT)
6. Pre-clinical study

Experimental summary for carborane-containing MMP ligand **3** (SF-4-6A)

Compound **3** (SF-4-6A, abbreviated SF46A) information:

- 1) The carborane cluster has been prepared with enriched <sup>10</sup>B decaborane (>99% <sup>10</sup>B)
- 2) See compound **3** (SF-4-6A) in manuscript and experimental.
- 3) Molecular Formula: C<sub>15</sub>H<sub>30</sub><sup>10</sup>B<sub>10</sub>N<sub>2</sub>O<sub>5</sub>S boron content=10x10/450.32=22.2%
- 4) Molecular Weight: 450.32 g/mol (calculated based on enriched-<sup>10</sup>B)

|                              | Experiment 1                    | Experiment 2                    | Experiment 3                                       |
|------------------------------|---------------------------------|---------------------------------|----------------------------------------------------|
| sample                       | <b>3</b> (SF46A)                | <b>3</b> (SF46A)                | <b>3</b> (SF46A)                                   |
| Solvent (mg)                 | 20mg                            | 20mg                            | 20mg                                               |
| Dissolved in DMSO            | 1ml                             | 1ml                             | 1ml                                                |
| Add (x µl) into culture dish | 50µl                            | 100                             | 200<br>=4mg/ml SF46A<br>=0.8ppm <sup>10</sup> B/ml |
| Solubility                   | Completely and easily dissolved | Completely and easily dissolved | Completely and easily dissolved                    |

|                                                        |                                                      |                                                      |                                                      |
|--------------------------------------------------------|------------------------------------------------------|------------------------------------------------------|------------------------------------------------------|
| Filtering for sterilization through 0.022 $\mu$ m pore | Easily done                                          | Easily done                                          | Easily done                                          |
| Pulse 23:20                                            | 50 $\mu$                                             | 100 $\mu$                                            | 200 $\mu$                                            |
| Turbidity after adding                                 | + (clouded)                                          | ++ (strongly clouded)                                | +++ (strongly clouded)                               |
| Cell condition 3hrs after pulsation 01:50              | Round shaped (toxic)                                 | Detached from the bottom of the culture dish (toxic) | Detached from the bottom of the culture dish (toxic) |
| 04:20 incubation stop and cell condition               | Floating from the bottom of the culture dish (toxic) | Floating from the bottom of the culture dish (toxic) | Floating from the bottom of the culture dish (toxic) |
| ppm Boron in medium                                    | 22.2                                                 | 44.4                                                 | 66.6                                                 |

\*20mgx0.1x0.1x.22.2%=44.4 $\mu$ g/ml

#### IC<sub>50</sub>

| Boron compound | n    | $0.5x(1/2)^{n-1}$ | A mg/ml | $IC_{50}=Ax0.5x(1/2)^{n-1}$ mg/ml                                            |
|----------------|------|-------------------|---------|------------------------------------------------------------------------------|
| SF-4-6A        | 10.5 | $6.91x10^{-4}$    | 20      | $1.38x10^{-2}$ ( $3.07x10^{-5}$ mM)<br>( $3.07x10^{-3}$ ppm <sup>10</sup> B) |
| DSMO           | 5    | $3.13x10^{-2}$    |         | $3.13x10^{-1}$                                                               |

Water Solubility Determination of 1,4-click triazole **1**

| Solvent                   | 1,4-Click Triazole <b>1</b> |                       |           |           |
|---------------------------|-----------------------------|-----------------------|-----------|-----------|
|                           | Sample                      | Concentration (mg/mL) | Trial #1  | Trial #2  |
|                           |                             |                       | Peak Area | Peak Area |
| Acetonitrile              | <b>A-0</b>                  | 2.00                  | 9964.6    | 9772.6    |
|                           | <b>A-1</b>                  | 1.00                  | 5061.8    | 4915.7    |
|                           | <b>A-2</b>                  | 0.50                  | 2534.7    | 2473.0    |
|                           | <b>A-3</b>                  | 0.25                  | 1276.0    | 1250.7    |
|                           | <b>A-4</b>                  | 0.10                  | 503.0     | 478.3     |
|                           | <b>A-5</b>                  | 0.05                  | 247.9     | 233.2     |
|                           | <b>A-6</b>                  | 0.01                  | 8.3       | 8.8       |
| Nanopure H <sub>2</sub> O | <b>A-Aq</b>                 | Unknown               | 44        | 23.3      |

**Figure S3A.** Raw data from HPLC analysis to determine drug water solubility of 1,4-click triazole **1**.

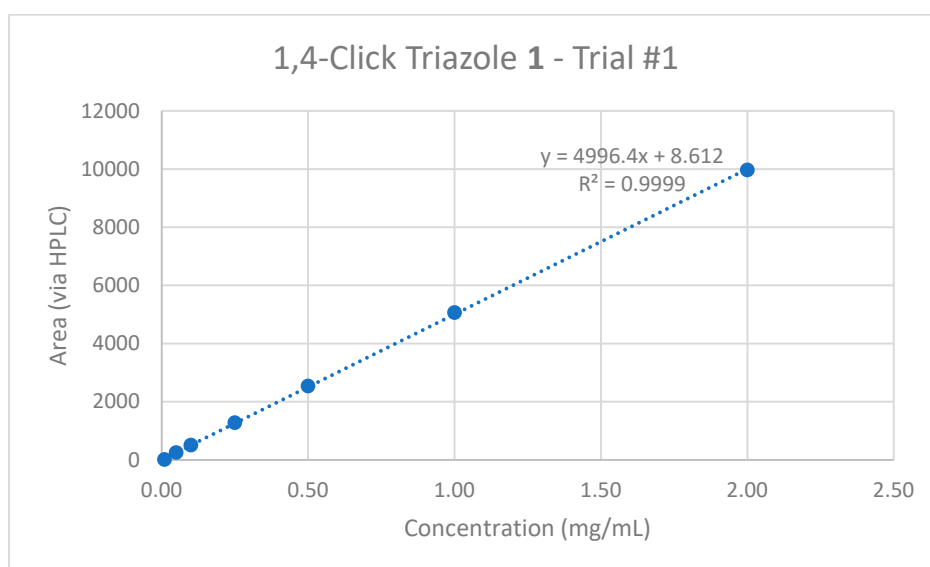

**Figure S3B.** Calibration graph (Trial 1) generated via HPLC analysis to determine drug water solubility of 1,4-click triazole **1**.

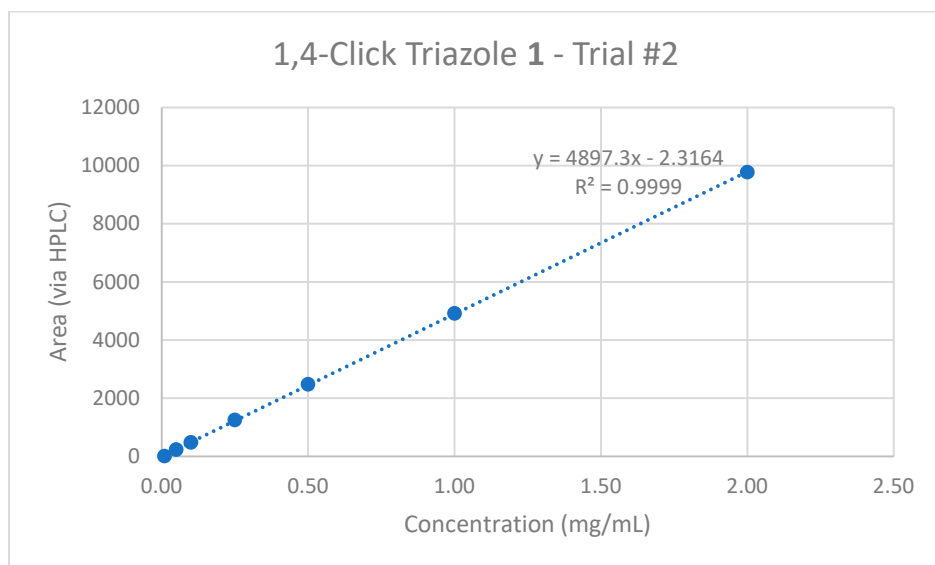

**Figure S3C.** Calibration graph (Trial 2) generated via HPLC analysis to determine drug water solubility of 1,4-click triazole **1**.

### Water Solubility Determination of 1,5-click triazole **2**

| Solvent                   | 1,5-Click Triazole <b>2</b> |                       |           |           |
|---------------------------|-----------------------------|-----------------------|-----------|-----------|
|                           | Sample                      | Concentration (mg/mL) | Trial #1  | Trial #2  |
|                           |                             |                       | Peak Area | Peak Area |
| Acetonitrile              | <b>B-0</b>                  | 2.00                  | 11789.5   | 11884.4   |
|                           | <b>B-1</b>                  | 1.00                  | 5930.6    | 6000.2    |
|                           | <b>B-2</b>                  | 0.50                  | 2975.9    | 2993.6    |
|                           | <b>B-3</b>                  | 0.25                  | 1473.9    | 1521.9    |
|                           | <b>B-4</b>                  | 0.10                  | 583.7     | 625.6     |
|                           | <b>B-5</b>                  | 0.05                  | 91.7      | 334.8     |
|                           | <b>B-6</b>                  | 0.01                  | 10.6      | 22.4      |
| Nanopure H <sub>2</sub> O | <b>B-Aq</b>                 | Unknown               | 29.5      | 20.5      |

**Figure S4A.** Raw data generated via HPLC analysis to determine drug water solubility of 1,5-click triazole **2**.

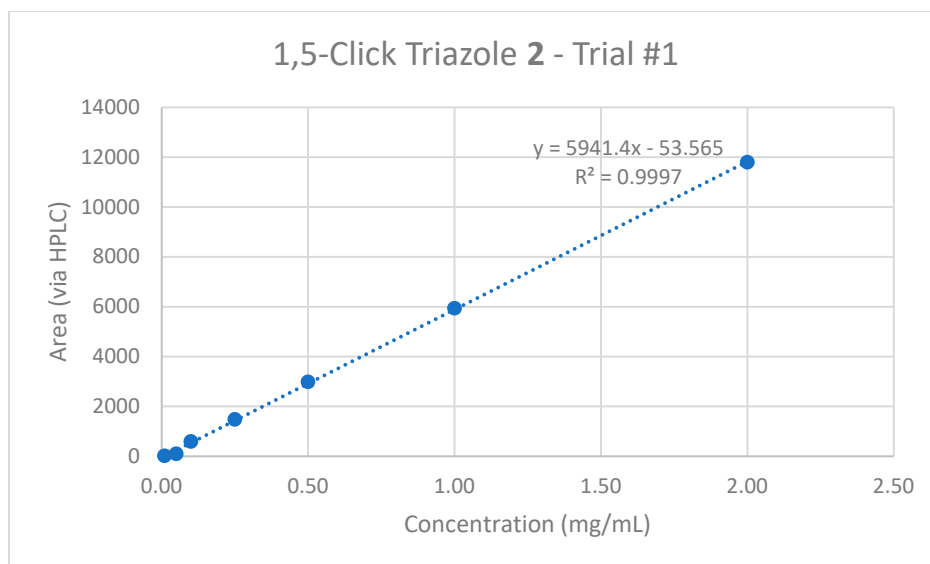

**Figure S4B.** Calibration graph (Trial 1) generated via HPLC analysis to determine drug water solubility of 1,5-click triazole **2**.



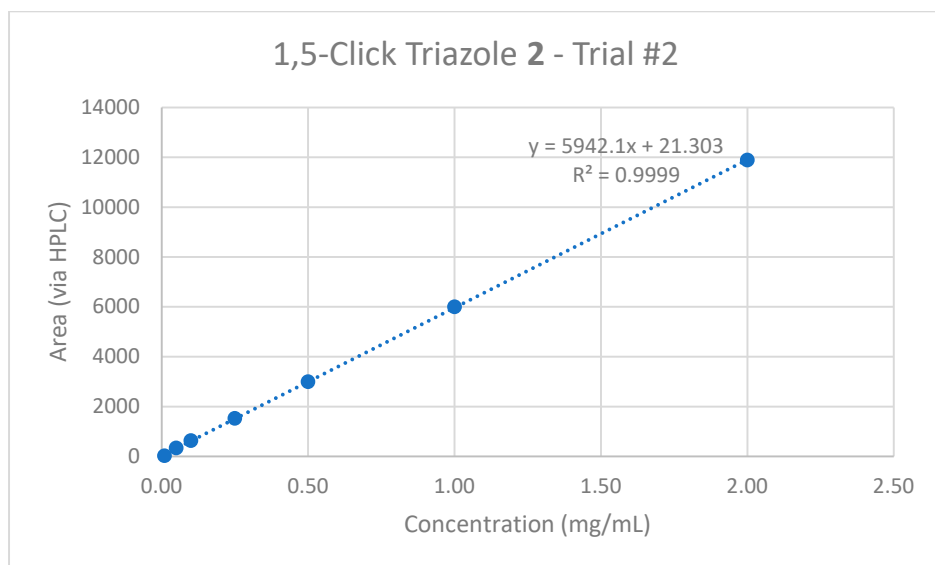

**Figure S4C.** Calibration graph (Trial 2) generated via HPLC analysis to determine drug water solubility of 1,5-click triazole 2.

Water Solubility Determination of CGS-27023A analog **3**.

| Solvent                   | CGS-27023A Enriched <sup>10</sup> B Analog <b>3</b> |                       |           |           |
|---------------------------|-----------------------------------------------------|-----------------------|-----------|-----------|
|                           | Sample                                              | Concentration (mg/mL) | Trial #1  | Trial #2  |
|                           |                                                     |                       | Peak Area | Peak Area |
| Acetonitrile              | <b>C-0</b>                                          | 2.00                  | 5863.2    | 5942.2    |
|                           | <b>C-1</b>                                          | 1.00                  | 2992.0    | 3044.7    |
|                           | <b>C-2</b>                                          | 0.50                  | 1526.5    | 1601.9    |
|                           | <b>C-3</b>                                          | 0.25                  | 762.2     | 845.1     |
|                           | <b>C-4</b>                                          | 0.10                  | 308.6     | 351.7     |
|                           | <b>C-5</b>                                          | 0.05                  | 154.1     | 174.0     |
|                           | <b>C-6</b>                                          | 0.01                  | 7.0       | 23.3      |
| Nanopure H <sub>2</sub> O | <b>C-Aq</b>                                         | Unknown               | 17.8      | 91.8      |

**Figure S5A.** Raw data generated via HPLC analysis to determine drug water solubility of CGS-27023A analog **3**.

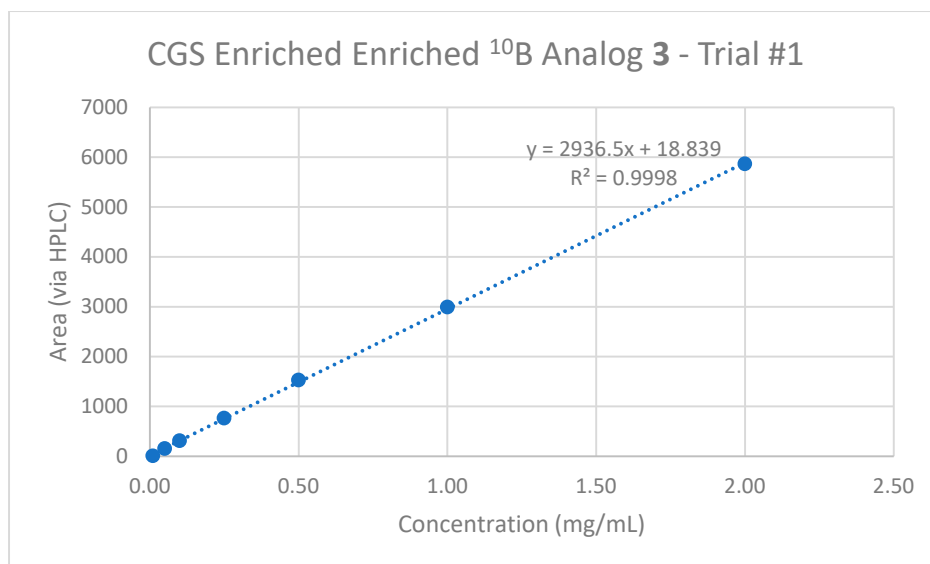

**Figure S5B.** Calibration graph (Trial 1) generated via HPLC analysis to determine drug water solubility of CGS-27023A analog **3**.

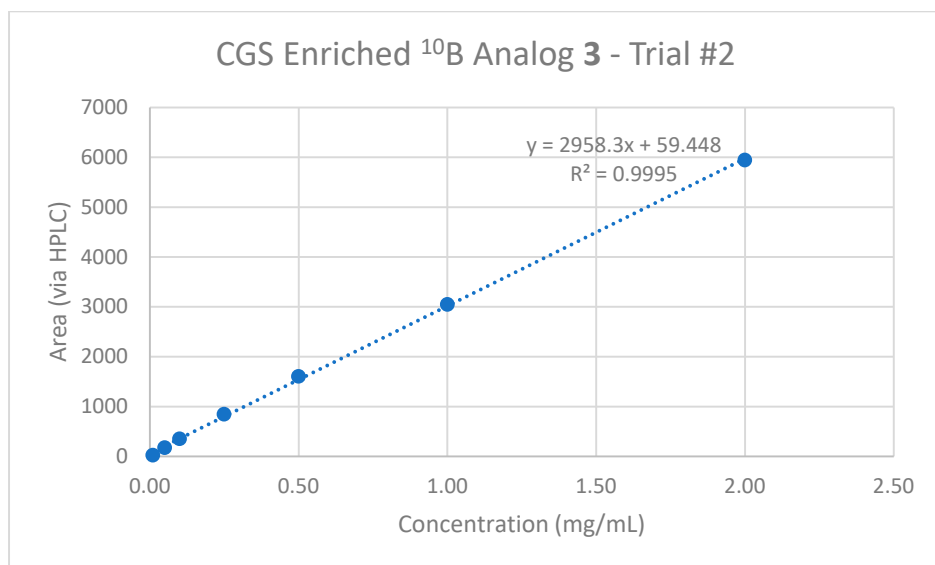

**Figure S5C.** Calibration graph (Trial 2) generated via HPLC analysis to determine drug water solubility of CGS-27023A analog **3**.

Water Solubility Determination of 1,4-Click triazole **4**.

| Solvent                   | CGS-27023A 1,4-Click Triazole <b>4</b> |                       |           |           |
|---------------------------|----------------------------------------|-----------------------|-----------|-----------|
|                           | Sample                                 | Concentration (mg/mL) | Trial #1  | Trial #2  |
|                           |                                        |                       | Peak Area | Peak Area |
| Methanol                  | <b>D-0</b>                             | 2.00                  | 6666.0    | 6821.1    |
|                           | <b>D-1</b>                             | 1.00                  | 3315.6    | 3381.9    |
|                           | <b>D-2</b>                             | 0.50                  | 1617.4    | 1635.8    |
|                           | <b>D-3</b>                             | 0.25                  | 799.8     | 810.5     |
|                           | <b>D-4</b>                             | 0.10                  | 307.3     | 310.0     |
|                           | <b>D-5</b>                             | 0.05                  | 150.2     | 156.2     |
|                           | <b>D-6</b>                             | 0.01                  | 5.9       | 7.5       |
| Nanopure H <sub>2</sub> O | <b>D-Aq</b>                            | Unknown               | 321.1     | 257.9     |

**Figure S6A.** Raw data generated via HPLC analysis to determine drug water solubility of CGS-27023A 1,4-Click triazole **4**.

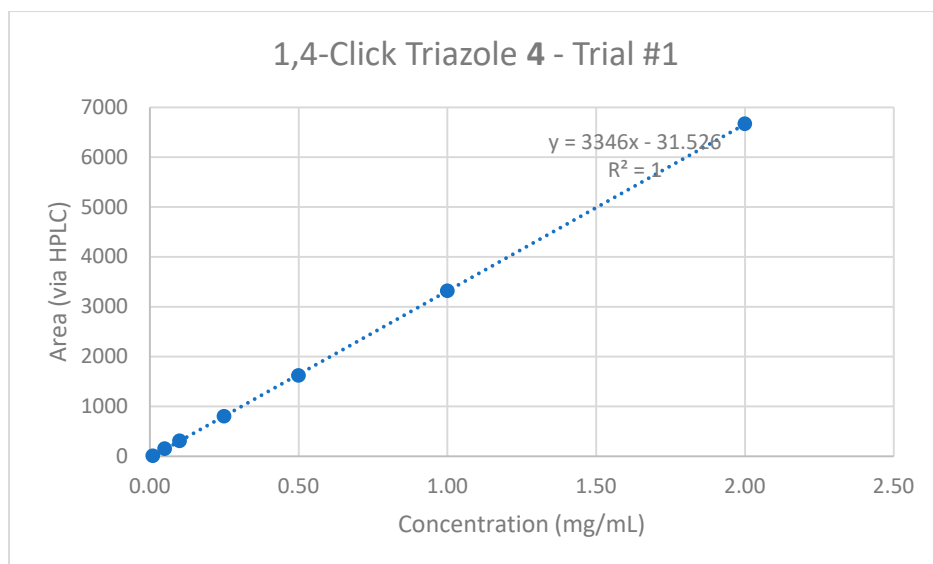

**Figure S6B.** Calibration graph (Trial 1) generated via HPLC analysis to determine drug water solubility of CGS-27023A 1,4-Click triazole **4**.

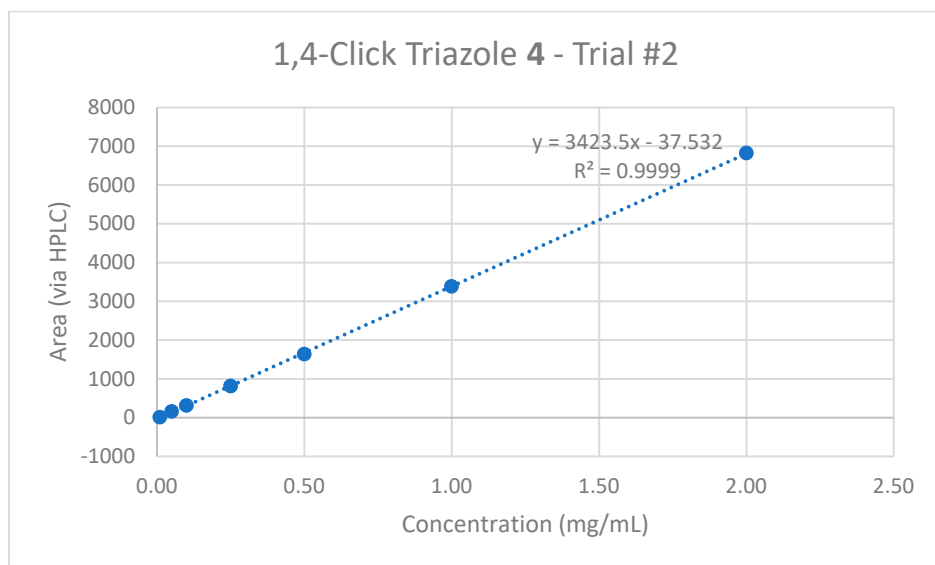

**Figure S6C.** Calibration graph (Trial 2) generated via HPLC analysis to determine drug water solubility of CGS-27023A 1,4-Click triazole **4**.

# U87 MG *delta EGFR* (colony efficiency 4 %)

| U87                           | X (Thermal Fluence) | Y (Survival fraction) | std in SF   |
|-------------------------------|---------------------|-----------------------|-------------|
| control                       | 0.00E+00            | 1                     | 0.090138782 |
|                               | 9.24E+11            | 0.758333333           | 0.038188131 |
|                               | 1.91E+12            | 0.5                   | 0.066143783 |
|                               | 2.50E+12            | 0.333333333           | 0.057735027 |
| BPA( <sup>10</sup> B 20ppm)   | 0.00E+00            | 1                     | 0.070168517 |
|                               | 9.24E+11            | 0.494382022           | 0.07784498  |
|                               | 1.91E+12            | 0.202247191           | 0.033707865 |
|                               | 2.50E+12            | 0.179775281           | 0.03892249  |
| #4 ( <sup>10</sup> B 0.48ppm) | 0.00E+00            | 1                     | 0.021650635 |
|                               | 9.24E+11            | 0.6125                | 0.229128785 |
|                               | 1.91E+12            | 0.2125                | 0.057282196 |
|                               | 2.50E+12            | 0.0625                | 0.021650635 |

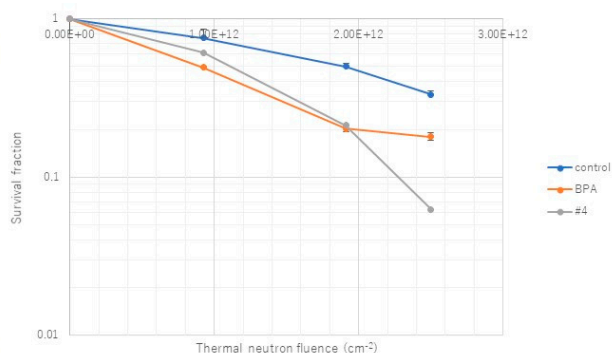

Survival fraction in U87 MG cells. BPA: 20 ppm <sup>10</sup>B; compound **4**: 0.48 ppm <sup>10</sup>B treated with U87 *delta EGFR* cells for 4 hours

**Figure S7a.** Survival fraction in U87 MG cells. BPA: 20 ppm <sup>10</sup>B; compound **4**: 0.48 ppm <sup>10</sup>B treated with U87 *delta EGFR* cells for 4 hours with raw data and standard deviation values.

# SCC 7 (colony efficiency 34 %)

| SCC7                         | X (Thermal Fluence) | Y (Survival fraction) | std in SF   |
|------------------------------|---------------------|-----------------------|-------------|
| control                      | 0.00E+00            | 1                     | 0.120983443 |
|                              | 9.24E+11            | 0.79296875            | 0.097578094 |
|                              | 1.91E+12            | 0.62109375            | 0.025540423 |
|                              | 2.50E+12            | 0.58984375            | 0.018835255 |
| BPA ( <sup>10</sup> B 20ppm) | 0.00E+00            | 1                     | 0.195263916 |
|                              | 9.24E+11            | 0.20824295            | 0.006507592 |
|                              | 1.91E+12            | 0.093275488           | 0.00751432  |
|                              | 2.50E+12            | 0.054229935           | 0.009940511 |
| #4( <sup>10</sup> B 0.48ppm) | 0.00E+00            | 1                     | 0.111704296 |
|                              | 9.24E+11            | 0.621880998           | 0.077468085 |
|                              | 1.91E+12            | 0.548944338           | 0.008795731 |
|                              | 2.50E+12            | 0.378119002           | 0.01198656  |

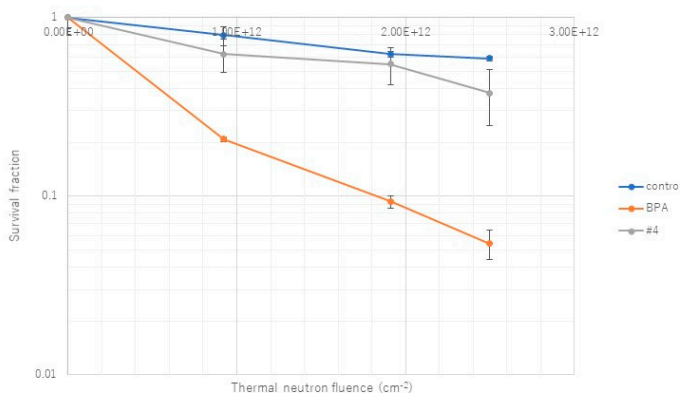

Survival fraction in SCC7 cells. BPA: 20 ppm <sup>10</sup>B; compound **4**: 0.48 ppm <sup>10</sup>B treated with SCC7 cells for 4 hours.

**Figure S7b.** Survival fraction in SCC7 cells. BPA: 20 ppm <sup>10</sup>B; compound **4**: 0.48 ppm <sup>10</sup>B treated with SCC7 cells for 4 hours with raw data and standard deviation values.

### Boron concentration measurement by ICP-OES

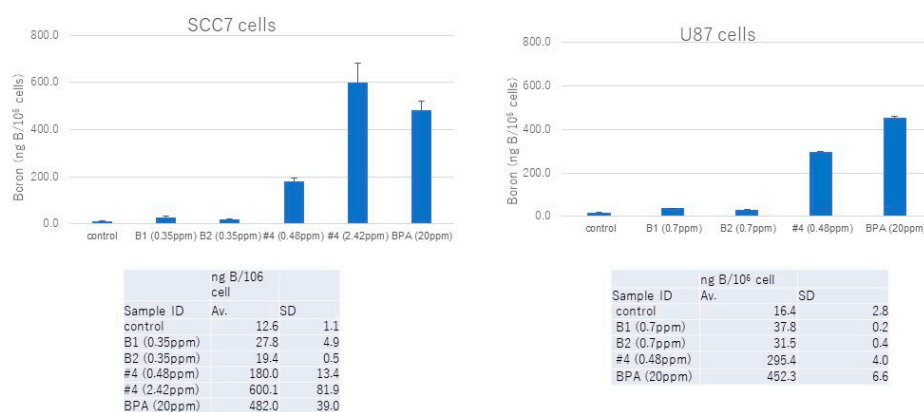

**Figure S8.** Boron concentrations in SCCVII cells and in U87 cells determined by ICP-OES with standard deviation values.

### Calculation of <sup>10</sup>B concentration in Medium

- B1 and B2 : 6 mg/ml DMSO stock solution. If the medium final concentration is 2 micro L/ml, the medium include 0.012 mg/ml of B1 or B2. In 1 mol of B1 or B2 (MW 450.32), <sup>10</sup>B weighs 26.4 (22 % of natural boron) g in 450.32 g. Therefore, the medium includes 0.703 ppm (=0.012\*26.4/450.32 mg/ml) of <sup>10</sup>B.
- Compound #4: 12mg/ml DMSO stock solution. If the medium final concentration is 1 micro L/ml, the medium include 0.012mg/ml of #4. In 1 mol of #4 (MW 652.19), <sup>10</sup>B weighs 26.4 (22 % of natural boron) g in 652.19 g. Therefore, the medium includes 0.485ppm (=0.012\*26.4/652.19 mg/ml) of <sup>10</sup>B.
